# Supplementary material for: Genome-wide identification and expression analysis of ADP-ribosylation factors associated with biotic and abiotic stress in wheat (Triticum aestivum L.)
Source: PeerJ. 2021 Mar 2;9:e10963. doi: 10.7717/peerj.10963 (PMC7934654; doi:10.7717/peerj.10963)
Supplement: Supplemental Information 1 [file peerj-09-10963-s001.xlsx]

## Sheet: Sheet1
	Table S1. Informations of ARF proteins identified in this study.
Clade	Gene Name	Gene ID	Alt transcript(s)	Pfam-ID	InterProScan-ID	MW	pI	Instability index	GRAVY	Tertiary structure	TPMmax	Subcellular Localization
ARFA1	TaARFA1a-A	TraesCS1A02G306200.1	no	PF00025	IPR006689	21.3175	6.92	33.68	-0.195	c6a8dA	318.451	Mitochondrial
ARFA1	TaARFA1a-B	TraesCS1B02G317000.1	no	PF00025	IPR006689	21.1063	6.97	32.95	-0.257	c6a8dA	478.252	Cytoplasmic&Mitochondrial
ARFA1	TaARFA1a-D	TraesCS1D02G305900.1	no	PF00025	IPR006689	29.6369	9.35	50.37	-0.486	c6bbqA	851.879	Chloroplast&Peroxisomal
ARFA1	TaARFA1b-A	TraesCS2A02G235500.1	no	PF00025	IPR006689	20.5656	6.43	31.93	-0.176	c6a8dA	48.1615	Peroxisomal
ARFA1	TaARFA1c-D	TraesCS2D02G244900.1	TraesCS2D02G244900.2	PF00025	IPR006689	20.5816	6.43	33	-0.191	c6a8dA	175.922	Peroxisomal
ARFA1	TaARFA1d-A	TraesCS3A02G337300.1	TraesCS3A02G337300.2	PF00025	IPR006689	20.878	6.43	34.91	-0.229	d1r8qa	0.262366	Mitochondrial
ARFA1	TaARFA1d-B	TraesCS3B02G368600.1	TraesCS3B02G368600.2	PF00025	IPR006689	20.7078	6.43	33.74	-0.222	c6a8dA	237.335	Peroxisomal
ARFA1	TaARFA1d-D	TraesCS3D02G330500.2	TraesCS3D02G330500.1	PF00025	IPR006689	20.7078	6.43	33.74	-0.222	c6bbqA	160.66	Cytoplasmic
ARFA1	TaARFA1e-A	TraesCS5A02G142100.1	no	PF00025	IPR006689	20.4374	6.09	32.91	-0.163	c6a8dA	260.239	Cytoplasmic
ARFA1	TaARFA1e-B	TraesCS5B02G140900.1	no	PF00025	IPR006689	20.4374	6.09	32.91	-0.163	c6a8dA	248.414	Cytoplasmic
ARFA1	TaARFA1e-D	TraesCS5D02G150000.1	TraesCS5D02G150000.2	PF00025	IPR006689	20.6497	6.09	32.2	-0.114	d1r8qa	227.774	Cytoplasmic
ARFA1	TaARFA1f-A	TraesCS5A02G467400.1	no	PF00025	IPR006689	24.0175	7.77	37.26	-0.362	c6bbqA	562.474	Cytoplasmic
ARFA1	TaARFA1f-B	TraesCS5B02G479100.1	no	PF00025	IPR006689	24.0194	6.02	37.85	-0.356	c6bbqA	691.631	Cytoplasmic
ARFA1	TaARFA1f-D	TraesCS5D02G480200.1	no	PF00025	IPR006689	23.9934	7.77	36.43	-0.358	c6bbqA	633.83	Cytoplasmic
ARFB1	TaARFB1a-A	TraesCS1A02G197800.1	no	PF00025	IPR006689	21.5449	6.3	24.59	-0.034	c6a8dA	29.1944	Cytoplasmic
ARFB1	TaARFB1a-B	TraesCS1B02G212500.1	no	PF00025	IPR006689	21.5449	6.3	24.59	-0.034	c6a8dA	27.0738	Cytoplasmic
ARFB1	TaARFB1a-D	TraesCS1D02G201300.1	no	PF00025	IPR006689	21.5449	6.3	24.59	-0.034	c6a8dA	32.507	Cytoplasmic
ARFB1	TaARFB1b-A	TraesCS6A02G086900.1	TraesCS6A02G086900.2	PF00025	IPR006689	21.8164	5.58	49.52	-0.108	c6a8dA	12.1169	Mitochondrial
ARFB1	TaARFB1c-A	TraesCS6A02G268000.1	no	PF00025	IPR006689	21.3727	6.83	32.75	-0.064	c6a8dA	24.9229	Chloroplast
ARFB1	TaARFB1c-B	TraesCS6B02G295200.1	no	PF00025	IPR006689	27.9661	9.3	46.13	-0.469	c6bbqA	23.9373	Chloroplast
ARFB1	TaARFB1c-D	TraesCS6D02G246900.1	no	PF00025	IPR006689	21.4027	6.83	33.75	-0.066	c6a8dA	17.5695	Chloroplast
ARFB1	TaARFB1d-B	TraesCS6B02G114900.1	TraesCS6B02G114900.2	PF00025	IPR006689	19.4472	5.81	49.1	-0.217	c6bbqA	0.59753	Mitochondrial
ARFB1	TaARFB1e-N	TraesCSU02G019600.1	TraesCSU02G019600.2	PF00025	IPR006689	21.8391	5.82	51.11	-0.119	c6a8dA	24.1988	Mitochondrial
ARFC1	TaARFC1-A	TraesCS4A02G149200.1	no	PF00025	IPR006689	20.3803	5.94	32.67	0.033	c6bbqA	34.9237	Cytoplasmic
ARFC1	TaARFC1-B	TraesCS4B02G164400.1	no	PF00025	IPR006689	20.3142	5.84	33.64	0.059	c6a8dA	62.4425	Cytoplasmic
ARFC1	TaARFC1-D	TraesCS4D02G152600.1	no	PF00025	IPR006689	20.3533	6.05	32.26	0.053	c6a8dA	72.3034	Cytoplasmic
ARF3	TaARF3-A	TraesCS7A02G284000.1	TraesCS7A02G284000.2,TraesCS7A02G284000.3	PF00025	IPR006689	20.3102	5.73	24.95	-0.035	c6a8dA	22.7889	Chloroplast
ARF3	TaARF3-B	TraesCS7B02G181400.1	TraesCS7B02G181400.2	PF00025	IPR006689	22.2896	6.14	26.68	-0.017	c6bbqA	3.3334	Chloroplast
ARF3	TaARF3-D	TraesCS7D02G282400.1	TraesCS7D02G282400.2,TraesCS7D2G282400.3	PF00025	IPR006689	22.2906	5.46	27.66	-0.015	c6a8dA	2.49613	Chloroplast
ARL1	TaARL1a-A	TraesCS3A02G172900.1	no	PF00025	IPR006689	21.9413	5.95	29.27	-0.145	c6bbqA	32.9986	Cytoplasmic
ARL1	TaARL1a-B	TraesCS3B02G203800.1	no	PF00025	IPR006689	21.9413	5.95	29.27	-0.145	c6bbqA	47.815	Cytoplasmic
ARL1	TaARL1a-D	TraesCS3D02G179300.1	TraesCS3D02G179300.2	PF00025	IPR006689	22.8574	6.32	31.65	-0.078	c6bbqA	2.12914	Cytoplasmic
ARL1	TaARL1b-A	TraesCS3A02G193800.1	TraesCS3A02G193800.2	PF00025	IPR006689	22.1125	6.97	29.92	-0.192	c6bbqA	96.3984	Cytoplasmic
ARL1	TaARL1b-B	TraesCS3B02G221700.1	no	PF00025	IPR006689	22.1125	6.97	29.92	-0.192	c6bbqA	82.9501	Cytoplasmic
ARL1	TaARL1b-D	TraesCS3D02G196200.1	no	PF00025	IPR006689	22.1285	6.97	30.92	-0.205	c6bbqA	91.0342	Cytoplasmic
ARL1	TaARL1c-A	TraesCS4A02G045000.1	no	PF00025	IPR006689	20.7252	9.15	30.12	-0.044	c5c2kA	35.304	Nuclear
ARL1	TaARL1c-B	TraesCS4B02G260300.1	no	PF00025	IPR006689	20.7252	9.15	30.12	-0.044	c5c2kA	46.1854	Nuclear
ARL1	TaARL1c-D	TraesCS4D02G260100.1	no	PF00025	IPR006689	20.7252	9.15	30.12	-0.044	c5c2kA	49.8905	Nuclear
ARL1	TaARL1d-A	TraesCS5A02G089200.1	no	PF00025	IPR006689	22.0435	6.91	32.2	-0.15	c6bbqA	91.5574	Cytoplasmic
ARL1	TaARL1d-B	TraesCS5B02G095200.1	no	PF00025	IPR006689	22.0806	7.75	30.69	-0.167	c6bbqA	47.259	Cytoplasmic
ARL1	TaARL1d-D	TraesCS5D02G101300.1	no	PF00025	IPR006689	22.0615	6.91	32.2	-0.16	c6bbqA	78.2835	Cytoplasmic
ARL1	TaARL1e-A	TraesCS6A02G293900.1	no	PF00025	IPR006689	20.595	8.32	34.86	-0.02	c6a8dA	47.6536	Nuclear
ARL1	TaARL1e-B	TraesCS6B02G324400.1	TraesCS6B02G324400.2	PF00025	IPR006689	19.4867	8.31	29.48	-0.008	d1mr3f	11.2119	Cytoplasmic
ARL1	TaARL1e-D	TraesCS6D02G274800.1	no	PF00025	IPR006689	20.595	8.32	34.86	-0.02	c6a8dA	41.5235	Nuclear
ARL1	TaARL1f-B	TraesCS7B02G236300.1	no	PF00025	IPR006689	22.1375	6.59	31.91	-0.17	c6bbqA	1.48191	Cytoplasmic
ARL1	TaARL1g-D	TraesCS7D02G332100.1	no	PF00025	IPR006689	22.1115	6.21	29.5	-0.126	c6bbqA	2.12839	Chloroplast
GB1	TaGB1a-A	TraesCS1A02G069400.1	no	PF00025	IPR006689	22.9282	5.67	44.81	-0.241	c6a8dA	27.0657	Peroxisomal
GB1	TaGB1a-B	TraesCS1B02G087700.1	no	PF00025	IPR006689	22.8111	6.07	46.39	-0.219	c1mykA	22.6722	Chloroplast
GB1	TaGB1a-D	TraesCS1D02G072000.1	no	PF00025	IPR006689	22.9442	5.67	44.81	-0.254	c6a8dA	25.1085	Peroxisomal
GB1	TaGB1b-B	TraesCS2B02G191100.1	TraesCS2B02G191100.2	PF00025	IPR006689	19.3412	5.89	50.48	-0.202	c6bbqA	2.22493	Cytoplasmic
GB1	TaGB1c-D	TraesCS2D02G172000.1	no	PF00025	IPR006689	22.505	7.09	46.12	-0.26	c6a8dA	0.202588	Peroxisomal
TTN5	TaTTN5a-A	TraesCS1A02G421700.1	no	PF00025	IPR006689	22.6211	8.36	38.99	-0.254	c3doeA	0.59326	Chloroplast
TTN5	TaTTN5b-D	TraesCS1D02G429700.1	TraesCS1D02G429700.2	PF00025	IPR006689	21.1664	8.46	30.43	-0.281	c3doeA	0.861826	Cytoplasmic
TTN5	TaTTN5c-A	TraesCS5A02G014900.1	no	PF00025	IPR006689	21.1354	8.46	32.75	-0.235	c3doeA	11.6798	Nuclear&Cytoplasmic
TTN5	TaTTN5c-B	TraesCS5B02G013100.1	no	PF00025	IPR006689	21.0793	8.46	32.4	-0.261	c3doeA	4.75609	Nuclear&Cytoplasmic
TTN5	TaTTN5c-D	TraesCS5D02G020800.1	no	PF00025	IPR006689	21.1354	8.46	32.75	-0.235	c3doeA	5.55396	Nuclear&Cytoplasmic
