# Supplementary material for: Genome-wide identification and expression analysis of ADP-ribosylation factors associated with biotic and abiotic stress in wheat (Triticum aestivum L.)
Source: PeerJ. 2021 Mar 2;9:e10963. doi: 10.7717/peerj.10963 (PMC7934654; doi:10.7717/peerj.10963)
Supplement: Supplemental Information 2 [file peerj-09-10963-s002.xlsx]

## Sheet: Sheet1
Table S2. General information of ARF genes selected for phylogenetic analysis of Figure 1.
Gene	Accession no. or locus ID	Source of information
OsARF3	LOC_Os08g15040.1	Muthamilarasan, M.et al.（2016）[1]
OsARFA1a	LOC_Os01g59790.2	Muthamilarasan, M.et al.（2016）[1]
OsARFA1b	LOC_Os05g41060.1	Muthamilarasan, M.et al.（2016）[1]
OsARFA1c	LOC_Os07g12170.1	Muthamilarasan, M.et al.（2016）[1]
OsARFA1d	LOC_Os07g12200.1	Muthamilarasan, M.et al.（2016）[1]
OsARFA1e	LOC_Os01g16030.1	Muthamilarasan, M.et al.（2016）[1]
OsARFA1f	LOC_Os03g59740.1	Muthamilarasan, M.et al.（2016）[1]
OsARFB1a	LOC_Os06g02390.1	Muthamilarasan, M.et al.（2016）[1]
OsARFB1b	LOC_Os02g03610.1	Muthamilarasan, M.et al.（2016）[1]
OsARFB1c	LOC_Os10g42940.1	Muthamilarasan, M.et al.（2016）[1]
OsARFB1d	LOC_Os02g47110.2	Muthamilarasan, M.et al.（2016）[1]
OsARFC1	LOC_Os11g37640.1	Muthamilarasan, M.et al.（2016）[1]
OsARL1a	LOC_Os03g10370.1	Muthamilarasan, M.et al.（2016）[1]
OSARL1b	LOC_Os02g49980.1	Muthamilarasan, M.et al.（2016）[1]
OsARL1c	LOC_Os06g12090.1	Muthamilarasan, M.et al.（2016）[1]
OsARL1d	LOC_Os01g15010.1	Muthamilarasan, M.et al.（2016）[1]
OsARL1e	LOC_Os01g23620.1	Muthamilarasan, M.et al.（2016）[1]
OsARL1f	LOC_Os12g37360.1	Muthamilarasan, M.et al.（2016）[1]
OsGB1a	LOC_Os03g27450.1	Muthamilarasan, M.et al.（2016）[1]
OsGB1b	LOC_Os07g42820.1	Muthamilarasan, M.et al.（2016）[1]
OsTTN5	LOC_Os02g22140.1	Muthamilarasan, M.et al.（2016）[1]
AtARFA1a	At1g23490	Gebbie, L.K.(2005)[2]
AtARFA1b	At5g14670	Gebbie, L.K.(2005)[2]
AtARFA1c	At2g47170	Gebbie, L.K.(2005)[2]
AtARFA1d	At1g70490	Gebbie, L.K.(2005)[2]
AtARFA1e	At3g62290	Gebbie, L.K.(2005)[2]
AtARFA1f	At1g10630	Gebbie, L.K.(2005)[2]
AtARFB1a	At2g15310	Gebbie, L.K.(2005)[2]
AtARFB1b	At5g17060	Gebbie, L.K.(2005)[2]
AtARFB1c	At3g03120	Gebbie, L.K.(2005)[2]
AtARF3	At2g24765	Gebbie, L.K.(2005)[2]
AtARFC1	At3g22950	Gebbie, L.K.(2005)[2]
AtTTN5	At2g18390	Gebbie, L.K.(2005)[2]
AtARL1c	At5g37680	Gebbie, L.K.(2005)[2]
AtARL1a	At3g49870	Gebbie, L.K.(2005)[2]
AtARL1b	At5g67560	Gebbie, L.K.(2005)[2]
AtARL1d	At3g49860	Gebbie, L.K.(2005)[2]
AtGB1	At5g52210	Gebbie, L.K.(2005)[2]
AtARFD1a	At1g02440	Gebbie, L.K.(2005)[2]
AtARFD1b	At1g02430	Gebbie, L.K.(2005)[2]
TaGB1a-A	TraesCS1A02G069400.1	Information identified in this study
TaARFB1a-A	TraesCS1A02G197800.1	Information identified in this study
TaARFA1a-A	TraesCS1A02G306200.1	Information identified in this study
TaTTN5a-A	TraesCS1A02G421700.1	Information identified in this study
TaGB1a-B	TraesCS1B02G087700.1	Information identified in this study
TaARFB1a-B	TraesCS1B02G212500.1	Information identified in this study
TaARFA1a-B	TraesCS1B02G317000.1	Information identified in this study
TaGB1a-D	TraesCS1D02G072000.1	Information identified in this study
TaARFB1a-D	TraesCS1D02G201300.1	Information identified in this study
TaARFA1a-D	TraesCS1D02G305900.1	Information identified in this study
TaTTN5b-D	TraesCS1D02G429700.1	Information identified in this study
TaARFA1b-A	TraesCS2A02G235500.1	Information identified in this study
TaGB1b-B	TraesCS2B02G191100.1	Information identified in this study
TaGB1c-D	TraesCS2D02G172000.1	Information identified in this study
TaARFA1c-D	TraesCS2D02G244900.1	Information identified in this study
TaARL1a-A	TraesCS3A02G172900.1	Information identified in this study
TaARL1b-A	TraesCS3A02G193800.1	Information identified in this study
TaARFA1d-A	TraesCS3A02G337300.1	Information identified in this study
TaARL1a-B	TraesCS3B02G203800.1	Information identified in this study
TaARL1b-B	TraesCS3B02G221700.1	Information identified in this study
TaARFA1d-B	TraesCS3B02G368600.1	Information identified in this study
TaARL1a-D	TraesCS3D02G179300.1	Information identified in this study
TaARL1b-D	TraesCS3D02G196200.1	Information identified in this study
TaARFA1d-D	TraesCS3D02G330500.2	Information identified in this study
TaARL1c-A	TraesCS4A02G045000.1	Information identified in this study
TaARFC1-A	TraesCS4A02G149200.1	Information identified in this study
TaARFC1-B	TraesCS4B02G164400.1	Information identified in this study
TaARL1c-B	TraesCS4B02G260300.1	Information identified in this study
TaARFC1-D	TraesCS4D02G152600.1	Information identified in this study
TaARL1c-D	TraesCS4D02G260100.1	Information identified in this study
TaTTN5c-A	TraesCS5A02G014900.1	Information identified in this study
TaARL1d-A	TraesCS5A02G089200.1	Information identified in this study
TaARFA1e-A	TraesCS5A02G142100.1	Information identified in this study
TaARFA1f-A	TraesCS5A02G467400.1	Information identified in this study
TaTTN5c-B	TraesCS5B02G013100.1	Information identified in this study
TaARL1d-B	TraesCS5B02G095200.1	Information identified in this study
TaARFA1e-B	TraesCS5B02G140900.1	Information identified in this study
TaARFA1f-B	TraesCS5B02G479100.1	Information identified in this study
TaTTN5c-D	TraesCS5D02G020800.1	Information identified in this study
TaARL1d-D	TraesCS5D02G101300.1	Information identified in this study
TaARFA1e-D	TraesCS5D02G150000.1	Information identified in this study
TaARFA1f-D	TraesCS5D02G480200.1	Information identified in this study
TaARFB1b-A	TraesCS6A02G086900.1	Information identified in this study
TaARFB1c-A	TraesCS6A02G268000.1	Information identified in this study
TaARL1e-A	TraesCS6A02G293900.1	Information identified in this study
TaARFB1d-B	TraesCS6B02G114900.1	Information identified in this study
TaARFB1c-B	TraesCS6B02G295200.1	Information identified in this study
TaARL1e-B	TraesCS6B02G324400.1	Information identified in this study
TaARFB1c-D	TraesCS6D02G246900.1	Information identified in this study
TaARL1e-D	TraesCS6D02G274800.1	Information identified in this study
TaARF3-A	TraesCS7A02G284000.1	Information identified in this study
TaARF3-B	TraesCS7B02G181400.1	Information identified in this study
TaARL1f-B	TraesCS7B02G236300.1	Information identified in this study
TaARF3-D	TraesCS7D02G282400.1	Information identified in this study
TaARL1g-D	TraesCS7D02G332100.1	Information identified in this study
TaARFB1e-N	TraesCSU02G019600.1	Information identified in this study
1 Muthamilarasan, M.; Mangu, V.R.; Zandkarimi, H.; Prasad, M.; Baisakh, N.Structure, organization and evolution of ADP-ribosylation factors in rice and foxtail millet, and their expression in rice.Scientific Reports.2016, 6, 24008. DOI:10.1038/srep24008.
2 Gebbie, L.K. Genes encoding ADP-ribosylation factors in Arabidopsis thaliana L. Heyn.; genome analysis and antisense suppression. Journal of Experimental Botany. 2005, 56(414):1079-1091.D0I:10.1093/jxb/eri099.
