# Supplementary material for: Genome-wide identification and expression analysis of ADP-ribosylation factors associated with biotic and abiotic stress in wheat (Triticum aestivum L.)
Source: PeerJ. 2021 Mar 2;9:e10963. doi: 10.7717/peerj.10963 (PMC7934654; doi:10.7717/peerj.10963)
Supplement: Supplemental Information 3 [file peerj-09-10963-s003.xlsx]

## Sheet: Sheet1
Table S3. List of 1:1:1 High Confidence syntenic triads identified in this study.
Number	A	B	D
1	TraesCS1A02G306200	TraesCS1B02G317000	TraesCS1D02G305900
2	TraesCS1A02G069400	TraesCS1B02G087700	TraesCS1D02G072000
3	TraesCS1A02G197800	TraesCS1B02G212500	TraesCS1D02G201300
4	TraesCS3A02G172900	TraesCS3B02G203800	TraesCS3D02G179300
5	TraesCS3A02G193800	TraesCS3B02G221700	TraesCS3D02G196200
6	TraesCS3A02G337300	TraesCS3B02G368600	TraesCS3D02G330500
7	TraesCS4A02G045000	TraesCS4B02G260300	TraesCS4D02G260100
8	TraesCS4A02G149200	TraesCS4B02G164400	TraesCS4D02G152600
9	TraesCS5A02G014900	TraesCS5B02G013100	TraesCS5D02G020800
10	TraesCS5A02G089200	TraesCS5B02G095200	TraesCS5D02G101300
11	TraesCS5A02G142100	TraesCS5B02G140900	TraesCS5D02G150000
12	TraesCS5A02G467400	TraesCS5B02G479100	TraesCS5D02G480200
13	TraesCS6A02G268000	TraesCS6B02G295200	TraesCS6D02G246900
14	TraesCS6A02G293900	TraesCS6B02G324400	TraesCS6D02G274800
15	TraesCS7A02G284000	TraesCS7B02G181400	TraesCS7D02G282400
