# Supplementary material for: Genome-wide identification and expression analysis of ADP-ribosylation factors associated with biotic and abiotic stress in wheat (Triticum aestivum L.)
Source: PeerJ. 2021 Mar 2;9:e10963. doi: 10.7717/peerj.10963 (PMC7934654; doi:10.7717/peerj.10963)
Supplement: Supplemental Information 4 [file peerj-09-10963-s004.xlsx]

## Sheet: Sheet1
Table S4. Annotation of putative of TaARF proteins identified by MEME.
Name	Domain	Logo	Width(aa)
Motif1	ARF	ERFVEAKDELHRLLNEDELANAVLLVFANKQDJPGAMSEAEJTDKLGLH	49
Motif2	ARF	KEMRILMLGLDNAGKTTJLYK	21
Motif3	ARF	PTIGFNVETVEYKNISFTVWD	21
Motif4	ARF	GGQDKIRPLWRHYFQNTDALIYVVDSADR	29
Motif5	unknown	KQRHWYIQSTCATRGEGLYEG	21
Motif6	unknown	MGLAFTKLFSRLFAK	15
Motif7	unknown	LDWLSNNJASK	11
Motif8	unknown	KLGEVVTT	8
Motif9	unknown	FKWMSQYI	8
Motif10	unknown	FTTGKGSVNJS	11
