# Supplementary material for: Genome-wide identification and expression analysis of ADP-ribosylation factors associated with biotic and abiotic stress in wheat (Triticum aestivum L.)
Source: PeerJ. 2021 Mar 2;9:e10963. doi: 10.7717/peerj.10963 (PMC7934654; doi:10.7717/peerj.10963)
Supplement: Supplemental Information 5 [file peerj-09-10963-s005.xlsx]

## Sheet: Sheet1
Table S5. Homologous gene pairs of TaARF genes.
NO.	Gene Name	Gene Name	Ka	Ks	Ka/Ks	Replicative type
1	TaARFA1c-D	TaARFA1a-B	0.0218021	0.821948	0.0265249	Segmental duplication
2	TaARFA1c-D	TaARFA1b-A	0.00238569	0.0247615	0.0963465	Segmental duplication
3	TaARFA1d-A	TaARFA1c-D	0.0233623	0.985863	0.0236973	Segmental duplication
4	TaARFA1e-A	TaARFA1a-A	0.0460987	0.970929	0.047479	Segmental duplication
5	TaARFA1e-A	TaARFA1b-A	0.0354517	0.937814	0.0378025	Segmental duplication
6	TaARFA1e-A	TaARFA1c-D	0.0379595	0.937814	0.0404766	Segmental duplication
7	TaARFA1e-A	TaARFA1d-A	0.0471789	0.953668	0.049471	Segmental duplication
8	TaARFA1e-A	TaARFA1d-B	0.0434043	1.05722	0.0410553	Segmental duplication
9	TaARFA1e-A	TaARFA1d-D	0.0434221	0.991191	0.043808	Segmental duplication
10	TaARFA1e-B	TaARFA1a-A	0.0436098	0.963085	0.0452813	Segmental duplication
11	TaARFA1e-B	TaARFA1c-D	0.0380061	0.851513	0.0446336	Segmental duplication
12	TaARFA1e-B	TaARFA1d-A	0.0446976	0.945967	0.0472507	Segmental duplication
13	TaARFA1e-B	TaARFA1d-B	0.0409295	1.04796	0.0390563	Segmental duplication
14	TaARFA1e-B	TaARFA1d-D	0.0409462	0.982972	0.0416556	Segmental duplication
15	TaARFA1e-B	TaARFA1e-A	0	0.0242282	0	Segmental duplication
16	TaARFA1e-B	TaARFA1f-A	0.0372671	0.652441	0.0571195	Segmental duplication
17	TaARFA1e-D	TaARFA1a-A	0.0464129	1.02896	0.0451067	Segmental duplication
18	TaARFA1e-D	TaARFA1a-B	0.0564568	1.0422	0.0541706	Segmental duplication
19	TaARFA1e-D	TaARFA1b-A	0.0354228	0.915012	0.0387129	Segmental duplication
20	TaARFA1e-D	TaARFA1d-A	0.0507074	0.987062	0.0513721	Segmental duplication
21	TaARFA1e-D	TaARFA1d-B	0.0433688	0.999569	0.0433875	Segmental duplication
22	TaARFA1e-D	TaARFA1e-A	0.00480002	0.0582009	0.0824732	Segmental duplication
23	TaARFA1e-D	TaARFA1e-B	0.00480578	0.066618	0.0721394	Segmental duplication
24	TaARFA1e-D	TaARFA1f-B	0.0422358	0.719573	0.0586957	Segmental duplication
25	TaARFA1f-B	TaARFA1e-A	0.0372214	0.716368	0.0519585	Segmental duplication
26	TaARFA1f-D	TaARFA1c-D	0.0148729	0.573908	0.0259151	Segmental duplication
27	TaARFA1f-D	TaARFA1f-A	0.00413794	0.0205024	0.201827	Segmental duplication
28	TaARFA1f-D	TaARFA1e-B	0.0347521	0.671652	0.0517412	Segmental duplication
29	TaARFA1f-D	TaARFA1e-D	0.0397091	0.698976	0.0568104	Segmental duplication
30	TaARFB1a-D	TaARFB1a-A	0	0.0305386	0	Segmental duplication
31	TaARFB1c-A	TaARFB1a-D	0.065194	1.80696	0.0360795	Segmental duplication
32	TaARFB1c-D	TaARFB1a-A	0.0700806	2.03578	0.0344244	Segmental duplication
33	TaARFB1c-D	TaARFB1a-B	0.0700806	1.75343	0.0399678	Segmental duplication
34	TaARFB1c-D	TaARFB1c-A	0.00226586	0.0076727	0.295315	Segmental duplication
35	TaARFC1-B	TaARFC1-A	0.0118932	0.0910835	0.130575	Segmental duplication
36	TaARFC1-D	TaARFC1-A	0.00711468	0.0650815	0.10932	Segmental duplication
37	TaARFC1-D	TaARFC1-B	0.00950696	0.0734782	0.129385	Segmental duplication
38	TaARL1b-A	TaARL1a-A	0.0506752	0.890797	0.0568875	Segmental duplication
39	TaARL1b-B	TaARL1a-A	0.0506554	0.802323	0.063136	Segmental duplication
40	TaARL1b-B	TaARL1b-A	0	0.045526	0	Segmental duplication
41	TaARL1b-B	TaARL1a-B	0.0482782	0.777954	0.0620579	Segmental duplication
42	TaARL1b-D	TaARL1a-A	0.0530781	0.846238	0.0627224	Segmental duplication
43	TaARL1b-D	TaARL1b-A	0.00225989	0.045526	0.0496395	Segmental duplication
44	TaARL1b-D	TaARL1b-B	0.00225904	0.0300792	0.0751029	Segmental duplication
45	TaARL1c-B	TaARL1c-A	0	0.0883373	0	Segmental duplication
46	TaARL1c-D	TaARL1c-A	0	0.0699196	0	Segmental duplication
47	TaARL1c-D	TaARL1c-B	0	0.0517447	0	Segmental duplication
48	TaARL1d-A	TaARL1a-A	0.0429103	1.1451	0.0374731	Segmental duplication
49	TaARL1d-A	TaARL1b-A	0.033358	1.6332	0.0204249	Segmental duplication
50	TaARL1d-A	TaARL1b-B	0.0333452	1.4641	0.0227753	Segmental duplication
51	TaARL1d-A	TaARL1b-D	0.0357005	1.51842	0.0235116	Segmental duplication
52	TaARL1d-B	TaARL1a-A	0.0489019	1.06459	0.045935	Segmental duplication
53	TaARL1d-B	TaARL1b-D	0.0416212	1.43834	0.0289369	Segmental duplication
54	TaARL1d-B	TaARL1d-A	0.00449945	0.0228734	0.196711	Segmental duplication
55	TaARL1d-D	TaARL1a-A	0.0464455	1.07335	0.0432713	Segmental duplication
56	TaARL1d-D	TaARL1b-B	0.0368384	1.45478	0.0253223	Segmental duplication
57	TaARL1e-B	TaARL1e-A	0.0134448	0.0641208	0.209679	Segmental duplication
58	TaARL1e-D	TaARL1e-A	0	0.0476982	0	Segmental duplication
59	TaARL1g-D	TaARL1f-B	0.0182519	0.0696376	0.262098	Segmental duplication
60	TaGB1a-B	TaGB1a-A	0.00433527	0.0284394	0.152439	Segmental duplication
61	TaGB1a-D	TaGB1a-A	0.00215208	0.0356362	0.0603904	Segmental duplication
62	TaGB1a-D	TaGB1a-B	0.00651234	0.0504998	0.128958	Segmental duplication
63	TaGB1b-B	TaGB1a-A	0.0129202	0.117356	0.110094	Segmental duplication
64	TaGB1b-B	TaGB1a-B	0.0130099	0.107971	0.120495	Segmental duplication
65	TaGB1b-B	TaGB1a-D	0.0155312	0.107647	0.144279	Segmental duplication
66	TaGB1c-D	TaGB1a-A	0.0358143	0.0913676	0.391981	Segmental duplication
67	TaGB1c-D	TaGB1a-B	0.0337262	0.0997637	0.338061	Segmental duplication
68	TaGB1c-D	TaGB1a-D	0.0381106	0.0833138	0.457434	Segmental duplication
69	TaTTN5b-D	TaTTN5a-A	0.0165491	0.0570928	0.289864	Segmental duplication
70	TaTTN5c-A	TaTTN5b-D	0.00939715	0.157554	0.0596441	Segmental duplication
71	TaTTN5c-B	TaTTN5a-A	0.0129618	0.212488	0.0610003	Segmental duplication
72	TaTTN5c-D	TaTTN5a-A	0.00704506	0.227984	0.0309016	Segmental duplication
73	TaTTN5c-D	TaTTN5b-D	0.00939715	0.177292	0.0530039	Segmental duplication
74	TaTTN5c-D	TaTTN5c-A	0	0.197861	0	Segmental duplication
75	TaTTN5c-D	TaTTN5c-B	0.0046802	0.129259	0.036208	Segmental duplication
