# Supplementary material for: Genome-wide identification and expression analysis of ADP-ribosylation factors associated with biotic and abiotic stress in wheat (Triticum aestivum L.)
Source: PeerJ. 2021 Mar 2;9:e10963. doi: 10.7717/peerj.10963 (PMC7934654; doi:10.7717/peerj.10963)
Supplement: Supplemental Information 6 [file peerj-09-10963-s006.xlsx]

## Sheet: Sheet1
Table S6. Homologous gene pairs of ARF genes between wheat and four representative plants.
NO.	Gene ID	Gene ID	Ka	Ks	Ka/Ks
1	TraesCS5D02G480200.1	AT1G10630.1	0.0205617	1.63989	0.0125384
2	TraesCS5D02G150000.1	AT1G10630.1	0.0304116	2.5275	0.0120323
3	TraesCS5B02G479100.1	AT1G10630.1	0.0230182	1.71543	0.0134183
4	TraesCS5B02G140900.1	AT1G10630.1	0.0279895	2.08196	0.0134438
5	TraesCS5A02G467400.1	AT1G10630.1	0.0205617	1.63989	0.0125384
6	TraesCS5A02G142100.1	AT1G10630.1	0.0279554	2.12896	0.0131311
7	TraesCS3D02G330500.2	AT1G10630.1	0.0217319	2.53778	0.00856334
8	TraesCS3B02G368600.1	AT1G10630.1	0.0217232	3.39134	0.00640548
9	TraesCS3A02G337300.1	AT1G10630.1	0.0278539	2.49153	0.0111794
10	TraesCS2D02G244900.1	AT1G10630.1	0.0266479	1.58546	0.0168077
11	TraesCS2A02G235500.1	AT1G10630.1	0.0241859	1.4064	0.017197
12	TraesCS1B02G317000.1	AT1G10630.1	0.0267127	1.68094	0.0158915
13	TraesCS1A02G306200.1	AT1G10630.1	0.0242592	1.66834	0.0145409
14	TraesCS5D02G480200.1	AT1G23490.1	0.0267073	1.37633	0.0194047
15	TraesCS5D02G150000.1	AT1G23490.1	0.0435438	2.29977	0.0189339
16	TraesCS5B02G479100.1	AT1G23490.1	0.029183	1.42876	0.0204255
17	TraesCS5B02G140900.1	AT1G23490.1	0.0411062	1.94825	0.021099
18	TraesCS5A02G467400.1	AT1G23490.1	0.0267073	1.37633	0.0194047
19	TraesCS5A02G142100.1	AT1G23490.1	0.0435794	1.88053	0.023174
20	TraesCS3D02G330500.2	AT1G23490.1	0.0291063	1.46763	0.0198322
21	TraesCS3B02G368600.1	AT1G23490.1	0.0290946	1.75289	0.016598
22	TraesCS3A02G337300.1	AT1G23490.1	0.0340346	1.61198	0.0211135
23	TraesCS2D02G244900.1	AT1G23490.1	0.0266372	2.35162	0.0113272
24	TraesCS2A02G235500.1	AT1G23490.1	0.0241761	1.93191	0.0125141
25	TraesCS1B02G317000.1	AT1G23490.1	0.030004	1.11107	0.0270046
26	TraesCS5D02G480200.1	AT1G70490.1	0.0279951	1.16037	0.024126
27	TraesCS5D02G150000.1	AT1G70490.1	0.0448904	1.57689	0.0284676
28	TraesCS5B02G479100.1	AT1G70490.1	0.0304796	1.19909	0.025419
29	TraesCS5B02G140900.1	AT1G70490.1	0.0449827	1.32603	0.0339228
30	TraesCS5A02G467400.1	AT1G70490.1	0.0279951	1.16037	0.024126
31	TraesCS5A02G142100.1	AT1G70490.1	0.0449273	1.34081	0.0335075
32	TraesCS3B02G368600.1	AT1G70490.1	0.0279102	1.22973	0.0226962
33	TraesCS3A02G337300.1	AT1G70490.1	0.032852	1.23609	0.0265774
34	TraesCS2D02G244900.1	AT1G70490.1	0.0299858	1.3701	0.0218858
35	TraesCS2A02G235500.1	AT1G70490.1	0.0275093	1.23249	0.0223202
36	TraesCS1B02G317000.1	AT1G70490.1	0.0304734	1.05648	0.0288442
37	TraesCS1A02G306200.1	AT1G70490.1	0.0280065	1.08519	0.0258079
38	TraesCS5D02G480200.1	AT2G47170.1	0.0271083	1.27848	0.0212036
39	TraesCS5D02G150000.1	AT2G47170.1	0.0378668	1.94219	0.0194969
40	TraesCS5B02G479100.1	AT2G47170.1	0.0295844	1.23525	0.0239502
41	TraesCS5B02G140900.1	AT2G47170.1	0.0354373	1.98892	0.0178173
42	TraesCS5A02G467400.1	AT2G47170.1	0.0271083	1.27848	0.0212036
43	TraesCS3D02G330500.2	AT2G47170.1	0.0295067	1.46421	0.020152
44	TraesCS3B02G368600.1	AT2G47170.1	0.0294948	1.225	0.0240773
45	TraesCS3A02G337300.1	AT2G47170.1	0.0344353	1.37039	0.025128
46	TraesCS2D02G244900.1	AT2G47170.1	0.0241664	1.36556	0.0176971
47	TraesCS2A02G235500.1	AT2G47170.1	0.0217144	1.31676	0.0164908
48	TraesCS1B02G317000.1	AT2G47170.1	0.0316477	1.43749	0.0220159
49	TraesCS1A02G306200.1	AT2G47170.1	0.029183	1.61241	0.018099
50	TraesCS5D02G150000.1	AT3G62290.1	0.0428426	0	NaN
51	TraesCS5B02G140900.1	AT3G62290.1	0.0404097	0	NaN
52	TraesCS3D02G330500.2	AT3G62290.1	0.0331859	2.15558	0.0153953
53	TraesCS3A02G337300.1	AT3G62290.1	0.0393786	2.74255	0.0143584
54	TraesCS2D02G244900.1	AT3G62290.1	0.0327722	1.46354	0.0223924
55	TraesCS2A02G235500.1	AT3G62290.1	0.0302949	1.58883	0.0190674
56	TraesCS1B02G317000.1	AT3G62290.1	0.032852	1.6122	0.0203771
57	TraesCS5D02G480200.1	AT5G14670.1	0.0283396	2.77446	0.0102145
58	TraesCS5B02G479100.1	AT5G14670.1	0.0283396	2.77446	0.0102145
59	TraesCS5B02G140900.1	AT5G14670.1	0.0567906	1.67879	0.0338283
60	TraesCS5A02G467400.1	AT5G14670.1	0.0279271	2.54184	0.010987
61	TraesCS3D02G330500.2	AT5G14670.1	0.0278539	1.63979	0.0169862
62	TraesCS3B02G368600.1	AT5G14670.1	0.0278426	1.64792	0.0168956
63	TraesCS3A02G337300.1	AT5G14670.1	0.0301366	1.69409	0.0177893
64	TraesCS2A02G235500.1	AT5G14670.1	0.0402945	3.18586	0.0126479
65	TraesCS1B02G317000.1	AT5G14670.1	0.0353571	4.02498	0.0087844
66	TraesCS1A02G306200.1	AT5G14670.1	0.0380732	0	NaN
67	TraesCS6A02G293900.1	AT5G37680.1	0.0514382	2.56305	0.0200691
68	TraesCS5D02G101300.1	LOC_Os01g15010.1	0.0357623	0.995723	0.0359159
69	TraesCS5A02G089200.1	LOC_Os01g15010.1	0.032263	1.03056	0.0313062
70	TraesCS3D02G196200.1	LOC_Os01g15010.1	0.038284	0.847138	0.0451921
71	TraesCS3B02G221700.1	LOC_Os01g15010.1	0.0359073	0.847138	0.0423866
72	TraesCS3B02G203800.1	LOC_Os01g15010.1	0.0265566	0.446285	0.0595059
73	TraesCS3A02G193800.1	LOC_Os01g15010.1	0.0359211	0.91601	0.0392148
74	TraesCS3A02G172900.1	LOC_Os01g15010.1	0.0265361	0.44776	0.0592642
75	TraesCS5D02G480200.1	LOC_Os01g16030.1	0.00958288	1.21732	0.00787213
76	TraesCS5B02G479100.1	LOC_Os01g16030.1	0.00717566	1.25973	0.00569618
77	TraesCS5B02G140900.1	LOC_Os01g16030.1	0.0454405	1.18512	0.0383425
78	TraesCS5A02G467400.1	LOC_Os01g16030.1	0.00717566	1.21732	0.00589465
79	TraesCS5A02G142100.1	LOC_Os01g16030.1	0.047918	1.12072	0.0427564
80	TraesCS3D02G330500.2	LOC_Os01g16030.1	0.0168074	1.20299	0.0139714
81	TraesCS3B02G368600.1	LOC_Os01g16030.1	0.0168007	1.24934	0.0134476
82	TraesCS3A02G337300.1	LOC_Os01g16030.1	0.0167238	1.22147	0.0136915
83	TraesCS2D02G244900.1	LOC_Os01g16030.1	0.0290476	1.28941	0.0225278
84	TraesCS2A02G235500.1	LOC_Os01g16030.1	0.0265835	1.33667	0.0198879
85	TraesCS5D02G101300.1	LOC_Os01g23620.1	0.0297522	1.37444	0.0216468
86	TraesCS5B02G095200.1	LOC_Os01g23620.1	0.0321273	1.31541	0.0244238
87	TraesCS5A02G089200.1	LOC_Os01g23620.1	0.0262884	1.43192	0.0183588
88	TraesCS3D02G196200.1	LOC_Os01g23620.1	0.0159369	0.44047	0.0361815
89	TraesCS3B02G221700.1	LOC_Os01g23620.1	0.0136393	0.453908	0.0300486
90	TraesCS3B02G203800.1	LOC_Os01g23620.1	0.053047	0.804959	0.0659002
91	TraesCS3A02G193800.1	LOC_Os01g23620.1	0.0136445	0.480698	0.0283848
92	TraesCS3A02G172900.1	LOC_Os01g23620.1	0.0554326	0.830417	0.0667528
93	TraesCS5D02G480200.1	LOC_Os01g59790.2	0.00960397	0.756433	0.0126964
94	TraesCS5D02G150000.1	LOC_Os01g59790.2	0.0404014	1.18317	0.0341467
95	TraesCS5B02G479100.1	LOC_Os01g59790.2	0.0120243	0.734613	0.0163682
96	TraesCS5B02G140900.1	LOC_Os01g59790.2	0.0379673	1.20307	0.0315587
97	TraesCS5A02G142100.1	LOC_Os01g59790.2	0.0404345	1.2152	0.033274
98	TraesCS3D02G330500.2	LOC_Os01g59790.2	0.00238332	0.487474	0.00488912
99	TraesCS3B02G368600.1	LOC_Os01g59790.2	0.00238237	0.472924	0.00503754
100	TraesCS3A02G337300.1	LOC_Os01g59790.2	0.00836662	0.422271	0.0198134
101	TraesCS2D02G244900.1	LOC_Os01g59790.2	0.0168445	0.946478	0.017797
102	TraesCS2A02G235500.1	LOC_Os01g59790.2	0.0144149	0.946478	0.01523
103	TraesCS6A02G086900.1	LOC_Os02g03610.1	0.0443709	0.555898	0.0798185
104	TraesCS5B02G013100.1	LOC_Os02g22140.1	0.0481803	1.7818	0.0270403
105	TraesCS5A02G014900.1	LOC_Os02g22140.1	0.0481997	1.77222	0.0271973
106	TraesCS1D02G429700.1	LOC_Os02g22140.1	0.0557269	1.28824	0.0432582
107	TraesCS1A02G421700.1	LOC_Os02g22140.1	0.0495249	1.29671	0.0381929
108	TraesCS6D02G246900.1	LOC_Os02g47110.2	0.0265005	0.371784	0.0712792
109	TraesCS6A02G268000.1	LOC_Os02g47110.2	0.0241771	0.370567	0.0652435
110	TraesCS1D02G201300.1	LOC_Os02g47110.2	0.0727192	2.37745	0.030587
111	TraesCS1B02G212500.1	LOC_Os02g47110.2	0.0751971	2.23419	0.0336574
112	TraesCS1A02G197800.1	LOC_Os02g47110.2	0.0751971	2.90765	0.0258618
113	TraesCS6D02G274800.1	LOC_Os02g49980.1	0.0278146	0.467288	0.0595233
114	TraesCS6B02G324400.1	LOC_Os02g49980.1	0.0433939	0.504284	0.0860504
115	TraesCS6A02G293900.1	LOC_Os02g49980.1	0.027781	0.441608	0.0629087
116	TraesCS4D02G260100.1	LOC_Os03g10370.1	0.00932232	0.535087	0.0174221
117	TraesCS3D02G330500.2	LOC_Os03g59740.1	0.120048	0.891339	0.134683
118	TraesCS3B02G368600.1	LOC_Os03g59740.1	0.119996	0.920218	0.1304
119	TraesCS3A02G337300.1	LOC_Os03g59740.1	0.120542	0.90331	0.133445
120	TraesCS2D02G244900.1	LOC_Os03g59740.1	0.126646	0.721274	0.175586
121	TraesCS2A02G235500.1	LOC_Os03g59740.1	0.123811	0.721274	0.171656
122	TraesCS1B02G317000.1	LOC_Os03g59740.1	0.132117	0.879279	0.150256
123	TraesCS1A02G306200.1	LOC_Os03g59740.1	0.143446	0.865146	0.165805
124	TraesCS5D02G480200.1	LOC_Os05g41060.1	0.0169157	0.647619	0.0261199
125	TraesCS5D02G150000.1	LOC_Os05g41060.1	0.0455244	1.06117	0.0429004
126	TraesCS5B02G479100.1	LOC_Os05g41060.1	0.0144757	0.666913	0.0217056
127	TraesCS5B02G140900.1	LOC_Os05g41060.1	0.0430799	1.01416	0.0424784
128	TraesCS5A02G467400.1	LOC_Os05g41060.1	0.0169157	0.62881	0.0269012
129	TraesCS5A02G142100.1	LOC_Os05g41060.1	0.0455618	1.02284	0.0445443
130	TraesCS3D02G330500.2	LOC_Os05g41060.1	0.00238711	0.531599	0.00449043
131	TraesCS3B02G368600.1	LOC_Os05g41060.1	0.00238616	0.484694	0.00492303
132	TraesCS3A02G337300.1	LOC_Os05g41060.1	0.00837998	0.478348	0.0175186
133	TraesCS2D02G244900.1	LOC_Os05g41060.1	0.0217626	0.856033	0.0254226
134	TraesCS2A02G235500.1	LOC_Os05g41060.1	0.0193131	0.856033	0.0225611
135	TraesCS1B02G317000.1	LOC_Os05g41060.1	0.00479331	0.327311	0.0146445
136	TraesCS1A02G306200.1	LOC_Os05g41060.1	0.00239426	0.314193	0.00762033
137	TraesCS7D02G332100.1	LOC_Os06g12090.1	0.168475	0.466911	0.360829
138	TraesCS7B02G236300.1	LOC_Os06g12090.1	0.169925	0.448378	0.378977
139	TraesCS3B02G203800.1	LOC_Os06g12090.1	0.142279	0.508339	0.27989
140	TraesCS3A02G172900.1	LOC_Os06g12090.1	0.14216	0.524145	0.271222
141	TraesCS2D02G172000.1	LOC_Os07g42820.1	0.118005	0.503415	0.23441
142	TraesCS1B02G087700.1	LOC_Os07g42820.1	0.0856933	0.491118	0.174486
143	TraesCS1A02G069400.1	LOC_Os07g42820.1	0.0851737	0.516812	0.164806
144	TraesCS6D02G246900.1	LOC_Os10g42940.1	0.0651811	1.73167	0.0376406
145	TraesCS1D02G201300.1	LOC_Os10g42940.1	0.0114791	0.662686	0.0173221
146	TraesCS1B02G212500.1	LOC_Os10g42940.1	0.0114747	0.682334	0.0168168
147	TraesCS1A02G197800.1	LOC_Os10g42940.1	0.0114747	0.740147	0.0155033
148	TraesCS4D02G152600.1	LOC_Os11g37640.1	0.0302034	0.548833	0.055032
149	TraesCS4A02G149200.1	LOC_Os11g37640.1	0.0301791	0.489109	0.0617022
150	TraesCS5D02G101300.1	LOC_Os12g37360.1	0.0113188	0.459362	0.0246403
151	TraesCS5B02G095200.1	LOC_Os12g37360.1	0.0136187	0.404181	0.0336945
152	TraesCS5A02G089200.1	LOC_Os12g37360.1	0.0136187	0.417043	0.0326553
153	TraesCS3B02G221700.1	LOC_Os12g37360.1	0.0310866	1.88423	0.0164983
154	TraesCS3B02G203800.1	LOC_Os12g37360.1	0.055552	0.963992	0.057627
155	TraesCS3A02G172900.1	LOC_Os12g37360.1	0.0555085	0.869199	0.0638617
156	TraesCS2D02G172000.1	AET1Gv20176000.1	0.0381106	0.0833138	0.457434
157	TraesCS2B02G191100.1	AET1Gv20176000.1	0.0155312	0.107647	0.144279
158	TraesCS1D02G072000.1	AET1Gv20176000.1	0	0	NaN
159	TraesCS1A02G069400.1	AET1Gv20176000.1	0.00215208	0.0356362	0.0603904
160	TraesCS5D02G020800.1	AET1Gv20999700.1	0.00939715	0.177292	0.0530039
161	TraesCS5B02G013100.1	AET1Gv20999700.1	0.0141347	0.167605	0.0843335
162	TraesCS5A02G014900.1	AET1Gv20999700.1	0.00939715	0.157554	0.0596441
163	TraesCS1D02G429700.1	AET1Gv20999700.1	0	0	NaN
164	TraesCS1A02G421700.1	AET1Gv20999700.1	0.0519902	0.120337	0.43204
165	TraesCS5B02G140900.1	AET2Gv20549000.1	0.0380061	0.851513	0.0446336
166	TraesCS5A02G142100.1	AET2Gv20549000.1	0.0379595	0.937814	0.0404766
167	TraesCS4D02G152600.1	AET4Gv20337900.1	0	0.00782276	0
168	TraesCS4B02G164400.1	AET4Gv20337900.1	0.0095032	0.0650373	0.146119
169	TraesCS4A02G149200.1	AET4Gv20337900.1	0.00711187	0.0567072	0.125414
170	TraesCS4D02G260100.1	AET4Gv20644400.1	0	0	NaN
171	TraesCS4B02G260300.1	AET4Gv20644400.1	0	0.0517447	0
172	TraesCS4A02G045000.1	AET4Gv20644400.1	0	0.0699196	0
173	TraesCS5D02G020800.1	AET5Gv20040700.1	0	0.0323065	0
174	TraesCS5A02G014900.1	AET5Gv20040700.1	0	0.197861	0
175	TraesCS1D02G429700.1	AET5Gv20040700.1	0.00939715	0.177292	0.0530039
176	TraesCS5D02G150000.1	AET5Gv20370700.1	0.00479618	0.0162168	0.295753
177	TraesCS2D02G244900.1	AET5Gv20370700.1	0.0379286	0.942858	0.0402272
178	TraesCS2D02G244900.1	AET5Gv21083500.1	0.0148729	0.573908	0.0259151
179	TraesCS6B02G324400.1	AET6Gv20736800.1	0.0134618	0.0638536	0.210822
180	TraesCS6A02G293900.1	AET6Gv20736800.1	0	0.0476982	0
181	TraesCS7D02G332100.1	AET7Gv20831300.1	0	0	NaN
182	TraesCS7B02G236300.1	AET7Gv20831300.1	0.0182519	0.0696376	0.262098
183	TraesCS1A02G069400.1	TRIDC1BG012200.1	0.00433527	0.0212278	0.204226
184	TraesCS1A02G197800.1	TRIDC1BG035530.1	0	0.0228154	0
185	TraesCS1A02G421700.1	TRIDC5AG002340.1	0.0508219	0.267027	0.190325
186	TraesCS1A02G421700.1	TRIDC1AG062040.1	0.0326016	0.049198	0.662662
187	TraesCS1B02G087700.1	TRIDC1BG012200.1	0	0.0070094	0
188	TraesCS1B02G212500.1	TRIDC1BG035530.1	0	0	NaN
189	TraesCS1D02G072000.1	TRIDC1BG012200.1	0.00651234	0.043074	0.151189
190	TraesCS1D02G201300.1	TRIDC1BG035530.1	0	0.0227866	0
191	TraesCS1D02G429700.1	TRIDC5AG002340.1	0.00939715	0.157554	0.0596441
192	TraesCS1D02G429700.1	TRIDC1AG062040.1	0.0165491	0.0570928	0.289864
193	TraesCS2B02G191100.1	TRIDC1BG012200.1	0.0130099	0.117711	0.110524
194	TraesCS2D02G244900.1	TRIDC3BG054640.1	0.0172606	1.06102	0.0162679
195	TraesCS3A02G172900.1	TRIDC3BG031690.1	0.0506554	0.802323	0.063136
196	TraesCS3A02G172900.1	TRIDC3BG027900.1	0	0.0525215	0
197	TraesCS3A02G172900.1	TRIDC3AG023970.1	0	0	NaN
198	TraesCS3A02G193800.1	TRIDC3BG031690.1	0	0.045526	0
199	TraesCS3A02G193800.1	TRIDC3AG023970.1	0.0506752	0.890797	0.0568875
200	TraesCS3B02G203800.1	TRIDC5AG013650.1	0.0429435	1.24679	0.0344434
201	TraesCS3B02G203800.1	TRIDC3AG023970.1	0	0.0525215	0
202	TraesCS3B02G221700.1	TRIDC5AG013650.1	0.0333452	1.4641	0.0227753
203	TraesCS3B02G221700.1	TRIDC3BG031690.1	0	0	NaN
204	TraesCS3B02G221700.1	TRIDC3BG027900.1	0.0482782	0.777954	0.0620579
205	TraesCS3B02G221700.1	TRIDC3AG027470.1	0	0.045526	0
206	TraesCS3D02G196200.1	TRIDC3BG027900.1	0.050695	0.820318	0.0617991
207	TraesCS3D02G196200.1	TRIDC3AG023970.1	0.0530781	0.846238	0.0627224
208	TraesCS4A02G149200.1	TRIDC4BG025240.1	0.0118932	0.0910835	0.130575
209	TraesCS4A02G149200.1	TRIDC4AG023230.1	0.00473188	0	#NAME?
210	TraesCS4B02G164400.1	TRIDC4BG025240.1	0	0	NaN
211	TraesCS4B02G164400.1	TRIDC4AG023230.1	0.0118932	0.0910835	0.130575
212	TraesCS4B02G260300.1	TRIDC4BG044990.1	0	0.00836829	0
213	TraesCS4D02G152600.1	TRIDC4BG025240.1	0.00950696	0.0734782	0.129385
214	TraesCS4D02G152600.1	TRIDC4AG023230.1	0.00711468	0.0650815	0.10932
215	TraesCS5A02G014900.1	TRIDC5AG002340.1	0	0	NaN
216	TraesCS5A02G089200.1	TRIDC3BG031690.1	0.0333452	1.4641	0.0227753
217	TraesCS5A02G089200.1	TRIDC3BG027900.1	0.0429435	1.24679	0.0344434
218	TraesCS5A02G142100.1	TRIDC5BG071900.1	0.0372214	0.716368	0.0519585
219	TraesCS5A02G142100.1	TRIDC5AG023930.1	0	0	NaN
220	TraesCS5A02G142100.1	TRIDC2AG031930.1	0.0354517	0.937814	0.0378025
221	TraesCS5A02G467400.1	TRIDC5BG071900.1	0.00480386	0.0161297	0.297828
222	TraesCS5B02G013100.1	TRIDC5AG002340.1	0.0046802	0.187921	0.0249052
223	TraesCS5B02G013100.1	TRIDC1AG062040.1	0.0129618	0.212488	0.0610003
224	TraesCS5B02G095200.1	TRIDC3BG031690.1	0.0392473	1.43834	0.0272864
225	TraesCS5B02G095200.1	TRIDC3BG027900.1	0.0489399	1.15549	0.0423543
226	TraesCS5B02G095200.1	TRIDC3AG027470.1	0.0392624	1.60111	0.0245219
227	TraesCS5B02G095200.1	TRIDC3AG023970.1	0.0489019	1.06459	0.045935
228	TraesCS5B02G140900.1	TRIDC5AG023930.1	0	0.0242282	0
229	TraesCS5D02G020800.1	TRIDC5AG002340.1	0	0.197861	0
230	TraesCS5D02G020800.1	TRIDC1AG062040.1	0.00704506	0.227984	0.0309016
231	TraesCS5D02G101300.1	TRIDC3BG031690.1	0.0368384	1.45478	0.0253223
232	TraesCS5D02G101300.1	TRIDC3BG027900.1	0.0464815	1.16573	0.0398734
233	TraesCS5D02G101300.1	TRIDC3AG027470.1	0.0368525	1.62226	0.0227168
234	TraesCS5D02G150000.1	TRIDC5BG071900.1	0.0422358	0.719573	0.0586957
235	TraesCS6A02G293900.1	TRIDC6BG052410.1	0	0.0558026	0
236	TraesCS6A02G293900.1	TRIDC6AG044790.1	0	0.0234394	0
237	TraesCS6B02G295200.1	TRIDC6BG048130.1	0	0	NaN
238	TraesCS6B02G324400.1	TRIDC6BG052410.1	0.0134731	0.0215406	0.625474
239	TraesCS6B02G324400.1	TRIDC6AG044790.1	0.0134674	0.0551339	0.244268
240	TraesCS6D02G246900.1	TRIDC1BG035530.1	0.0700806	1.75343	0.0399678
241	TraesCS6D02G274800.1	TRIDC6BG052410.1	0	0.055581	0
242	TraesCS7B02G236300.1	TRIDC7AG048430.1	0.0252125	0.111315	0.226496
243	TraesCS7D02G332100.1	TRIDC7AG048430.1	0.0090807	0.110873	0.0819015
