# Supplementary material for: Genome-wide identification and expression analysis of ADP-ribosylation factors associated with biotic and abiotic stress in wheat (Triticum aestivum L.)
Source: PeerJ. 2021 Mar 2;9:e10963. doi: 10.7717/peerj.10963 (PMC7934654; doi:10.7717/peerj.10963)
Supplement: Supplemental Information 7 [file peerj-09-10963-s007.xlsx]

## Sheet: Sheet1
Table S7. Expression of ARF genes during wheat development.
	transcript	TaARFA1a-A	TaARFA1a-B	TaARFA1a-D	TaARFA1b-A	TaARFA1c-D	TaARFA1d-B	TaARFA1d-D	TaARFA1e-A	TaARFA1e-B	TaARFA1e-D	TaARFA1f-A	TaARFA1f-B	TaARFA1f-D	TaARFB1a-A	TaARFB1a-B	TaARFB1a-D	TaARFB1b-A	TaARFB1c-A	TaARFB1c-B	TaARFB1c-D	TaARFB1e-N	TaARFC1-A	TaARFC1-B	TaARFC1-D	TaARF3-A	TaARF3-B	TaARF3-D	TaARL1a-A	TaARL1a-B	TaARL1a-D	TaARL1b-A	TaARL1b-B	TaARL1b-D	TaARL1c-A	TaARL1c-B	TaARL1c-D	TaARL1d-A	TaARL1d-B	TaARL1d-D	TaARL1e-A	TaARL1e-B	TaARL1e-D	TaARL1f-B	TaARL1g-D	TaGB1a-A	TaGB1a-B	TaGB1a-D	TaGB1b-B
1	grain_dough-stage_endosperm	45.8397	80.118	162.998	2.42512	21.3045	48.5689	43.5004	16.4024	24.8329	24.583	75.409	110.676	63.6845	3.70167	4.79081	5.56525	1.70341	11.6618	13.3444	12.6807	3.3888	4.09619	6.41792	8.30488	1.57798	0.234567	0	18.6016	23.8167	1.53931	14.3427	7.34504	12.4932	1.71386	3.21562	2.99404	47.7619	24.8873	44.4731	31.0702	2.42636	28.3661	0.129467	0	5.54559	2.76164	4.88224	0.378912
2	grain_dough-stage_embryo	193.218	478.252	687.685	29.3379	88.1581	115.61	74.1687	121.673	150.349	181.778	80.4961	81.3283	68.0206	9.13097	11.8888	22.1169	7.31284	0.709602	1.31726	0.273499	6.34552	8.19131	11.6243	9.28138	9.66291	1.58509	1.31609	14.9359	17.6046	1.08982	17.1132	8.27861	19.8401	1.52347	3.26243	2.9759	56.2234	31.7725	67.6125	36.8469	3.66636	41.5235	0.0158986	0	6.10026	7.83564	6.37271	0.606339
3	grain_hard-dough_grain	117.026	240.782	374.095	14.4778	52.6197	96.4303	57.8339	62.201	72.1367	82.2035	131.105	139.517	123.03	7.84602	9.73228	15.067	8.43169	6.4383	7.49979	7.06117	6.67851	8.47808	13.5786	12.8308	5.26875	0.63644	1.24211	19.3315	21.7239	1.20606	21.2599	13.8959	21.8106	3.17776	6.74823	4.43413	46.0657	27.0193	50.8424	29.3435	0.883234	27.3488	0.0673434	0.1006	7.9319	7.54399	8.62562	0.608229
4	grain_grain-ripening-stage_grain	87.8852	211.524	317.395	12.1491	46.8771	109.241	52.8428	91.2106	91.1523	122.166	74.1554	66.9406	64.0127	6.13803	10.6255	17.3001	4.35222	3.76276	2.719	2.21765	5.12978	9.02646	9.70666	6.9604	5.48662	3.3334	0.462204	25.9632	18.8763	0.498681	14.2512	8.4049	16.7657	2.09147	5.27174	2.96709	57.4981	33.4201	72.0857	26.6579	2.34018	29.6425	0.262304	0.126849	5.65058	6.4903	4.89887	0.219348
5	grain_soft-dough_grain	69.166	122.49	247.361	5.03927	37.7623	80.2557	69.5316	24.9865	23.5571	20.6642	230.664	214.122	201.413	8.99984	11.2366	13.5064	4.13025	13.7287	11.3805	8.84666	7.13404	11.3098	17.0294	16.7164	4.40949	0.698892	1.25275	18.7573	25.6908	0.969751	23.6146	17.6139	23.1474	4.90113	10.0384	7.64794	42.5558	23.0878	38.3173	25.2696	2.35431	24.8047	0.0297957	0.0271535	9.74651	7.13285	8.43206	0.655518
6	grain_milk-grain-stage_grain	159.608	214.877	405.153	7.75944	62.4738	141.55	98.7927	44.0274	34.9768	32.6632	401.169	424.457	395.296	18.8428	16.7887	21.296	3.77634	13.4948	12.3995	7.6479	9.49466	21.1996	29.9632	33.3929	6.01522	0.841416	0.255754	29.6653	36.2534	0.283523	43.5555	34.0248	43.3551	9.94186	17.8887	14.5424	60.3835	31.5779	54.2313	28.9939	0.0288444	22.9619	0.0712872	0.0654521	17.2289	13.0932	17.5516	0.517075
7	spike_milk-grain-stage_lemma	175.722	299.724	497.801	21.5148	94.1035	112.727	69.9474	111.239	88.883	93.9837	116.661	131.265	114.005	11.4723	13.3669	18.312	3.36651	21.1942	23.9373	11.1748	10.7703	11.317	27.1122	17.3222	3.55986	1.08371	0	18.1437	28.4957	0.316591	32.1405	25.1703	33.648	11.8597	16.5383	14.3607	47.8228	36.7455	49.489	22.2283	1.65158	14.6122	0.0170831	0.0506636	15.537	15.3143	14.0417	0.315974
8	spike_milk-grain-stage_glumes	157.355	289.541	494.305	23.783	99.5582	108.031	69.7103	119.722	97.6409	100.891	131.144	135.989	128.464	10.7603	14.5026	15.3271	7.39853	16.2875	16.8852	6.00898	9.78402	11.1537	28.4714	17.4937	4.66278	1.35509	0.506373	13.084	23.4496	1.03533	27.5715	19.8805	33.4264	10.8161	14.9476	14.4117	49.1107	33.6313	49.7053	22.8767	1.37336	14.8346	0.0648533	0.0441237	13.5523	13.9224	12.5808	0.50513
9	spike_milk-grain-stage_awns	168.263	266.132	442.51	23.0776	99.3303	111.815	64.2296	157.132	143.77	125.398	124.336	131.577	115.183	9.36298	12.5104	14.2406	6.42603	16.9617	17.8807	8.475	11.1856	9.76724	28.5849	15.2894	5.01641	0	0	17.7329	25.5477	1.09546	29.2199	22.1466	29.6843	10.9006	15.4897	13.9184	44.4357	28.5114	44.197	24.0486	1.1543	13.0737	0.051732	0.0551471	14.5643	11.9532	13.6665	0.693878
10	spike_anthesis_stigma-ovary	153.791	257.212	456.018	14.866	114.828	166.12	99.9034	60.8213	43.1843	35.9733	346.57	410.654	357.586	29.1944	27.0738	32.507	12.1169	3.63102	4.68403	1.37889	17.4838	23.0534	40.4279	42.905	19.6273	1.35771	1.69692	32.9986	45.1467	1.37699	61.7906	50.2519	58.519	22.3643	30.4295	31.2283	38.0056	22.3394	47.9848	34.8744	1.79e-05	27.704	0.219625	0	20.7426	19.9296	19.0865	0.571697
11	spike_anthesis_anther	318.451	364.708	851.879	11.3803	98.3374	108.67	69.2305	65.8492	53.8698	55.1781	376.349	426.726	463.749	18.4131	15.1329	14.852	5.81891	9.47447	10.2723	5.99744	13.5415	34.6315	34.2853	39.0535	3.71481	2.7e-05	0	19.1397	24.5266	1.70886	48.221	42.7397	41.923	35.304	46.1854	49.8905	19.1957	11.242	17.6204	23.2478	2.20723	14.0509	1.12107	1.52459	18.5439	14.3552	15.8218	0.181798
12	spike_full-boot-stage_spike	198.983	309.425	541.005	38.8597	126.15	214.657	136.85	38.4245	20.5375	25.7078	399.855	465.753	440.306	18.8115	17.9433	19.619	6.13265	0.708434	1.4408	0.475909	11.7496	19.2983	41.3444	35.7666	20.0121	3.01581	0.313446	23.9823	39.0728	0.272932	73.8538	55.3982	67.0417	19.7302	26.9783	26.3348	49.5363	20.7439	51.3498	24.529	2.47329	18.8185	1.48191	0.86096	19.4488	19.3175	19.9667	0.0172873
13	spike_Ear-emergence_lemma	123.366	197.689	377.705	18.0999	90.8204	96.0451	59.7475	135.613	110.407	98.788	111.157	114.637	108.355	11.0645	15.032	18.0266	7.78341	11.229	12.1688	3.99864	12.2183	14.1914	29.2466	17.8024	4.36824	0	0.644052	17.2963	26.0659	1.18039	23.505	18.7924	29.1691	12.7712	18.7691	18.6686	60.1505	40.6671	54.2533	21.269	4.90289	17.32	0.223258	0.119373	13.4184	13.668	12.4444	0.390399
14	spike_Ear-emergence_glumes	106.681	202.213	359.966	20.0408	73.167	98.6477	58.8424	130.76	108.445	102.489	82.4928	99.3411	80.344	9.54289	12.1274	13.5744	3.43627	8.11043	7.27064	2.87235	10.6543	11.2228	28.3533	15.9313	3.08672	0	0.202491	12.0126	23.0737	0.730856	23.478	18.0533	23.3645	12.5474	19.16	15.9797	50.9355	32.2224	48.5913	20.0332	0.80994	13.1066	0.0566864	0.151955	12.247	11.1771	10.4418	0.0984356
15	spike_Ear-emergence_awns	92.1251	150.691	264.101	12.7976	56.8765	66.9164	38.2877	129.774	117.237	106.916	70.4252	72.4982	62.6547	6.10237	9.17367	8.55518	3.48146	5.64535	4.5755	2.64268	8.1868	5.69668	18.0616	10.3037	1.99566	0	0	12.1375	15.9858	0.721312	14.8863	10.8123	14.2928	7.7257	12.1922	10.0995	32.4025	17.0985	30.027	14.4361	1.49997	8.69462	0.0161849	0.0613386	8.05779	6.17458	7.60572	0.225767
16	spike_30%-spike-stage_spikelets	186.652	255.851	461.284	25.1416	103.15	187.803	106.223	60.9083	40.7464	40.4258	271.643	313.425	280.273	15.6345	14.5268	18.9947	6.08218	2.112	2.74423	1.50659	14.3299	18.3517	36.5474	30.6029	13.2194	1.45305	1.06592	18.9594	30.5942	0.682253	54.3389	40.4381	49.1911	18.4793	25.9294	22.624	65.4473	29.6143	60.1435	20.8676	0.708348	14.4057	0.0176215	0.0423451	18.6436	15.3024	17.54	0.342946
17	spike_30%-spike-stage_spike	185.128	270.669	488.82	26.0529	113.528	197.271	110.292	52.9822	33.0835	31.8182	278.178	338.427	290.594	15.6254	15.464	18.0029	6.35148	2.03265	2.51556	1.37093	13.6785	15.2692	36.5285	30.0633	14.7495	1.14519	0.91584	16.9282	30.5925	0.262604	59.5657	44.9384	54.4157	18.3053	27.1333	24.5922	63.4462	28.0551	56.3659	20.1931	0.121368	15.2052	0.0557985	0.108529	19.5316	16.9126	17.1795	0.467055
18	leaves-shoots_dough-stage_flag-leaf-blade(senescence)	148.87	264.961	436.603	23.5939	95.7362	95.5065	54.8937	154.635	155.13	130.236	97.4126	99.3509	94.8021	7.00362	11.881	15.4753	4.50888	16.5527	14.7908	10.2975	10.7416	8.12078	25.4174	13.7285	2.62689	0	0.591199	15.3084	26.8043	0.462893	30.0219	21.8421	27.3132	10.1798	15.701	13.225	40.863	26.9468	41.9222	25.944	0	13.7329	0	0.0190419	14.8503	13.2935	13.9691	0.509604
19	leaves-shoots_grain-ripening-stage_flag-leaf-blade(senescence)	141.557	203.116	375.316	27.0781	90.1391	115.346	62.4002	152.083	155.515	126.509	117.745	127.999	105.226	12.3147	16.8231	12.5368	6.03115	17.3786	18.8131	13.0625	12.9132	9.95905	27.4807	15.8439	2.85616	0.964517	1.13173	31.6662	47.3048	2.12914	34.5843	28.3428	35.3715	11.9546	19.2277	18.4248	47.6392	32.3649	45.4382	47.6536	1.2e-05	27.0976	0.0111838	0.0228322	19.1008	14.7377	19.9268	1.44387
20	leaves-shoots_milk-grain-stage_shoot-axis	195.188	362.797	661.305	48.1615	128.151	180.048	118.744	167.874	151.91	130.266	346.838	436.981	351.627	21.9797	24.4875	24.1825	9.91428	10.2889	12.0132	8.89346	24.1988	16.4737	35.775	27.2262	8.4984	1.18305	1.59574	25.8609	47.815	0.279397	39.168	28.8996	48.0283	14.5968	20.2663	17.0531	88.3743	47.259	78.2835	21.7761	1.1552	15.6072	0.142244	0.0620042	18.2747	15.732	17.5854	0.474223
21	leaves-shoots_milk-grain-stage_peduncle	151.684	250.658	392.195	36.7643	107.218	107.511	74.3556	127.042	140.459	104.628	95.1879	104.699	100.098	10.7855	15.2293	16.9408	9.80448	7.57998	6.22216	3.70176	15.3064	13.8706	34.0614	20.6386	6.33603	0.556105	0.407677	14.9801	25.4773	0.992511	24.3228	19.1294	28.8209	13.3003	19.3749	14.786	63.8232	35.6647	66.9527	21.0078	1.3555	15.9528	0.0170578	0.0348193	15.3093	12.0746	16.1572	0.48095
22	leaves-shoots_milk-grain-stage_internode2	166.117	322.803	498.524	48.0102	112.672	145.282	85.7752	137.911	124.467	115.677	208.983	235.682	211.455	14.2365	21.7738	21.1953	10.148	15.0511	16.3072	10.95	17.1094	15.465	39.5894	26.204	4.56771	0.850612	0.155513	18.9882	29.458	0	32.8056	30.0422	38.171	12.7953	20.3299	14.2605	73.0186	44.9709	70.2554	24.0297	3.06409	15.9599	0.142911	0.0615215	19.4982	15.4787	16.017	1.58448
23	leaves-shoots_milk-grain-stage_flag-leaf-sheath	212.783	343.092	575.846	29.9549	121.987	132.422	75.5377	154.958	152.868	122.25	148.807	145.8	129.303	8.94405	16.5775	20.0377	5.75181	23.9301	17.9082	17.5695	11.5229	13.5142	30.3231	18.9033	3.0784	0.292973	0.228292	21.5346	32.6097	0.738193	39.8109	29.8598	37.6076	9.98277	14.9892	12.4769	54.5933	37.1327	57.2481	27.5232	7.45e-09	15.4734	0.0362156	0	22.1882	17.1172	19.387	1.46916
24	leaves-shoots_milk-grain-stage_flag-leaf-blade	187.717	283.693	560.416	25.0096	93.7695	98.0225	67.4431	141.916	138.595	116.747	129.864	170.484	122.973	11.4632	15.822	21.2008	7.54992	19.9395	19.5352	16.8508	10.3	14.4812	29.2021	21.4387	5.28041	0	0.183773	18.1881	32.3807	0.787286	37.5606	28.0032	37.44	10.757	18.3226	15.0044	49.112	34.2288	48.8546	30.3869	11.2119	14.9685	0.139418	0	26.0976	22.6722	21.7255	2.22493
25	leaves-shoots_milk-grain-stage_fifth-leaf-blade(senescence)	198.034	287.663	510.557	26.176	104.569	122.182	67.3556	169.397	157.862	135.434	166.643	159.168	151.697	12.7347	14.11	16.5208	4.07473	20.6751	18.0015	15.7709	10.0343	12.7573	33.3386	20.0492	4.375	0.154561	0	17.1477	28.9909	0.25021	41.8373	31.7754	37.634	12.5579	19.5808	16.2854	48.0129	33.7745	50.7249	33.8074	1.0639	18.7918	0	0	23.294	18.8127	21.0453	2.04539
26	leaves-shoots_anthesis_flag-leaf-blade-night(-0.25h)	100.402	192.896	317.923	27.2035	114.816	88.3196	49.718	230.511	207.161	178.957	114.007	118.969	109.523	10.5273	14.142	12.5419	7.08312	13.954	14.2068	11.3371	11.2623	11.2666	42.8316	19.3092	3.74247	0	0.302716	8.7122	12.3402	0.401811	32.3858	23.927	30.7282	25.6615	37.0905	37.6652	53.6877	31.6993	57.4665	32.3041	2.6837	16.2197	0	0	16.1604	13.4179	13.9372	0.741034
27	leaves-shoots_anthesis_fifth-leaf-blade-night(-0.25h)	133.649	231.208	400.271	24.1891	108.507	87.7585	47.4686	260.239	248.414	227.774	90.0321	99.7783	86.5309	7.28311	10.7567	16.1809	3.55412	10.9748	9.22483	7.12044	10.1719	10.1018	31.7433	10.124	2.54387	0	0.458651	6.46323	9.522	0	30.5006	19.2214	25.0312	17.3126	25.145	19.637	64.4794	35.4567	58.3698	26.2713	2.73222	12.5241	0	0	14.0288	11.7306	11.0915	0.530416
28	leaves-shoots_full-boot-stage_shoot-axis	238.616	367.456	697.924	43.4933	155.318	219.044	150.583	107.547	86.0564	79.6409	445.257	597.391	487.746	20.1509	19.967	25.0166	8.19448	4.36174	4.99837	2.94346	12.5602	21.8217	46.5167	42.7389	19.5816	0.875967	0.85321	25.2416	37.0456	0.360403	68.0972	52.8235	70.5424	16.1308	21.905	21.2736	64.2101	29.9748	56.957	23.1936	6.14392	14.9472	0.067276	0.0198777	19.9328	19.1046	17.3453	1.13723
29	leaves-shoots_full-boot-stage_leaf-ligule	110.321	173.006	326.138	20.3429	91.6469	99.2024	52.0191	125.435	117.349	102.555	96.5851	102.706	91.4961	11.2142	14.0346	14.1124	6.39883	7.29762	6.64852	4.13969	11.2872	10.747	31.3108	16.0812	3.70966	0.587359	0.861279	18.7056	27.3304	1.49015	31.658	24.7521	29.7903	11.9437	19.1031	17.5232	42.9452	24.982	42.3001	22.4855	0	15.1695	0.0318085	0.0716376	14.568	11.8922	14.6752	0.885974
30	leaves-shoots_full-boot-stage_flag-leaf-sheath	79.5496	120.214	214.329	11.9724	71.0846	51.3082	30.9478	157.55	132.899	124.013	59.6718	61.127	48.3618	5.66539	9.48026	8.96291	4.37793	8.25633	7.43707	3.41229	8.80247	8.94853	21.6397	10.484	2.19342	0.553927	0.300427	13.0403	19.0552	0.717075	18.1417	15.0467	14.2851	10.4215	14.7672	13.5969	27.8389	17.5952	29.7478	18.5146	1.83903	11.9248	0.0339783	0.0662044	11.9632	8.58024	9.58301	0.510555
31	leaves-shoots_full-boot-stage_flag-leaf-blade	69.6913	108.047	205.774	12.3633	59.2004	44.0647	22.9128	165.538	168.303	131.255	33.1782	39.4919	32.771	6.33626	9.01536	6.61121	1.85593	5.70434	6.84313	3.06695	6.92111	5.47794	19.7566	7.87196	2.34391	0	0.533671	11.9229	13.8564	0.282311	13.5471	10.3473	11.1331	9.43278	13.4949	10.8185	22.433	13.2795	23.48	14.3167	0.906528	8.65382	0	0.0158493	8.22818	6.54697	7.42347	0.323534
32	leaves-shoots_Ear-emergence_peduncle	81.4117	129.904	224.731	17.9299	80.6291	61.0153	29.9666	76.7166	48.1774	58.1608	103.259	107.661	96.0624	8.13946	8.05878	12.2925	7.93365	2.3601	2.17784	0.773175	13.0747	9.51574	24.2325	16.2405	3.39501	0.577967	0.546383	7.69375	13.0775	0.47586	19.246	16.1339	19.9161	14.7717	18.3035	15.9812	71.2738	38.3461	73.764	14.786	0	11.4053	0.0195381	0.0750583	13.5568	6.87786	9.87801	0.540716
33	leaves-shoots_Ear-emergence_internode2	153.566	269.882	476.67	30.4683	87.321	120.902	71.4921	123.253	117.783	107.371	149.081	204.212	156.992	12.9211	16.8048	16.9303	5.58787	11.196	8.49641	6.37989	13.1118	11.8708	27.5561	15.7341	3.43955	0.72966	0.252233	16.0113	22.075	0.660383	23.7313	20.9992	29.1084	12.544	21.021	12.7676	67.1032	36.7281	60.9711	18.1588	3.29467	10.7492	0.0351881	0.0179481	13.3873	11.6823	13.0856	0.500587
34	leaves-shoots_Ear-emergence_flag-leaf-sheath	243.853	343.078	577.051	30.3456	124.12	154.261	89.9055	152.369	140.597	129.832	193.335	196.331	175.695	11.8696	16.9988	20.0765	4.22432	24.9229	18.9768	16.133	10.3412	14.0633	33.6525	19.6333	6.83851	0.556843	0.45963	24.7494	37.7099	0.67606	45.7189	35.6062	41.9756	11.1704	15.4584	13.9229	52.6744	36.9691	57.6145	25.3934	0.117656	15.6862	0.0483663	0.121109	27.0657	21.2117	25.1085	2.07297
35	leaves-shoots_Ear-emergence_flag-leaf-blade	170.692	225.368	402.954	19.1312	98.2104	92.6756	51.4152	156.112	148.377	119.17	110.952	120.707	106.033	8.27103	11.9585	12.1892	3.01919	14.4194	11.653	8.67697	9.0142	7.64431	23.8463	13.1101	2.76998	0.149566	0.34119	17.6125	23.2085	1.33595	30.5993	23.0221	26.8334	8.27353	13.8614	10.7897	37.6336	26.2084	40.1204	18.6724	0	10.1094	0	0.0177903	16.3125	12.7277	13.8195	1.04775
36	leaves-shoots_Ear-emergence_fifth-leaf-blade	171.678	237.765	431.44	19.1943	84.7733	97.3166	55.176	151.531	139.559	134.023	122.959	123.093	110.191	9.21963	11.5376	12.5259	3.2327	15.3024	13.3958	11.1381	8.06393	9.90617	25.328	14.0756	2.89427	0.174656	0.281403	16.7039	23.6848	0.125172	32.7892	25.5781	29.4558	9.07969	15.3817	12.7195	37.7546	25.1053	38.7253	23.5807	0.000373841	11.7327	0.0338193	0	17.673	13.3369	17.4891	1.05225
37	leaves-shoots_30%-spike-stage_peduncle	81.5755	121.751	222.321	17.5613	99.4919	79.7679	47.5442	75.3569	50.8566	51.3448	153.603	181.614	155.33	8.6146	8.12472	11.2904	5.61074	1.63553	2.01066	0.771091	9.60385	8.0824	24.278	18.1354	4.53674	0.297331	0	9.20692	17.1982	0.442501	25.4986	19.1856	22.4242	14.8353	17.4118	16.5015	58.9864	26.4431	53.0342	13.9302	0.750693	9.9573	0.0283556	0	10.5341	7.98284	9.62126	0
38	leaves-shoots_30%-spike-stage_internode2	168.008	287.877	487.751	29.1826	92.4978	127.265	80.6207	133.474	124.115	119.024	165.384	218.567	154.375	14.6408	20.0064	21.1869	6.96754	9.56558	9.1517	5.79756	14.6011	13.3333	30.3674	16.885	3.61715	0.502241	0.267241	14.9616	24.2207	0.370544	24.7416	19.6465	30.3296	15.4035	24.6439	17.8285	74.4591	42.0525	69.9196	17.1578	4.23264	11.7792	0.134392	0.0685817	15.7503	12.6618	13.7309	0.631041
39	leaves-shoots_30%-spike-stage_flag-leaf-sheath	121.941	182.233	334.449	19.7861	80.6766	73.4365	41.8437	146.401	143.435	128.668	70.0687	89.4091	74.9483	7.93493	11.7731	11.9946	2.96567	14.4608	10.8725	7.92682	8.77324	8.42862	23.2125	12.8615	2.48794	0	3.94e-08	13.8816	20.3482	0.204156	23.9922	18.2154	20.5861	11.4293	16.2233	13.0019	35.4859	24.0448	36.5485	18.2754	1.21519	11.9628	0.0305095	0.0144699	13.0859	11.3613	11.8293	0.824173
40	leaves-shoots_30%-spike-stage_flag-leaf-blade	116.001	153.017	306.502	14.3956	73.6299	61.3065	32.9696	153.496	164.59	127.562	51.3499	70.4965	51.7465	7.78454	10.4271	11.5487	3.67335	10.0843	9.68474	5.62221	7.33952	5.7779	21.8506	9.4332	2.84301	0.287894	0.180647	14.3753	19.0497	0.741134	17.2597	13.813	16.6703	9.92685	13.8743	11.8967	30.7883	19.9557	31.6074	15.6705	0.00553108	8.17108	0	0.0728211	11.8719	9.0375	9.12165	0.34039
41	leaves-shoots_flag-leaf-stage_shoot-axis	163.999	273.586	524.575	36.1187	126.589	164.195	107.484	89.4619	65.0027	70.3072	340.219	472.415	387.052	17.2027	19.457	23.0604	2.79182	2.30616	2.44617	1.52225	12.5124	17.2756	31.3082	29.0816	15.7825	1.80902	0.929197	19.7493	31.3605	1.3718	58.7309	43.2864	60.5026	15.0088	22.8959	21.0258	49.5011	26.2681	42.8826	20.0298	5.96764	13.4858	0	0.0550357	14.4146	15.6121	14.9209	1.28631
42	leaves-shoots_flag-leaf-stage_flag-leaf-blade-night(+0.25h)	47.7814	78.4478	136.923	9.62037	68.1651	26.2082	16.3078	112.553	90.2529	86.5431	42.6345	49.4033	39.7138	3.7346	5.35948	5.36745	4.1305	0.910688	1.22667	0.545126	6.2229	7.01802	21.8315	11.3779	0.911641	0	0.421323	3.90688	4.52925	0	10.6505	7.29005	8.71386	13.5183	19.0864	14.8198	23.5271	11.0632	20.8766	11.2237	0.609247	6.78076	0.0148765	0.304082	4.95718	4.20994	4.33453	0.0764047
43	leaves-shoots_flag-leaf-stage_flag-leaf-blade-night(-0.25h)	52.4914	88.5464	157.207	7.29088	56.8634	32.1886	16.7153	162.544	137.376	134.679	35.2826	42.0671	27.8878	3.5207	5.45263	5.69596	2.47633	1.95131	2.02211	1.13886	4.97755	5.68019	20.4343	8.49649	0.891253	0	0.058218	4.87802	5.39911	0	10.0254	7.42991	7.89951	10.4063	13.73	13.6545	24.035	10.0567	18.6083	12.3145	0.73267	6.3927	0.0163729	0.168065	5.61362	4.48438	4.58621	0
44	leaves-shoots_flag-leaf-stage_flag-leaf-blade	52.4929	74.2153	128.76	8.23877	53.5999	26.5322	12.4888	121.841	102.86	98.9419	21.4273	28.9554	21.3749	3.90644	5.79037	4.67682	3.39854	1.9002	2.09705	0.765122	5.18622	3.04226	12.6631	6.19195	1.07462	1.33e-08	0	6.09586	7.97385	0.508054	8.08023	6.88	7.0777	10.4618	13.981	12.9534	18.3228	9.63273	17.8122	8.69619	1.50303	5.82097	0.0124721	0.0754357	4.77282	3.84729	4.78289	0.385747
45	leaves-shoots_flag-leaf-stage_fifth-leaf-sheath	117.445	192.411	305.953	19.2243	103.014	94.0874	59.6231	100.121	73.2383	77.2167	181.719	209.929	180.61	10.3434	9.32345	10.6228	4.40152	6.53544	6.79528	3.0398	12.8788	10.9595	28.0279	17.8194	6.63943	1.62715	0.95068	12.5894	20.8013	0.437186	33.6479	27.5579	28.4058	16.1139	21.335	18.5403	60.2002	31.0995	52.3961	18.6931	2.26615	14.579	0	0	13.9917	11.141	12.334	0.59842
46	leaves-shoots_flag-leaf-stage_fifth-leaf-blade-night(+0.25h)	45.3843	85.4007	141.939	12.8365	60.3399	35.7315	19.8302	183.141	143.723	151.131	38.9469	45.7378	36.4566	4.03746	7.30171	5.58785	2.96366	3.65516	4.47016	2.34212	7.01958	6.03555	24.3403	12.4193	2.49516	0	0.511992	6.07281	7.47849	0.321722	12.8917	9.76574	11.2329	13.4754	19.0322	18.486	21.6132	12.7385	22.9553	16.1116	0.00208824	8.59781	0	0	8.07769	7.08014	7.05613	0.419524
47	leaves-shoots_flag-leaf-stage_fifth-leaf-blade-night(-0.25h)	46.5292	87.1181	159.619	12.9936	61.2538	34.9834	21.2515	156.27	153.299	155.321	36.4367	50.1741	38.6273	4.92989	7.18253	5.73451	4.20952	5.27465	7.49147	3.10761	7.21124	6.29953	22.3952	11.5519	2.32927	0.240255	0	7.31674	9.00406	0.44076	12.9369	12.3673	12.8841	14.4285	21.2427	20.2474	18.9426	12.3063	21.3122	15.7337	1.3413	8.32376	0	0	7.74395	6.51585	6.91055	0.704117
48	leaves-shoots_flag-leaf-stage_fifth-leaf-blade	85.392	113.696	217.588	12.1652	58.1386	41.8962	23.3105	175.191	167.386	147	31.4973	47.2816	35.3043	5.87769	8.3859	6.98938	3.85759	5.63716	5.26845	3.74356	6.85353	7.01975	20.9307	9.09705	1.13891	0	0	12.1056	14.6241	1.17862	15.0758	11.1438	12.4497	10.1816	15.5378	12.5321	24.068	12.9796	23.4239	15.8819	2.44714	8.73174	0.0143598	0	9.20095	9.1414	8.50026	0.378569
49	leaves-shoots_tillering-stage_shoot-axis	173.426	256.709	500.167	40.3158	131.959	163.926	107.342	93.4675	70.0925	70.371	355.047	502.423	394.969	18.2984	18.9596	22.1022	5.90496	3.55705	2.93724	1.78146	10.863	18.2248	36.752	34.1637	15.2298	1.18418	0.182689	19.7376	29.4108	0.156311	59.2326	48.1984	60.1572	17.6511	24.2268	22.9008	50.1796	24.9592	42.3499	18.814	5.08197	13.5023	0	0	14.6424	15.8923	14.0479	0.448291
50	leaves-shoots_tillering-stage_shoot-apical-meristem	156.482	247.002	514.055	37.1909	118.046	151.999	105.483	91.1455	74.5149	76.627	329.952	510.114	365.417	17.3946	18.6188	21.2365	7.31936	3.36991	3.60719	1.9599	11.4368	18.4155	32.7508	34.7429	17.9472	1.29099	1.65275	20.4442	31.9946	0	61.1604	51.0058	60.6899	17.8483	24.4735	22.239	53.9788	27.1089	44.7447	20.15	6.86798	12.9495	0.0094077	0.0384088	15.9384	16.0682	14.1909	0.209301
51	leaves-shoots_tillering-stage_first-leaf-sheath	171.652	273.579	456.692	27.1214	86.8544	117.574	82.5663	132.059	111.558	123.926	142.311	186.021	150.866	12.9955	17.7365	19.6733	3.57951	14.7533	13.1195	8.5697	12.1169	14.6546	30.8834	21.5537	3.43953	0.29368	1.02e-08	19.2802	26.8128	0.790452	37.6385	31.1239	39.055	14.0514	22.5308	18.159	49.3757	33.9037	40.6233	21.2706	3.18524	13.054	0	0	19.3183	16.3054	16.2701	1.14642
52	leaves-shoots_tillering-stage_first-leaf-blade	148.43	233.569	429.167	17.1393	80.4456	84.1107	55.2331	218.399	190.955	194.456	84.7445	109.183	93.461	11.9133	15.676	14.2476	3.71967	14.1277	13.4974	10.1378	8.53862	10.5956	31.8828	17.4027	3.46446	0.897706	0.678889	22.3676	29.4039	0.930277	33.5739	28.5309	30.7835	14.8558	21.9155	20.9879	43.9242	29.8684	38.5998	28.9764	2.08187	19.3453	0	0.0175959	17.7739	14.9483	15.5618	1.27095
53	leaves-shoots_fifth-leaf-stage_fifth-leaf-sheath	129.517	205.355	347.753	39.0921	150.588	144.315	96.6118	41.1022	24.0522	35.6379	358.958	454.237	412.368	14.6216	16.1854	16.5305	5.68747	0.344332	0.348863	0.133465	8.0689	17.6169	33.7218	32.529	18.1043	1.70964	1.73572	19.6271	27.0412	0.951845	74.6546	60.5681	65.582	13.5683	18.0702	18.6865	28.3284	14.6957	31.017	19.9725	1.02831	15.8052	0.0467103	0	12.781	17.728	12.3601	0.475173
54	leaves-shoots_fifth-leaf-stage_fifth-leaf-blade	48.9955	83.026	138.677	12.9713	68.1876	41.2035	25.8939	95.9161	71.3838	81.9122	77.5222	94.9845	87.4356	5.34156	6.28234	6.19249	4.39682	1.35819	1.65639	1.02833	5.5956	5.23981	16.2759	11.5982	3.43942	0.197602	0.123583	7.774	10.41	0.238182	22.2471	16.248	16.5769	9.72616	12.8066	12.2176	15.5907	8.33342	16.4599	9.91458	0.127044	6.99082	0.0141572	0	4.99009	6.09481	5.28564	0.088879
55	leaves-shoots_three-leaf-stage_third-leaf-sheath	130.921	196.092	354.911	39.7117	155.928	157.28	107.283	41.8149	24.4111	33.8839	395.949	478.8	440.466	15.3716	14.118	16.2195	6.67075	0.313631	0.155873	0.103223	9.59336	18.948	36.3733	39.8732	18.7924	0.918117	2.49613	21.8696	29.5706	0.095352	83.5968	68.6753	76.7868	15.825	21.4584	19.9685	30.876	17.0841	34.7261	20.2741	2.48669	13.8089	0	0	15.1576	18.7368	13.6727	0.0441553
56	leaves-shoots_three-leaf-stage_third-leaf-blade	61.1782	92.7639	171.143	13.205	63.6654	48.2999	30.4848	123.774	105.435	104.495	95.977	121.831	98.4209	6.14089	7.09526	6.03866	2.59569	2.29553	2.94419	1.59823	5.8022	6.72016	19.3436	11.926	4.87799	0.46384	0.0555937	8.99343	11.7276	0.807931	21.3844	17.9682	20.1883	10.3048	14.3714	13.3732	21.3672	10.376	19.7928	13.1532	0.631407	7.56077	0	0	6.64693	7.2279	6.97862	0.21398
57	leaves-shoots_seedling-stage_stem-axis	92.2115	143.703	261.57	25.2426	132.498	99.8163	70.2477	48.7092	33.418	36.8711	181.967	230.46	188.842	9.33124	10.1401	12.1461	5.0466	1.03487	1.66229	0.549271	9.37609	11.8649	30.6296	25.733	10.8173	1.04378	1.0427	13.1978	19.7352	0.187743	50.5846	37.5004	43.5552	16.1986	22.0652	20.6143	26.7753	13.0523	30.6276	19.6892	1.13272	14.1067	0.0480481	0	11.9195	11.671	11.8183	0.99419
58	leaves-shoots_seedling-stage_shoot-apical-meristem	139.233	207.669	431.834	38.1449	129.819	146.978	87.9325	86.787	58.5779	56.4391	342.26	499.243	398.365	20.0226	22.1588	23.7797	6.06929	1.71489	1.54913	0.573932	12.0892	18.8376	32.0423	36.9646	14.2089	2.06754	1.34536	21.1501	34.1843	0.706403	61.3059	47.5392	60.3078	16.867	23.3238	21.5243	39.1183	19.6104	38.4339	18.7835	5.06758	13.1092	0	0.0281141	14.227	16.8818	14.7971	0.430436
59	leaves-shoots_seedling-stage_first-leaf-sheath	94.6533	144.132	252.876	21.4878	103.709	89.5693	56.4793	74.7353	53.1105	57.2731	145.693	181.965	157.881	11.0142	9.88228	14.3452	2.085	2.20775	2.39598	1.37876	10.5739	10.7071	29.0799	22.4864	10.5606	0.296937	0.812446	12.0807	18.1167	0.397883	42.3203	31.795	35.8422	15.0389	20.3122	20.6359	39.3777	18.5886	34.858	19.7351	3.58e-06	13.5134	0.0705413	0	12.0522	12.2803	13.0665	0.779423
60	leaves-shoots_seedling-stage_first-leaf-blade	52.6938	77.5066	134.021	11.9778	69.5992	37.818	22.0033	113.589	83.6239	87.6199	49.7427	56.9188	48.8646	5.98586	6.84796	7.59884	3.78039	3.843	7.33913	2.66397	5.79302	5.1369	18.3215	11.7411	1.83414	0.201006	0.130088	8.71123	12.9901	0	22.3909	16.2218	15.8667	11.9773	16.5738	15.5521	19.6553	12.0806	19.0777	13.5394	0.0194671	9.22979	0.0158987	0.0609703	8.32158	8.5623	9.82648	0.306608
61	leaves-shoots_seedling-stage_coleoptile	115.24	187.215	317.018	23.0511	110.933	98.6725	68.0461	57.715	41.3813	46.3791	172.128	216.719	187.843	11.8075	11.8642	13.9051	5.53783	2.74284	3.9288	1.03867	8.90465	10.5931	29.4116	22.128	12.3912	1.42893	0.747333	12.91	20.5799	0.475452	48.0446	39.7211	44.6844	14.8461	20.6574	21.6754	29.954	17.8114	29.8264	25.4396	0.220982	18.794	0	0.0368933	12.2184	14.708	13.5658	0.501893
62	root_30%-spike-stage_root	156.885	274.166	471.281	20.8458	86.6115	114.608	80.835	98.8591	75.1555	93.8753	171.079	221.92	184.238	19.8735	19.9834	22.9457	0.983183	6.2885	5.99886	4.7976	10.0901	15.4948	35.4174	27.1811	7.40747	0.70424	0	14.154	24.855	1.26799	37.5055	26.2203	35.2443	18.2674	24.9229	21.5268	70.8243	34.2687	50.9688	17.5424	0	12.1669	0.328449	0.145604	15.4518	16.071	13.1208	1.99839
63	root_flag-leaf-stage_root	204.407	345.893	640.08	24.8944	93.0755	169.127	120.647	116.374	97.4032	110.769	212.396	294.781	221.709	24.5702	25.1845	25.1427	8.45714	7.85198	7.25166	5.10315	12.4606	18.8166	36.5667	25.6305	8.58072	0.303947	0.226173	17.2235	30.3578	0.654354	39.118	29.2709	39.3372	18.1737	29.1938	21.9058	91.5574	38.1677	68.6153	18.0844	1.04899	11.0388	0.0962973	0.0776893	16.6601	15.0643	13.4721	1.80946
64	root_tillering-stage_root	189.771	275.714	545.018	31.4847	119.355	197.902	142.155	101.137	78.0825	86.5281	361.974	489.121	392.128	22.638	22.61	21.0254	6.97568	4.89487	4.36359	2.82591	9.74261	26.2154	50.3653	48.8897	17.1057	0.423304	0.0053276	22.6425	32.2898	1.38758	66.6939	58.3494	67.8754	24.2356	35.9941	31.8411	64.0414	25.811	49.5923	23.2681	2.22408	15.4452	0.249592	0.052659	17.8347	19.0631	16.3224	0.216277
65	root_tillering-stage_root-apical-meristem	182.637	255.008	506.783	36.9476	175.922	237.335	160.66	83.741	56.5678	60.3128	562.474	691.631	633.83	23.939	25.1899	21.1695	7.87447	3.6984	1.85573	1.00037	8.16199	34.9237	62.4425	72.3034	22.7889	1.21585	0.848514	23.366	31.171	0.397467	96.3984	82.9501	91.0342	26.1304	36.6374	36.4082	45.285	23.3352	45.5128	26.839	0	18.8637	0.034348	0.0661933	21.0516	20.9097	18.3033	0.304749
66	root_three-leaf-stage_root	181.738	305.37	527.219	26.4515	103.471	161.286	107.03	78.532	59.3578	71.4586	278.811	353.26	308.612	20.2442	21.5501	23.4621	6.33256	3.00376	3.16406	2.37467	9.75682	18.9746	34.3574	29.3688	12.8181	0.77145	1.14511	15.2029	23.5886	0.23802	57.3459	43.1205	54.9616	19.7797	30.8103	25.271	52.9099	24.7181	44.6141	19.3278	2.37444	12.7538	0	0	15.0646	15.431	12.9034	1.04005
67	root_three-leaf-stage_root-apical-meristem	197.313	299.28	566.787	33.9777	131.187	169.41	114.535	93.2272	71.6923	79.1944	326.717	484.201	377.312	20.8899	20.1236	22.8795	4.2183	7.95624	5.00861	3.00114	6.74578	23.4201	41.4477	41.7191	21.0323	1.11224	1.19582	12.9025	27.7097	0.303319	89.9929	68.1886	78.724	23.9613	33.3022	31.8783	60.5935	28.8884	54.3875	27.2905	7.40159	22.1347	0.223169	0.235296	17.1581	19.7241	16.0323	0.719415
68	root_three-leaf-stage_axillary-roots	198.587	288.486	541.891	30.7552	123.557	169.544	104.676	111.101	89.7118	98.7981	271.645	335.944	289.495	21.1794	21.4516	24.2989	6.85174	9.43359	9.63698	5.61598	10.5968	23.6905	41.6005	41.5571	12.8958	0.845505	0.596136	17.7901	30.1323	1.15917	69.3288	54.315	60.5042	20.0964	31.0073	25.1396	68.8879	32.2005	60.0913	31.4217	2.41295	22.4783	0.0910867	0.342196	20.4796	22.5348	17.7873	0.923051
69	root_seedling-stage_root	188.779	265.28	498.357	29.9265	134.841	158.229	101.166	113.944	85.3693	95.2806	280.489	369.303	309.712	23.0602	20.0974	23.9919	5.71521	9.92887	8.44361	5.66517	10.4463	22.8598	46.5302	44.3074	13.7141	0.617058	0.193145	19.1659	30.6652	0.75625	71.6548	56.4302	61.618	20.7629	32.9885	29.392	63.8128	33.4128	58.5463	35.5318	1.59842	24.3051	0.351872	1.14304	20.4916	19.5617	18.9446	1.1186
70	root_seedling-stage_radicle	179.425	249.568	494.483	31.3257	142.998	189.916	117.184	107.58	78.0839	78.7286	323.203	399.587	342.355	22.4018	20.8516	20.2351	5.97768	6.92104	7.57725	4.09175	10.1686	22.7201	48.0704	47.6664	12.0719	0.728793	1.31206	17.6981	28.8852	0.916698	69.2898	58.5476	65.445	20.4911	29.0738	29.1603	56.9106	28.5951	51.2295	27.5339	0.382153	19.961	0.81501	2.12839	21.5475	22.5269	20.6367	0.998983
[truncated: 4 more columns]
