# Supplementary material for: Genome-wide identification and expression analysis of ADP-ribosylation factors associated with biotic and abiotic stress in wheat (Triticum aestivum L.)
Source: PeerJ. 2021 Mar 2;9:e10963. doi: 10.7717/peerj.10963 (PMC7934654; doi:10.7717/peerj.10963)
Supplement: Supplemental Information 8 [file peerj-09-10963-s008.xlsx]

## Sheet: Sheet1
	Table S8. Relative expression of 15 wheat triads in four different tissues.
Group	Triad	Tissue (Azhurnaya Developmental time course)	relative expression A-subgenome homoeolog (0 if summed expression across triad was ≤0.5 TPM)	relative expression B-subgenome homoeolog (0 summed expression across triad was ≤0.5 TPM)	relative expression D-subgenome homoeolog (0 summed expression across triad was ≤0.5 TPM)	category
								Tissue	Balanced	A suppressed	B suppressed	D suppressed	A dominant	B dominant	D dominant	total
ARFA1	TaARFA1a	grain	15.4907	32.2346	52.2747	A-suppressed		grain	9	2	2	1	1	0	0	15
ARFA1	TaARFA1d	grain	0	61.7563	38.2437	A-suppressed			0.6	0.133333	0.133333	0.0666667	0.0666667	0	0	1
ARFA1	TaARFA1e	grain	32.3661	32.6358	34.9981	balanced		spike	10	1	1	2	1	0	0	15
ARFA1	TaARFA1f	grain	32.4122	38.3234	29.2643	balanced			0.666667	0.0666667	0.0666667	0.133333	0.0666667	0	0	1
ARFB1	TaARFB1a	grain	23.7015	30.7592	45.5393	balanced		shoot	11	1	1	1	1	0	0	15
ARFB1	TaARFB1c	grain	35.017	36.5264	28.4566	balanced			0.733333	0.0666667	0.0666667	0.0666667	0.0666667	0	0	1
ARFC1	TaARFC1	grain	27.005	38.8816	34.1134	balanced		root	11	1	1	1	1	0	0	15
ARF3	TaARF3	grain	76.8241	11.0022	12.1737	A-dominant			0.733333	0.0666667	0.0666667	0.0666667	0.0666667	0	0	1
ARFL1	TaARFL1a	grain	44.4501	53.1464	2.40354	D-suppressed		Average	0.683333	0.0833333	0.0833333	0.0833333	0.0666667	0	0	1
ARFL1	TaARFL1b	grain	37.5013	21.7942	40.7045	balanced
ARFL1	TaARFL1c	grain	21.3179	48.6296	30.0525	balanced
ARFL1	TaARFL1d	grain	38.8503	21.8927	39.257	balanced
ARFL1	TaARFL1e	grain	49.1276	3.95337	46.9191	B-suppressed
GB1	TaGB1a	grain	32.2476	33.7292	34.0232	balanced
TTN5	TaTTN5c	grain	55.465	11.4519	33.083	B-suppressed
ARFA1	TaARFA1a	spike	18.786	29.7128	51.5011	balanced
ARFA1	TaARFA1d	spike	0	61.5974	38.4026	A-suppressed
ARFA1	TaARFA1e	spike	37.8228	30.2215	31.9557	balanced
ARFA1	TaARFA1f	spike	33.1509	34.3757	32.4734	balanced
ARFB1	TaARFB1a	spike	26.0722	33.014	40.9138	balanced
ARFB1	TaARFB1c	spike	44.4324	39.8317	15.7359	D-suppressed
ARFC1	TaARFC1	spike	23.1733	47.757	29.0697	balanced
ARF3	TaARF3	spike	76.9444	17.8832	5.17244	A-dominant
ARFL1	TaARFL1a	spike	39.8227	58.5361	1.64128	D-suppressed
ARFL1	TaARFL1b	spike	35.3352	27.6722	36.9926	balanced
ARFL1	TaARFL1c	spike	25.2396	37.8658	36.8946	balanced
ARFL1	TaARFL1d	spike	38.636	22.4303	38.9337	balanced
ARFL1	TaARFL1e	spike	58.1682	3.59389	38.2379	B-suppressed
GB1	TaGB1a	spike	35.3645	32.6745	31.961	balanced
TTN5	TaTTN5c	spike	34.8562	20.6151	44.5287	balanced
ARFA1	TaARFA1a	shoot	19.1174	29.3038	51.5788	balanced
ARFA1	TaARFA1d	shoot	0	63.3171	36.6829	A-suppressed
ARFA1	TaARFA1e	shoot	35.5686	33.298	31.1335	balanced
ARFA1	TaARFA1f	shoot	33.83	35.29	30.88	balanced
ARFB1	TaARFB1a	shoot	28.697	32.7791	38.5239	balanced
ARFB1	TaARFB1c	shoot	37.7793	42.0964	20.1243	balanced
ARFC1	TaARFC1	shoot	18.7075	51.1819	30.1106	balanced
ARF3	TaARF3	shoot	82.4244	8.85943	8.71621	A-dominant
ARFL1	TaARFL1a	shoot	39.3408	59.4986	1.16053	D-suppressed
ARFL1	TaARFL1b	shoot	37.2415	28.3069	34.4516	balanced
ARFL1	TaARFL1c	shoot	27.3519	39.1557	33.4924	balanced
ARFL1	TaARFL1d	shoot	38.8242	23.7712	37.4046	balanced
ARFL1	TaARFL1e	shoot	58.0833	3.37076	38.546	B-suppressed
GB1	TaGB1a	shoot	35.1282	31.0084	33.8634	balanced
TTN5	TaTTN5c	shoot	35.8066	23.598	40.5954	balanced
ARFA1	TaARFA1a	root	19.0357	27.8018	53.1625	balanced
ARFA1	TaARFA1d	root	0	59.663	40.337	A-suppressed
ARFA1	TaARFA1e	root	38.0576	29.3822	32.5602	balanced
ARFA1	TaARFA1f	root	29.2327	38.489	32.2783	balanced
ARFB1	TaARFB1a	root	33.536	32.1137	34.3503	balanced
ARFB1	TaARFB1c	root	40.6841	35.2632	24.0526	balanced
ARFC1	TaARFC1	root	21.5294	39.1794	39.2912	balanced
ARF3	TaARF3	root	90.6831	5.12487	4.19203	A-dominant
ARFL1	TaARFL1a	root	36.4258	62.0177	1.5565	D-suppressed
ARFL1	TaARFL1b	root	36.9865	30.1221	32.8914	balanced
ARFL1	TaARFL1c	root	25.4047	38.4427	36.1527	balanced
ARFL1	TaARFL1d	root	44.3358	20.0711	35.5931	balanced
ARFL1	TaARFL1e	root	56.7407	3.37926	39.88	B-suppressed
GB1	TaGB1a	root	33.2001	36.415	30.385	balanced
TTN5	TaTTN5c	root	42.9554	26.5678	30.4768	balanced
