# Supplementary material for: Genome-wide identification and expression analysis of ADP-ribosylation factors associated with biotic and abiotic stress in wheat (Triticum aestivum L.)
Source: PeerJ. 2021 Mar 2;9:e10963. doi: 10.7717/peerj.10963 (PMC7934654; doi:10.7717/peerj.10963)
Supplement: Supplemental Information 9 [file peerj-09-10963-s009.xlsx]

## Sheet: Sheet1
Table S9.Expression of ARFA1 genes under different biotic and abiotic stresses.
	TaARFA1a-A	TaARFA1a-B	TaARFA1a-D	TaARFA1b-A	TaARFA1c-D	TaARFA1d-A	TaARFA1d-B	TaARFA1d-D	TaARFA1e-A	TaARFA1e-B	TaARFA1e-D	TaARFA1f-A	TaARFA1f-B	TaARFA1f-D
CK_leaf_7d_N9134	110.169	138.268	202.246	10.629	52.3004	0	45.2375	2.28052	164.975	132.455	160.899	64.5577	70.6039	69.8347
Powdery_mildew_pathogen_E09_24h_leaf_7d_N9134	134.163	215.823	319.796	10.3603	86.5252	0	126.263	6.651	99.0741	75.5534	104.951	154.972	147.435	148.536
Powdery_mildew_pathogen_E09_48h_leaf_7d_N9134	164.155	261.845	308.77	18.835	92.3116	0	83.9982	16.7291	148.32	130.54	152.33	95.8146	112.515	102.391
Powdery_mildew_pathogen_E09_72h_leaf_7d_N9134	206.046	256.241	293.53	17.7911	67.5627	0.0634167	73.783	12.3751	176.018	164.294	190.196	92.2757	103.087	84.3277
CK_leaf_7d_N9134	110.169	138.268	202.246	10.629	52.3004	0	45.2375	2.28052	164.975	132.455	160.899	64.5577	70.6039	69.8347
stripe_rust_pathogen_CYR31_24h_leaf_7d_N9134	148.049	122.84	170.589	7.08211	33.8626	0	28.1543	1.46139	163.025	130.391	104.887	80.0177	49.6177	91.1228
stripe_rust_pathogen_CYR31_48h_leaf_7d_N9134	76.2036	100.461	146.446	12.3014	43.552	0	33.6529	1.52543	157.532	120.296	113.205	81.2248	76.5505	64.624
stripe_rust_pathogen_CYR31_72h_leaf_7d_N9134	77.1183	65.5129	118.072	5.80334	43.0601	0	22.3141	1.71928	184.562	132.181	126.65	86.1374	58.7161	73.4049
transcript	TaARFA1a-A	TaARFA1a-B	TaARFA1a-D	TaARFA1b-A	TaARFA1c-D	TaARFA1d-A	TaARFA1d-B	TaARFA1d-D	TaARFA1e-A	TaARFA1e-B	TaARFA1e-D	TaARFA1f-A	TaARFA1f-B	TaARFA1f-D
1 hour of drought stress_leaf_7 days_TAM107	56.8539	87.5617	283.938	12.4535	52.8785	0	54.0799	0.407293	92.3418	88.9956	97.1828	75.8952	115.397	83.9621
6 hour of drought stress_leaf_7 days_TAM107	47.8332	68.0581	231.66	14.5061	44.5516	0	55.1288	0.503467	67.7819	64.7888	70.1581	55.236	101.754	60.606
1 hour of heat stress_leaf_7 days_TAM107	29.309	47.1698	180.149	4.58188	23.6876	0	27.82	0.092667	64.2638	68.7367	75.0709	29.6809	62.0327	35.1052
6 hour of heat stress_leaf_7 days_TAM107	41.5199	69.1585	254.446	9.64163	57.363	0	56.3206	1.0555	98.9656	75.6809	114.786	50.8976	80.0659	47.4554
1 hour of drought&heat combined stress_leaf_7 days_TAM107	18.0171	23.3299	129.693	3.36843	14.3544	0	19.8722	0.127843	48.1971	57.067	53.3137	21.3895	48.41	26.3028
6 hour of drought&heat combined stress_leaf_7 days_TAM107	21.6902	28.1046	154.755	6.63058	42.8493	0.0464196	50.3291	1.34628	62.6501	60.6835	80.0436	48.0864	92.4329	44.6557
