# Supplementary material for: Genome-wide identification and expression analysis of ADP-ribosylation factors associated with biotic and abiotic stress in wheat (Triticum aestivum L.)
Source: PeerJ. 2021 Mar 2;9:e10963. doi: 10.7717/peerj.10963 (PMC7934654; doi:10.7717/peerj.10963)
Supplement: Supplemental Information 10 [file peerj-09-10963-s010.xlsx]

## Sheet: Sheet1
Table S10. Detailed information of primers
Name	Primer
Actin-F	CAGCAATGTAGTTCGCAATC
Actin-R	TAGCATGAGGAAGCGTGTAT
GAPDH-F	CTGCATCATACGATGACATC
GAPDH-R	TGTCACCGACAAAGTCAGTG
TaARFA1a-A-F	GTGGAGGCACTACTTCCAGAACACC
TaARFA1a-A-R	CAATGTTGTTGGACAGCCAGTCAAG
TaARFA1a-B-F	GCACTACTTCCAGAACACCCAG
TaARFA1a-B-R	CAGCAGCACAGCATCACG
TaARFA1a-D-F	CGATGCGGCTGGTAAGA
TaARFA1a-D-R	TCCCAAACGGTGAAACTAA
TaARFA1b-A-F	ACGCAGGGTCTTATCTTT
TaARFA1b-A-R	CAGCAGCATTCATAGCAT
TaARFA1c-D-F	CTTTGTTGTGGACAGCAATGATAGG
TaARFA1c-D-R	CATGTGCTCTGGATGTACCAGTGAC
TaARFA1d-A-F	CATCCCAACCATCGGATTTAAC
TaARFA1d-B-R	GCTGTCAACAACAAAAATGAGC
TaARFA1d-B-F	GTCGACAGCAATGATAGGGAACGTG
TaARFA1d-B-R	CAGCAGCATTCATGGCATTAGGAAG
TaARFA1d-D-F	CTGCTGAAATCACCGACAA
TaARFA1d-D-R	GCCAGTCAAGACCCTCGT
TaARFA1e-A-F	CATGAATGCTGCTGAAATA
TaARFA1e-A-R	AGAGCCAGTCCAACCCT
TaARFA1e-B-F	CTCGGCGAGATCGTCAC
TaARFA1e-B-R	CACCAACATCCCAAACAG
TaARFA1e-D-F	GGCACTACTTCCAGAACACT
TaARFA1e-D-R	ACCCTTCATACAGACCCTC
TaARFA1f-A-F	CACTGTCTGGGATGTCGG
TaARFA1f-A-R	GCATTCATGGCATTTGGA
TaARFA1f-B-F	CAACATTGCCAACAAGTCCTAA
TaARFA1f-B-R	CAGTAGCTGTTGATCTCAGGAA
TaARFA1f-D-F	TCACTGTCTGGGATGTCGG
TaARFA1f-D-R	CAGCATTCATGGCATTTGG
