# Supplementary material for: Genome-wide identification and expression analysis of ADP-ribosylation factors associated with biotic and abiotic stress in wheat (Triticum aestivum L.)
Source: PeerJ. 2021 Mar 2;9:e10963. doi: 10.7717/peerj.10963 (PMC7934654; doi:10.7717/peerj.10963)
Supplement: Supplemental Information 11 [file peerj-09-10963-s011.xlsx]

## Sheet: Sheet1
Table S11.The relative expression of TaARFA1 members under ABA, salt and cold stress in root
gene	ABA			Salt			Cold
	0h	6h	12h	0h	6h	12h	0h	6h	12h
TaARFA1a-A	1	0.62±0.07	0.95±0.01	1	4.95±0.15	4.21±0.46	1	2.18±0.60	1.13±0.16
TaARFA1a-B	1	0.46±0.02	0.31±0.06	1	1.11±0.05	1.61±0.15	1	3.38±0.09	2.43±0.05
TaARFA1a-D	1	0.60±0.09	0.51±0.11	1	1.89±0.02	1.04±0.12	1	4.03±0.73	1.67±0.14
TaARFA1b-A	1	1.41±0.07	1.04±0.06	1	1.67±0.29	1.22±0.09	1	3.16±0.05	2.48±0.14
TaARFA1c-D	1	2.30±0.15	1.19±0.22	1	2.46±0.61	4.46±0.01	1	1.54±0.08	4.96±0.14
TaARFA1d-A	1	0.77±0.29	0.36±0.07	1	1.07±0.06	3.60±0.13	1	4.79±0.03	6.64±0.13
TaARFA1d-B	1	0.61±0.03	1.01±0.03	1	2.72±0.14	5.93±0.18	1	4.43±0.01	7.37±0.11
TaARFA1d-D	1	0.53±0.10	1.15±0.12	1	6.23±0.33	7.14±0.24	1	8.14±0.97	6.19±0.84
TaARFA1e-A	1	3.63±0.47	2.01±0.06	1	4.81±0.17	6.60±0.12	1	1.76±0.19	1.48±0.05
TaARFA1e-B	1	3.52±0.47	1.45±0.05	1	1.67±0.29	2.77±0.30	1	1.58±0.15	1.78±0.09
TaARFA1e-D	1	1.66±0.04	1.41±0.03	1	1.11±0.06	0.94±0.34	1	1.14±0.08	2.03±0.10
TaARFA1f-A	1	0.84±0.02	0.72±0.04	1	0.85±0.06	0.61±0.01	1	0.93±0.05	0.41±0.04
TaARFA1f-B	1	0.76±0.01	0.77±0.06	1	0.65±0.08	0.55±0.03	1	0.98±0.08	0.81±0.16
TaARFA1f-D	1	0.74±0.01	0.58±0.01	1	1.07±0.12	0.45±0.01	1	0.65±0.10	0.31±0.01
