# Supplementary material for: Genome-wide identification and expression analysis of ADP-ribosylation factors associated with biotic and abiotic stress in wheat (Triticum aestivum L.)
Source: PeerJ. 2021 Mar 2;9:e10963. doi: 10.7717/peerj.10963 (PMC7934654; doi:10.7717/peerj.10963)
Supplement: Supplemental Information 12 [file peerj-09-10963-s012.xlsx]

## Sheet: Sheet1
Table S12. Prediction results about cis-elements by PlantCARE analysis
Gene	Name	Coding sequence	Start position	Code length	Chain	Aligned species	Function
TaARF3-A	ABRE	ACGTG	759	5	+	Arabidopsis thaliana	cis-acting element involved in the abscisic acid responsiveness
TaARF3-A	ABRE	ACGTG	954	5	+	Arabidopsis thaliana	cis-acting element involved in the abscisic acid responsiveness
TaARF3-A	GC-motif	CCCCCG	644	6	-	Zea mays	enhancer-like element involved in anoxic specific inducibility
TaARF3-A	G-box	CACGAC	419	6	-	Zea mays	cis-acting regulatory element involved in light responsiveness
TaARF3-A	G-box	TACGTG	758	6	+	Arabidopsis thaliana	cis-acting regulatory element involved in light responsiveness
TaARF3-A	G-box	CACGTC	953	6	-	Zea mays	cis-acting regulatory element involved in light responsiveness
TaARF3-A	G-box	CACGAC	1431	6	+	Zea mays	cis-acting regulatory element involved in light responsiveness
TaARF3-A	ARE	AAACCA	97	6	-	Zea mays	cis-acting regulatory element essential for the anaerobic induction
TaARF3-A	ARE	AAACCA	460	6	-	Zea mays	cis-acting regulatory element essential for the anaerobic induction
TaARF3-A	ARE	AAACCA	857	6	+	Zea mays	cis-acting regulatory element essential for the anaerobic induction
TaARF3-A	TATA-box	TATAA	8	5	-	Arabidopsis thaliana	core promoter element around -30 of transcription start
TaARF3-A	TATA-box	TATA	9	4	+	Arabidopsis thaliana	core promoter element around -30 of transcription start
TaARF3-A	TATA-box	TACAAAA	791	7	+	Oryza sativa	core promoter element around -30 of transcription start
TaARF3-A	TATA-box	TATA	823	4	-	Arabidopsis thaliana	core promoter element around -30 of transcription start
TaARF3-A	TATA-box	TATATAA	869	7	-	Arabidopsis thaliana	core promoter element around -30 of transcription start
TaARF3-A	TATA-box	TATATA	870	6	-	Arabidopsis thaliana	core promoter element around -30 of transcription start
TaARF3-A	TATA-box	TATA	872	4	-	Arabidopsis thaliana	core promoter element around -30 of transcription start
TaARF3-A	TATA-box	TATAA	911	5	-	Arabidopsis thaliana	core promoter element around -30 of transcription start
TaARF3-A	TATA-box	TATA	912	4	-	Arabidopsis thaliana	core promoter element around -30 of transcription start
TaARF3-A	TATA-box	TATACA	920	6	-	Helianthus annuus	core promoter element around -30 of transcription start
TaARF3-A	TATA-box	TATA	922	4	-	Arabidopsis thaliana	core promoter element around -30 of transcription start
TaARF3-A	TATA-box	TATAAATA	1230	8	-	Daucus carota	core promoter element around -30 of transcription start
TaARF3-A	TATA-box	TATAAAT	1231	7	-	Brassica juncea	core promoter element around -30 of transcription start
TaARF3-A	TATA-box	TATAAA	1232	6	-	Helianthus annuus	core promoter element around -30 of transcription start
TaARF3-A	TATA-box	TATAA	1233	5	-	Arabidopsis thaliana	core promoter element around -30 of transcription start
TaARF3-A	TATA-box	TATA	1234	4	-	Arabidopsis thaliana	core promoter element around -30 of transcription start
TaARF3-A	CGTCA-motif	CGTCA	259	5	-	Hordeum vulgare	cis-acting regulatory element involved in the MeJA-responsiveness
TaARF3-A	CGTCA-motif	CGTCA	952	5	-	Hordeum vulgare	cis-acting regulatory element involved in the MeJA-responsiveness
TaARF3-A	CGTCA-motif	CGTCA	1153	5	-	Hordeum vulgare	cis-acting regulatory element involved in the MeJA-responsiveness
TaARF3-A	CGTCA-motif	CGTCA	1193	5	+	Hordeum vulgare	cis-acting regulatory element involved in the MeJA-responsiveness
TaARF3-A	CGTCA-motif	CGTCA	1497	5	+	Hordeum vulgare	cis-acting regulatory element involved in the MeJA-responsiveness
TaARF3-A	LTR	CCGAAA	403	6	+	Hordeum vulgare	cis-acting element involved in low-temperature responsiveness
TaARF3-A	CCAAT-box	CAACGG	616	6	+	Hordeum vulgare	MYBHv1 binding site
TaARF3-A	CAAT-box	CAAAT	30	5	-	Pisum sativum	common cis-acting element in promoter and enhancer regions
TaARF3-A	CAAT-box	CAAT	87	4	-	Nicotiana glutinosa
TaARF3-A	CAAT-box	CAAT	229	4	+	Nicotiana glutinosa
TaARF3-A	CAAT-box	CAAT	280	4	-	Nicotiana glutinosa
TaARF3-A	CAAT-box	CAAT	343	4	-	Nicotiana glutinosa
TaARF3-A	CAAT-box	TGCCAAC	363	7	-	Petunia hybrida	common cis-acting element in promoter and enhancer regions
TaARF3-A	CAAT-box	CCAAT	566	5	+	Arabidopsis thaliana	common cis-acting element in promoter and enhancer regions
TaARF3-A	CAAT-box	CAAT	567	4	+	Nicotiana glutinosa
TaARF3-A	CAAT-box	CAAT	638	4	+	Nicotiana glutinosa
TaARF3-A	CAAT-box	CAAT	771	4	-	Nicotiana glutinosa
TaARF3-A	CAAT-box	CAAT	776	4	-	Nicotiana glutinosa
TaARF3-A	CAAT-box	CCAAT	1065	5	+	Arabidopsis thaliana	common cis-acting element in promoter and enhancer regions
TaARF3-A	CAAT-box	CAAT	1066	4	+	Nicotiana glutinosa
TaARF3-A	CAAT-box	CAAT	1150	4	+	Nicotiana glutinosa
TaARF3-A	A-box	CCGTCC	1046	6	+	Petroselinum crispum	cis-acting regulatory element
TaARF3-A	TGACG-motif	TGACG	259	5	+	Hordeum vulgare	cis-acting regulatory element involved in the MeJA-responsiveness
TaARF3-A	TGACG-motif	TGACG	952	5	+	Hordeum vulgare	cis-acting regulatory element involved in the MeJA-responsiveness
TaARF3-A	TGACG-motif	TGACG	1153	5	+	Hordeum vulgare	cis-acting regulatory element involved in the MeJA-responsiveness
TaARF3-A	TGACG-motif	TGACG	1193	5	-	Hordeum vulgare	cis-acting regulatory element involved in the MeJA-responsiveness
TaARF3-A	TGACG-motif	TGACG	1497	5	-	Hordeum vulgare	cis-acting regulatory element involved in the MeJA-responsiveness
TaARF3-B	CAT-box	GCCACT	40	6	+	Arabidopsis thaliana	cis-acting regulatory element related to meristem expression
TaARF3-B	TATC-box	TATCCCA	159	7	+	Oryza sativa	cis-acting element involved in gibberellin-responsiveness
TaARF3-B	TATC-box	TATCCCA	1053	7	+	Oryza sativa	cis-acting element involved in gibberellin-responsiveness
TaARF3-B	CAAT-box	CAAAT	17	5	-	Pisum sativum	common cis-acting element in promoter and enhancer regions
TaARF3-B	CAAT-box	CAAAT	36	5	-	Pisum sativum	common cis-acting element in promoter and enhancer regions
TaARF3-B	CAAT-box	CAAT	61	4	-	Nicotiana glutinosa
TaARF3-B	CAAT-box	CAAAT	101	5	-	Pisum sativum	common cis-acting element in promoter and enhancer regions
TaARF3-B	CAAT-box	CCAAT	142	5	+	Arabidopsis thaliana	common cis-acting element in promoter and enhancer regions
TaARF3-B	CAAT-box	CAAT	143	4	+	Nicotiana glutinosa
TaARF3-B	CAAT-box	CAAT	153	4	+	Nicotiana glutinosa
TaARF3-B	CAAT-box	CAAT	205	4	-	Nicotiana glutinosa
TaARF3-B	CAAT-box	CAAT	295	4	-	Nicotiana glutinosa
TaARF3-B	CAAT-box	CAAT	337	4	-	Nicotiana glutinosa
TaARF3-B	CAAT-box	CAAAT	394	5	+	Pisum sativum	common cis-acting element in promoter and enhancer regions
TaARF3-B	CAAT-box	CAAT	437	4	+	Nicotiana glutinosa
TaARF3-B	CAAT-box	CAAT	488	4	-	Nicotiana glutinosa
TaARF3-B	CAAT-box	CAAAT	512	5	+	Pisum sativum	common cis-acting element in promoter and enhancer regions
TaARF3-B	CAAT-box	CAAT	551	4	-	Nicotiana glutinosa
TaARF3-B	CAAT-box	TGCCAAC	571	7	-	Petunia hybrida	common cis-acting element in promoter and enhancer regions
TaARF3-B	CAAT-box	CCAAT	774	5	+	Arabidopsis thaliana	common cis-acting element in promoter and enhancer regions
TaARF3-B	CAAT-box	CAAT	775	4	+	Nicotiana glutinosa
TaARF3-B	CAAT-box	CCAAT	845	5	+	Arabidopsis thaliana	common cis-acting element in promoter and enhancer regions
TaARF3-B	CAAT-box	CAAT	846	4	+	Nicotiana glutinosa
TaARF3-B	CAAT-box	CAAT	934	4	+	Nicotiana glutinosa
TaARF3-B	CAAT-box	CAAT	979	4	-	Nicotiana glutinosa
TaARF3-B	CAAT-box	CAAT	984	4	-	Nicotiana glutinosa
TaARF3-B	CAAT-box	CAAT	1362	4	+	Nicotiana glutinosa
TaARF3-B	CAAT-box	CAAT	1434	4	+	Nicotiana glutinosa
TaARF3-B	CAAT-box	CAAAT	1445	5	-	Pisum sativum	common cis-acting element in promoter and enhancer regions
TaARF3-B	CAAT-box	CAAT	1458	4	-	Nicotiana glutinosa
TaARF3-B	CAAT-box	CCAAT	1476	5	-	Arabidopsis thaliana	common cis-acting element in promoter and enhancer regions
TaARF3-B	CCAAT-box	CAACGG	824	6	+	Hordeum vulgare	MYBHv1 binding site
TaARF3-B	CGTCA-motif	CGTCA	467	5	-	Hordeum vulgare	cis-acting regulatory element involved in the MeJA-responsiveness
TaARF3-B	CGTCA-motif	CGTCA	719	5	+	Hordeum vulgare	cis-acting regulatory element involved in the MeJA-responsiveness
TaARF3-B	CGTCA-motif	CGTCA	724	5	-	Hordeum vulgare	cis-acting regulatory element involved in the MeJA-responsiveness
TaARF3-B	CGTCA-motif	CGTCA	1309	5	+	Hordeum vulgare	cis-acting regulatory element involved in the MeJA-responsiveness
TaARF3-B	CGTCA-motif	CGTCA	1365	5	-	Hordeum vulgare	cis-acting regulatory element involved in the MeJA-responsiveness
TaARF3-B	TGACG-motif	TGACG	467	5	+	Hordeum vulgare	cis-acting regulatory element involved in the MeJA-responsiveness
TaARF3-B	TGACG-motif	TGACG	719	5	-	Hordeum vulgare	cis-acting regulatory element involved in the MeJA-responsiveness
TaARF3-B	TGACG-motif	TGACG	724	5	+	Hordeum vulgare	cis-acting regulatory element involved in the MeJA-responsiveness
TaARF3-B	TGACG-motif	TGACG	1309	5	-	Hordeum vulgare	cis-acting regulatory element involved in the MeJA-responsiveness
TaARF3-B	TGACG-motif	TGACG	1365	5	+	Hordeum vulgare	cis-acting regulatory element involved in the MeJA-responsiveness
TaARF3-B	G-box	CACGTC	529	6	+	Zea mays	cis-acting regulatory element involved in light responsiveness
TaARF3-B	G-box	CACGAC	532	6	-	Zea mays	cis-acting regulatory element involved in light responsiveness
TaARF3-B	ARE	AAACCA	305	6	-	Zea mays	cis-acting regulatory element essential for the anaerobic induction
TaARF3-B	ARE	AAACCA	668	6	-	Zea mays	cis-acting regulatory element essential for the anaerobic induction
TaARF3-B	ARE	AAACCA	1066	6	+	Zea mays	cis-acting regulatory element essential for the anaerobic induction
TaARF3-B	ABRE	ACGTG	529	5	-	Arabidopsis thaliana	cis-acting element involved in the abscisic acid responsiveness
TaARF3-B	TATA-box	ATATAT	132	6	+	Brassica napus	core promoter element around -30 of transcription start
TaARF3-B	TATA-box	TATA	133	4	+	Arabidopsis thaliana	core promoter element around -30 of transcription start
TaARF3-B	TATA-box	TATAA	217	5	-	Arabidopsis thaliana	core promoter element around -30 of transcription start
TaARF3-B	TATA-box	TATA	218	4	+	Arabidopsis thaliana	core promoter element around -30 of transcription start
TaARF3-B	TATA-box	TATA	626	4	+	Arabidopsis thaliana	core promoter element around -30 of transcription start
TaARF3-B	TATA-box	taTATAAAtc	1075	9	-	Arabidopsis thaliana	core promoter element around -30 of transcription start
TaARF3-B	TATA-box	TATATAA	1078	7	-	Arabidopsis thaliana	core promoter element around -30 of transcription start
TaARF3-B	TATA-box	TATATA	1079	6	-	Arabidopsis thaliana	core promoter element around -30 of transcription start
TaARF3-B	TATA-box	TATA	1081	4	-	Arabidopsis thaliana	core promoter element around -30 of transcription start
TaARF3-B	TATA-box	TATAA	1120	5	-	Arabidopsis thaliana	core promoter element around -30 of transcription start
TaARF3-B	TATA-box	TATA	1121	4	-	Arabidopsis thaliana	core promoter element around -30 of transcription start
TaARF3-D	CGTCA-motif	CGTCA	217	5	-	Hordeum vulgare	cis-acting regulatory element involved in the MeJA-responsiveness
TaARF3-D	CGTCA-motif	CGTCA	1106	5	-	Hordeum vulgare	cis-acting regulatory element involved in the MeJA-responsiveness
TaARF3-D	LTR	CCGAAA	360	6	+	Hordeum vulgare	cis-acting element involved in low-temperature responsiveness
TaARF3-D	CAAT-box	CAAT	187	4	+	Nicotiana glutinosa
TaARF3-D	CAAT-box	CCAAT	205	5	-	Arabidopsis thaliana	common cis-acting element in promoter and enhancer regions
TaARF3-D	CAAT-box	CAAT	238	4	-	Nicotiana glutinosa
TaARF3-D	CAAT-box	CAAT	301	4	-	Nicotiana glutinosa
TaARF3-D	CAAT-box	TGCCAAC	320	7	-	Petunia hybrida	common cis-acting element in promoter and enhancer regions
TaARF3-D	CAAT-box	CCAAT	466	5	-	Arabidopsis thaliana	common cis-acting element in promoter and enhancer regions
TaARF3-D	CAAT-box	CCAAT	516	5	+	Arabidopsis thaliana	common cis-acting element in promoter and enhancer regions
TaARF3-D	CAAT-box	CAAT	517	4	+	Nicotiana glutinosa
TaARF3-D	CAAT-box	CAAT	566	4	+	Nicotiana glutinosa
TaARF3-D	CAAT-box	CCAAT	587	5	+	Arabidopsis thaliana	common cis-acting element in promoter and enhancer regions
TaARF3-D	CAAT-box	CAAT	588	4	+	Nicotiana glutinosa
TaARF3-D	CAAT-box	CAAT	721	4	-	Nicotiana glutinosa
TaARF3-D	CAAT-box	CAAT	726	4	-	Nicotiana glutinosa
TaARF3-D	CAAT-box	CCAAT	859	5	-	Arabidopsis thaliana	common cis-acting element in promoter and enhancer regions
TaARF3-D	CAAT-box	CAAAT	1226	5	-	Pisum sativum	common cis-acting element in promoter and enhancer regions
TaARF3-D	CAAT-box	CAAAT	1315	5	+	Pisum sativum	common cis-acting element in promoter and enhancer regions
TaARF3-D	AuxRR-core	GGTCCAT	802	7	-	Nicotiana tabacum	cis-acting regulatory element involved in auxin responsiveness
TaARF3-D	TGACG-motif	TGACG	217	5	+	Hordeum vulgare	cis-acting regulatory element involved in the MeJA-responsiveness
TaARF3-D	TGACG-motif	TGACG	1106	5	+	Hordeum vulgare	cis-acting regulatory element involved in the MeJA-responsiveness
TaARF3-D	MBS	CAACTG	488	6	-	Arabidopsis thaliana	MYB binding site involved in drought-inducibility
TaARF3-D	Sp1	GGGCGG	2	6	+	Oryza sativa	light responsive element
TaARF3-D	O2-site	GATGACATGG	731	9	+	Zea mays	cis-acting regulatory element involved in zein metabolism regulation
TaARF3-D	O2-site	GATGA(C/T)(A/G)TG(A/G)	959	8.5	+	Zea mays	cis-acting regulatory element involved in zein metabolism regulation
TaARF3-D	ABRE	AACCCGG	150	7	-	Arabidopsis thaliana	cis-acting element involved in the abscisic acid responsiveness
TaARF3-D	ABRE	ACGTG	316	5	+	Arabidopsis thaliana	cis-acting element involved in the abscisic acid responsiveness
TaARF3-D	ABRE	TACGGTC	769	7	-	Arabidopsis thaliana	cis-acting element involved in the abscisic acid responsiveness
TaARF3-D	G-box	CACGAC	282	6	-	Zea mays	cis-acting regulatory element involved in light responsiveness
TaARF3-D	G-box	CACGTC	315	6	-	Zea mays	cis-acting regulatory element involved in light responsiveness
TaARF3-D	G-box	CACGAC	1431	6	+	Zea mays	cis-acting regulatory element involved in light responsiveness
TaARF3-D	ARE	AAACCA	417	6	-	Zea mays	cis-acting regulatory element essential for the anaerobic induction
TaARF3-D	ARE	AAACCA	810	6	+	Zea mays	cis-acting regulatory element essential for the anaerobic induction
TaARF3-D	TATA-box	TATATAA	822	7	-	Arabidopsis thaliana	core promoter element around -30 of transcription start
TaARF3-D	TATA-box	TATATA	823	6	-	Arabidopsis thaliana	core promoter element around -30 of transcription start
TaARF3-D	TATA-box	ATATAA	824	6	+	Brassica oleracea	core promoter element around -30 of transcription start
TaARF3-D	TATA-box	TATA	825	4	-	Arabidopsis thaliana	core promoter element around -30 of transcription start
TaARF3-D	TATA-box	TATAAATA	1185	8	-	Daucus carota	core promoter element around -30 of transcription start
TaARF3-D	TATA-box	TATAAAT	1186	7	-	Brassica juncea	core promoter element around -30 of transcription start
TaARF3-D	TATA-box	TATAAA	1187	6	-	Helianthus annuus	core promoter element around -30 of transcription start
TaARF3-D	TATA-box	TATAA	1188	5	-	Arabidopsis thaliana	core promoter element around -30 of transcription start
TaARF3-D	TATA-box	TATA	1189	4	-	Arabidopsis thaliana	core promoter element around -30 of transcription start
TaARFA1a-A	MBS	CAACTG	837	6	-	Arabidopsis thaliana	MYB binding site involved in drought-inducibility
TaARFA1a-A	G-Box	CACGTT	845	6	+	Pisum sativum	cis-acting regulatory element involved in light responsiveness
TaARFA1a-A	A-box	CCGTCC	314	6	+	Petroselinum crispum	cis-acting regulatory element
TaARFA1a-A	GARE-motif	TCTGTTG	1307	7	-	Brassica oleracea	gibberellin-responsive element
TaARFA1a-A	AuxRR-core	GGTCCAT	1440	7	-	Nicotiana tabacum	cis-acting regulatory element involved in auxin responsiveness
TaARFA1a-A	I-box	AAGATAAGGCT	1084	10	-	Gossypium hirsutum	part of a light responsive element
TaARFA1a-A	I-box	gGATAAGGTG	1167	9	-	Zea mays	part of a light responsive element
TaARFA1a-A	LTR	CCGAAA	852	6	-	Hordeum vulgare	cis-acting element involved in low-temperature responsiveness
TaARFA1a-A	CAAT-box	CCAAT	262	5	-	Arabidopsis thaliana	common cis-acting element in promoter and enhancer regions
TaARFA1a-A	CAAT-box	CAAAT	343	5	-	Pisum sativum	common cis-acting element in promoter and enhancer regions
TaARFA1a-A	CAAT-box	CCAAT	411	5	-	Arabidopsis thaliana	common cis-acting element in promoter and enhancer regions
TaARFA1a-A	CAAT-box	CAAT	590	4	-	Nicotiana glutinosa
TaARFA1a-A	CAAT-box	CAAT	619	4	+	Nicotiana glutinosa
TaARFA1a-A	CAAT-box	CAAT	621	4	-	Nicotiana glutinosa
TaARFA1a-A	CAAT-box	CCAAT	725	5	+	Arabidopsis thaliana	common cis-acting element in promoter and enhancer regions
TaARFA1a-A	CAAT-box	CAAT	726	4	+	Nicotiana glutinosa
TaARFA1a-A	CAAT-box	CAAAT	792	5	-	Pisum sativum	common cis-acting element in promoter and enhancer regions
TaARFA1a-A	CAAT-box	CAAT	901	4	+	Nicotiana glutinosa
TaARFA1a-A	CAAT-box	CAAT	941	4	+	Nicotiana glutinosa
TaARFA1a-A	CAAT-box	CAAT	949	4	+	Nicotiana glutinosa
TaARFA1a-A	CAAT-box	CAAT	1036	4	+	Nicotiana glutinosa
TaARFA1a-A	CAAT-box	CAAT	1056	4	+	Nicotiana glutinosa
TaARFA1a-A	CAAT-box	CCAAT	1254	5	+	Arabidopsis thaliana	common cis-acting element in promoter and enhancer regions
TaARFA1a-A	CAAT-box	CAAT	1255	4	+	Nicotiana glutinosa
TaARFA1a-A	CAAT-box	CAAT	1474	4	+	Nicotiana glutinosa
TaARFA1a-A	CAAT-box	CCAAT	1476	5	-	Arabidopsis thaliana	common cis-acting element in promoter and enhancer regions
TaARFA1a-A	CCAAT-box	CAACGG	613	6	+	Hordeum vulgare	MYBHv1 binding site
TaARFA1a-A	CAT-box	GCCACT	969	6	-	Arabidopsis thaliana	cis-acting regulatory element related to meristem expression
TaARFA1a-A	TATA-box	TATA	473	4	+	Arabidopsis thaliana	core promoter element around -30 of transcription start
TaARFA1a-A	TATA-box	TATA	486	4	+	Arabidopsis thaliana	core promoter element around -30 of transcription start
TaARFA1a-A	TATA-box	TATATA	1124	6	-	Arabidopsis thaliana	core promoter element around -30 of transcription start
TaARFA1a-A	TATA-box	TATA	1126	4	-	Arabidopsis thaliana	core promoter element around -30 of transcription start
TaARFA1a-A	TATA-box	TATAAA	1131	6	-	Helianthus annuus	core promoter element around -30 of transcription start
TaARFA1a-A	TATA-box	TATAA	1132	5	-	Arabidopsis thaliana	core promoter element around -30 of transcription start
TaARFA1a-A	TATA-box	TATA	1133	4	-	Arabidopsis thaliana	core promoter element around -30 of transcription start
TaARFA1a-A	TATA-box	TATATA	1213	6	-	Arabidopsis thaliana	core promoter element around -30 of transcription start
TaARFA1a-A	TATA-box	ATATAT	1214	6	-	Brassica napus	core promoter element around -30 of transcription start
TaARFA1a-A	TATA-box	TATA	1215	4	-	Arabidopsis thaliana	core promoter element around -30 of transcription start
TaARFA1a-A	TATA-box	TATA	1343	4	-	Arabidopsis thaliana	core promoter element around -30 of transcription start
TaARFA1a-A	ABRE	ACGTG	489	5	+	Arabidopsis thaliana	cis-acting element involved in the abscisic acid responsiveness
TaARFA1a-A	ABRE	ACGTG	845	5	-	Arabidopsis thaliana	cis-acting element involved in the abscisic acid responsiveness
TaARFA1a-A	G-box	TACGTG	488	6	+	Arabidopsis thaliana	cis-acting regulatory element involved in light responsiveness
TaARFA1a-A	G-box	GCCACGTGGA	1379	9	-	Arabidopsis thaliana	cis-acting regulatory element involved in light responsiveness
TaARFA1a-A	ARE	AAACCA	758	6	+	Zea mays	cis-acting regulatory element essential for the anaerobic induction
TaARFA1a-A	ARE	AAACCA	1251	6	+	Zea mays	cis-acting regulatory element essential for the anaerobic induction
TaARFA1a-A	ARE	AAACCA	1423	6	+	Zea mays	cis-acting regulatory element essential for the anaerobic induction
TaARFA1a-A	O2-site	GATGATGTGG	1105	9	-	Zea mays	cis-acting regulatory element involved in zein metabolism regulation
TaARFA1a-B	G-box	CACGAC	621	6	+	Zea mays	cis-acting regulatory element involved in light responsiveness
TaARFA1a-B	G-box	CACGTC	766	6	+	Zea mays	cis-acting regulatory element involved in light responsiveness
TaARFA1a-B	ARE	AAACCA	859	6	+	Zea mays	cis-acting regulatory element essential for the anaerobic induction
TaARFA1a-B	ARE	AAACCA	1104	6	+	Zea mays	cis-acting regulatory element essential for the anaerobic induction
TaARFA1a-B	ARE	AAACCA	1352	6	+	Zea mays	cis-acting regulatory element essential for the anaerobic induction
TaARFA1a-B	ABRE	ACGTG	766	5	-	Arabidopsis thaliana	cis-acting element involved in the abscisic acid responsiveness
TaARFA1a-B	ABRE	ACGTG	946	5	-	Arabidopsis thaliana	cis-acting element involved in the abscisic acid responsiveness
TaARFA1a-B	TATA-box	TATATA	1225	6	-	Arabidopsis thaliana	core promoter element around -30 of transcription start
TaARFA1a-B	TATA-box	TATA	1227	4	-	Arabidopsis thaliana	core promoter element around -30 of transcription start
TaARFA1a-B	TATA-box	TATAAA	1232	6	-	Helianthus annuus	core promoter element around -30 of transcription start
TaARFA1a-B	TATA-box	TATAA	1233	5	-	Arabidopsis thaliana	core promoter element around -30 of transcription start
TaARFA1a-B	TATA-box	TATA	1234	4	-	Arabidopsis thaliana	core promoter element around -30 of transcription start
TaARFA1a-B	TATA-box	TATATA	1314	6	-	Arabidopsis thaliana	core promoter element around -30 of transcription start
TaARFA1a-B	TATA-box	ATATAT	1315	6	-	Brassica napus	core promoter element around -30 of transcription start
TaARFA1a-B	TATA-box	TATA	1316	4	-	Arabidopsis thaliana	core promoter element around -30 of transcription start
TaARFA1a-B	TATA-box	TATA	1444	4	-	Arabidopsis thaliana	core promoter element around -30 of transcription start
TaARFA1a-B	TATA-box	TATA	1462	4	-	Arabidopsis thaliana	core promoter element around -30 of transcription start
TaARFA1a-B	Sp1	GGGCGG	514	6	-	Oryza sativa	light responsive element
TaARFA1a-B	O2-site	GATGATGTGG	1206	9	-	Zea mays	cis-acting regulatory element involved in zein metabolism regulation
TaARFA1a-B	G-Box	CACGTT	946	6	+	Pisum sativum	cis-acting regulatory element involved in light responsiveness
TaARFA1a-B	AuxRR-core	GGTCCAT	1476	7	-	Nicotiana tabacum	cis-acting regulatory element involved in auxin responsiveness
TaARFA1a-B	MBS	CAACTG	938	6	-	Arabidopsis thaliana	MYB binding site involved in drought-inducibility
TaARFA1a-B	TGACG-motif	TGACG	5	5	+	Hordeum vulgare	cis-acting regulatory element involved in the MeJA-responsiveness
TaARFA1a-B	TGACG-motif	TGACG	583	5	+	Hordeum vulgare	cis-acting regulatory element involved in the MeJA-responsiveness
TaARFA1a-B	CAT-box	GCCACT	1070	6	-	Arabidopsis thaliana	cis-acting regulatory element related to meristem expression
TaARFA1a-B	CAAT-box	CAAAT	19	5	+	Pisum sativum	common cis-acting element in promoter and enhancer regions
TaARFA1a-B	CAAT-box	CAAT	34	4	+	Nicotiana glutinosa
TaARFA1a-B	CAAT-box	CAAT	47	4	+	Nicotiana glutinosa
TaARFA1a-B	CAAT-box	CAAT	49	4	-	Nicotiana glutinosa
TaARFA1a-B	CAAT-box	CAAAT	61	5	+	Pisum sativum	common cis-acting element in promoter and enhancer regions
TaARFA1a-B	CAAT-box	CAAAT	148	5	+	Pisum sativum	common cis-acting element in promoter and enhancer regions
TaARFA1a-B	CAAT-box	CAAAT	151	5	-	Pisum sativum	common cis-acting element in promoter and enhancer regions
TaARFA1a-B	CAAT-box	CCAAT	599	5	-	Arabidopsis thaliana	common cis-acting element in promoter and enhancer regions
TaARFA1a-B	CAAT-box	CAAT	667	4	-	Nicotiana glutinosa
TaARFA1a-B	CAAT-box	CAAT	691	4	-	Nicotiana glutinosa
TaARFA1a-B	CAAT-box	CAAAT	832	5	-	Pisum sativum	common cis-acting element in promoter and enhancer regions
TaARFA1a-B	CAAT-box	CAAAT	893	5	-	Pisum sativum	common cis-acting element in promoter and enhancer regions
TaARFA1a-B	CAAT-box	CAAT	915	4	+	Nicotiana glutinosa
TaARFA1a-B	CAAT-box	CAAT	1002	4	+	Nicotiana glutinosa
TaARFA1a-B	CAAT-box	CAAT	1042	4	+	Nicotiana glutinosa
TaARFA1a-B	CAAT-box	CAAT	1050	4	+	Nicotiana glutinosa
TaARFA1a-B	CAAT-box	CAAT	1137	4	+	Nicotiana glutinosa
TaARFA1a-B	CAAT-box	CAAT	1157	4	+	Nicotiana glutinosa
TaARFA1a-B	CAAT-box	CCAAT	1355	5	+	Arabidopsis thaliana	common cis-acting element in promoter and enhancer regions
TaARFA1a-B	CAAT-box	CAAT	1356	4	+	Nicotiana glutinosa
TaARFA1a-B	CAAT-box	CAAT	1408	4	+	Nicotiana glutinosa
TaARFA1a-B	I-box	AAGATAAGGCT	1185	10	-	Gossypium hirsutum	part of a light responsive element
TaARFA1a-B	I-box	gGATAAGGTG	1268	9	-	Zea mays	part of a light responsive element
TaARFA1a-B	LTR	CCGAAA	953	6	-	Hordeum vulgare	cis-acting element involved in low-temperature responsiveness
TaARFA1a-B	CGTCA-motif	CGTCA	5	5	-	Hordeum vulgare	cis-acting regulatory element involved in the MeJA-responsiveness
TaARFA1a-B	CGTCA-motif	CGTCA	583	5	-	Hordeum vulgare	cis-acting regulatory element involved in the MeJA-responsiveness
TaARFA1a-D	TATA-box	ATATAT	379	6	+	Brassica napus	core promoter element around -30 of transcription start
TaARFA1a-D	TATA-box	TATA	380	4	+	Arabidopsis thaliana	core promoter element around -30 of transcription start
TaARFA1a-D	TATA-box	TATA	682	4	+	Arabidopsis thaliana	core promoter element around -30 of transcription start
TaARFA1a-D	TATA-box	TATA	1171	4	-	Arabidopsis thaliana	core promoter element around -30 of transcription start
TaARFA1a-D	TATA-box	TATA	1184	4	-	Arabidopsis thaliana	core promoter element around -30 of transcription start
TaARFA1a-D	ARE	AAACCA	898	6	-	Zea mays	cis-acting regulatory element essential for the anaerobic induction
TaARFA1a-D	ARE	AAACCA	1420	6	+	Zea mays	cis-acting regulatory element essential for the anaerobic induction
TaARFA1a-D	G-box	GCCACGTGGA	415	9	-	Arabidopsis thaliana	cis-acting regulatory element involved in light responsiveness
TaARFA1a-D	G-box	CACGTC	417	6	-	Zea mays	cis-acting regulatory element involved in light responsiveness
TaARFA1a-D	ABRE	ACGTG	418	5	+	Arabidopsis thaliana	cis-acting element involved in the abscisic acid responsiveness
TaARFA1a-D	ABRE	AACCCGG	496	7	+	Arabidopsis thaliana	cis-acting element involved in the abscisic acid responsiveness
TaARFA1a-D	GC-motif	CCCCCG	439	6	+	Zea mays	enhancer-like element involved in anoxic specific inducibility
TaARFA1a-D	ACE	GACACGTATG	1094	9	+	Petroselinum crispum	cis-acting element involved in light responsiveness
TaARFA1a-D	Sp1	GGGCGG	310	6	+	Oryza sativa	light responsive element
TaARFA1a-D	Sp1	GGGCGG	458	6	-	Oryza sativa	light responsive element
TaARFA1a-D	Sp1	GGGCGG	559	6	-	Oryza sativa	light responsive element
TaARFA1a-D	Sp1	GGGCGG	579	6	-	Oryza sativa	light responsive element
TaARFA1a-D	Sp1	GGGCGG	843	6	-	Oryza sativa	light responsive element
TaARFA1a-D	MBS	CAACTG	1491	6	-	Arabidopsis thaliana	MYB binding site involved in drought-inducibility
TaARFA1a-D	TGACG-motif	TGACG	488	5	-	Hordeum vulgare	cis-acting regulatory element involved in the MeJA-responsiveness
TaARFA1a-D	AuxRR-core	GGTCCAT	395	7	-	Nicotiana tabacum	cis-acting regulatory element involved in auxin responsiveness
TaARFA1a-D	A-box	CCGTCC	296	6	-	Petroselinum crispum	cis-acting regulatory element
TaARFA1a-D	A-box	CCGTCC	373	6	-	Petroselinum crispum	cis-acting regulatory element
TaARFA1a-D	A-box	CCGTCC	819	6	+	Petroselinum crispum	cis-acting regulatory element
TaARFA1a-D	CCAAT-box	CAACGG	991	6	-	Hordeum vulgare	MYBHv1 binding site
TaARFA1a-D	CCAAT-box	CAACGG	1285	6	+	Hordeum vulgare	MYBHv1 binding site
TaARFA1a-D	CAAT-box	CCAAT	102	5	+	Arabidopsis thaliana	common cis-acting element in promoter and enhancer regions
TaARFA1a-D	CAAT-box	CAAT	103	4	+	Nicotiana glutinosa
TaARFA1a-D	CAAT-box	CAAT	116	4	+	Nicotiana glutinosa
TaARFA1a-D	CAAT-box	CAAT	181	4	+	Nicotiana glutinosa
TaARFA1a-D	CAAT-box	CAAT	271	4	-	Nicotiana glutinosa
TaARFA1a-D	CAAT-box	CAAAT	467	5	-	Pisum sativum	common cis-acting element in promoter and enhancer regions
TaARFA1a-D	CAAT-box	CAAAT	505	5	-	Pisum sativum	common cis-acting element in promoter and enhancer regions
TaARFA1a-D	CAAT-box	CAAT	787	4	-	Nicotiana glutinosa
TaARFA1a-D	CAAT-box	CAAAT	1041	5	-	Pisum sativum	common cis-acting element in promoter and enhancer regions
TaARFA1a-D	CAAT-box	CAAT	1091	4	-	Nicotiana glutinosa
TaARFA1a-D	CAAT-box	CAAT	1261	4	-	Nicotiana glutinosa
TaARFA1a-D	CAAT-box	CAAAT	1291	5	+	Pisum sativum	common cis-acting element in promoter and enhancer regions
TaARFA1a-D	CAAT-box	CCAAT	1376	5	+	Arabidopsis thaliana	common cis-acting element in promoter and enhancer regions
TaARFA1a-D	CAAT-box	CAAT	1377	4	+	Nicotiana glutinosa
TaARFA1a-D	CAAT-box	CAAT	1447	4	+	Nicotiana glutinosa
TaARFA1a-D	CAAT-box	CAAAT	1454	5	-	Pisum sativum	common cis-acting element in promoter and enhancer regions
TaARFA1a-D	CAAT-box	CAAT	1468	4	+	Nicotiana glutinosa
TaARFA1a-D	CGTCA-motif	CGTCA	488	5	+	Hordeum vulgare	cis-acting regulatory element involved in the MeJA-responsiveness
TaARFA1a-D	CAT-box	GCCACT	341	6	-	Arabidopsis thaliana	cis-acting regulatory element related to meristem expression
TaARFA1b-A	ARE	AAACCA	449	6	-	Zea mays	cis-acting regulatory element essential for the anaerobic induction
TaARFA1b-A	ARE	AAACCA	857	6	-	Zea mays	cis-acting regulatory element essential for the anaerobic induction
TaARFA1b-A	ARE	AAACCA	950	6	+	Zea mays	cis-acting regulatory element essential for the anaerobic induction
TaARFA1b-A	ARE	AAACCA	1240	6	+	Zea mays	cis-acting regulatory element essential for the anaerobic induction
TaARFA1b-A	G-box	GCCACGTGGA	374	9	-	Arabidopsis thaliana	cis-acting regulatory element involved in light responsiveness
TaARFA1b-A	G-box	CACGTG	376	6	+	Arabidopsis thaliana	cis-acting regulatory element involved in light responsiveness
TaARFA1b-A	G-box	CACGTC	1117	6	-	Zea mays	cis-acting regulatory element involved in light responsiveness
TaARFA1b-A	ABRE	CACGTG	376	6	+	Arabidopsis thaliana	cis-acting element involved in the abscisic acid responsiveness
TaARFA1b-A	ABRE	ACGTG	377	5	+	Arabidopsis thaliana	cis-acting element involved in the abscisic acid responsiveness
TaARFA1b-A	ABRE	AACCCGG	893	7	-	Arabidopsis thaliana	cis-acting element involved in the abscisic acid responsiveness
TaARFA1b-A	ABRE	ACGTG	1118	5	+	Arabidopsis thaliana	cis-acting element involved in the abscisic acid responsiveness
TaARFA1b-A	TATA-box	TATA	559	4	+	Arabidopsis thaliana	core promoter element around -30 of transcription start
TaARFA1b-A	TATA-box	ATTATA	834	6	+	Brassica napus	core promoter element around -30 of transcription start
TaARFA1b-A	TATA-box	TATAA	835	5	-	Arabidopsis thaliana	core promoter element around -30 of transcription start
TaARFA1b-A	TATA-box	TATA	836	4	-	Arabidopsis thaliana	core promoter element around -30 of transcription start
TaARFA1b-A	TATA-box	TATAA	913	5	-	Arabidopsis thaliana	core promoter element around -30 of transcription start
TaARFA1b-A	TATA-box	TATA	914	4	-	Arabidopsis thaliana	core promoter element around -30 of transcription start
TaARFA1b-A	TATA-box	ATATAA	1050	6	+	Brassica oleracea	core promoter element around -30 of transcription start
TaARFA1b-A	TATA-box	TATA	1051	4	-	Arabidopsis thaliana	core promoter element around -30 of transcription start
TaARFA1b-A	TATA-box	ATATAA	1066	6	+	Brassica oleracea	core promoter element around -30 of transcription start
TaARFA1b-A	TATA-box	TATA	1067	4	-	Arabidopsis thaliana	core promoter element around -30 of transcription start
TaARFA1b-A	TATA-box	taTATAAAtc	1306	9	-	Arabidopsis thaliana	core promoter element around -30 of transcription start
TaARFA1b-A	TATA-box	TATAAAT	1307	7	-	Brassica juncea	core promoter element around -30 of transcription start
TaARFA1b-A	TATA-box	TATAAA	1308	6	-	Helianthus annuus	core promoter element around -30 of transcription start
TaARFA1b-A	TATA-box	TATATAA	1309	7	-	Arabidopsis thaliana	core promoter element around -30 of transcription start
TaARFA1b-A	TATA-box	TATATA	1310	6	-	Arabidopsis thaliana	core promoter element around -30 of transcription start
TaARFA1b-A	TATA-box	ATATAA	1311	6	+	Brassica oleracea	core promoter element around -30 of transcription start
TaARFA1b-A	TATA-box	TATA	1312	4	-	Arabidopsis thaliana	core promoter element around -30 of transcription start
TaARFA1b-A	TATA-box	TACAAAA	1423	7	+	Oryza sativa	core promoter element around -30 of transcription start
TaARFA1b-A	G-Box	CACGTG	376	6	+	Pisum sativum	cis-acting regulatory element involved in light responsiveness
TaARFA1b-A	TGA-element	AACGAC	1114	6	+	Brassica oleracea	auxin-responsive element
TaARFA1b-A	MBS	CAACTG	423	6	-	Arabidopsis thaliana	MYB binding site involved in drought-inducibility
TaARFA1b-A	TGACG-motif	TGACG	334	5	-	Hordeum vulgare	cis-acting regulatory element involved in the MeJA-responsiveness
TaARFA1b-A	TGACG-motif	TGACG	1253	5	-	Hordeum vulgare	cis-acting regulatory element involved in the MeJA-responsiveness
TaARFA1b-A	TATC-box	TATCCCA	838	7	+	Oryza sativa	cis-acting element involved in gibberellin-responsiveness
TaARFA1b-A	CAT-box	GCCACT	317	6	-	Arabidopsis thaliana	cis-acting regulatory element related to meristem expression
TaARFA1b-A	CAT-box	GCCACT	717	6	+	Arabidopsis thaliana	cis-acting regulatory element related to meristem expression
TaARFA1b-A	CAAT-box	CAAT	53	4	-	Nicotiana glutinosa
TaARFA1b-A	CAAT-box	CAAT	200	4	+	Nicotiana glutinosa
TaARFA1b-A	CAAT-box	CAAT	218	4	-	Nicotiana glutinosa
TaARFA1b-A	CAAT-box	CAAAT	222	5	-	Pisum sativum	common cis-acting element in promoter and enhancer regions
TaARFA1b-A	CAAT-box	CAAT	260	4	+	Nicotiana glutinosa
TaARFA1b-A	CAAT-box	CAAT	274	4	-	Nicotiana glutinosa
TaARFA1b-A	CAAT-box	CAAAT	327	5	-	Pisum sativum	common cis-acting element in promoter and enhancer regions
TaARFA1b-A	CAAT-box	CAAAT	400	5	+	Pisum sativum	common cis-acting element in promoter and enhancer regions
TaARFA1b-A	CAAT-box	CCAAT	807	5	-	Arabidopsis thaliana	common cis-acting element in promoter and enhancer regions
TaARFA1b-A	CAAT-box	CCAAT	870	5	-	Arabidopsis thaliana	common cis-acting element in promoter and enhancer regions
TaARFA1b-A	CAAT-box	CCAAT	971	5	-	Arabidopsis thaliana	common cis-acting element in promoter and enhancer regions
TaARFA1b-A	CAAT-box	CCAAT	979	5	+	Arabidopsis thaliana	common cis-acting element in promoter and enhancer regions
TaARFA1b-A	CAAT-box	CAAT	980	4	+	Nicotiana glutinosa
TaARFA1b-A	CAAT-box	CCAAT	1024	5	-	Arabidopsis thaliana	common cis-acting element in promoter and enhancer regions
TaARFA1b-A	CAAT-box	CCAAT	1037	5	-	Arabidopsis thaliana	common cis-acting element in promoter and enhancer regions
TaARFA1b-A	CAAT-box	CAAAT	1109	5	+	Pisum sativum	common cis-acting element in promoter and enhancer regions
TaARFA1b-A	CAAT-box	CCAAT	1135	5	+	Arabidopsis thaliana	common cis-acting element in promoter and enhancer regions
TaARFA1b-A	CAAT-box	CAAT	1136	4	+	Nicotiana glutinosa
TaARFA1b-A	CAAT-box	CAAT	1256	4	+	Nicotiana glutinosa
TaARFA1b-A	CAAT-box	CAAT	1261	4	+	Nicotiana glutinosa
TaARFA1b-A	CAAT-box	CAAT	1267	4	-	Nicotiana glutinosa
TaARFA1b-A	CAAT-box	CAAAT	1353	5	-	Pisum sativum	common cis-acting element in promoter and enhancer regions
TaARFA1b-A	CAAT-box	CAAT	1363	4	-	Nicotiana glutinosa
TaARFA1b-A	LTR	CCGAAA	947	6	+	Hordeum vulgare	cis-acting element involved in low-temperature responsiveness
TaARFA1b-A	CGTCA-motif	CGTCA	334	5	+	Hordeum vulgare	cis-acting regulatory element involved in the MeJA-responsiveness
TaARFA1b-A	CGTCA-motif	CGTCA	1253	5	+	Hordeum vulgare	cis-acting regulatory element involved in the MeJA-responsiveness
TaARFA1c-D	CAAT-box	CAAT	69	4	+	Nicotiana glutinosa
TaARFA1c-D	CAAT-box	CAAAT	171	5	-	Pisum sativum	common cis-acting element in promoter and enhancer regions
TaARFA1c-D	CAAT-box	CAAAT	190	5	-	Pisum sativum	common cis-acting element in promoter and enhancer regions
TaARFA1c-D	CAAT-box	CCAAT	386	5	-	Arabidopsis thaliana	common cis-acting element in promoter and enhancer regions
TaARFA1c-D	CAAT-box	CAAT	440	4	+	Nicotiana glutinosa
TaARFA1c-D	CAAT-box	CAAAT	535	5	-	Pisum sativum	common cis-acting element in promoter and enhancer regions
TaARFA1c-D	CAAT-box	CCAAT	673	5	+	Arabidopsis thaliana	common cis-acting element in promoter and enhancer regions
TaARFA1c-D	CAAT-box	CAAT	674	4	+	Nicotiana glutinosa
TaARFA1c-D	CAAT-box	CAAT	689	4	-	Nicotiana glutinosa
TaARFA1c-D	CAAT-box	CAAT	757	4	+	Nicotiana glutinosa
TaARFA1c-D	CAAT-box	CAAAT	1017	5	-	Pisum sativum	common cis-acting element in promoter and enhancer regions
TaARFA1c-D	CAAT-box	CAAT	1023	4	-	Nicotiana glutinosa
TaARFA1c-D	CAAT-box	CAAAT	1029	5	-	Pisum sativum	common cis-acting element in promoter and enhancer regions
TaARFA1c-D	CAAT-box	CAAT	1062	4	+	Nicotiana glutinosa
TaARFA1c-D	CAAT-box	CAAAT	1064	5	-	Pisum sativum	common cis-acting element in promoter and enhancer regions
TaARFA1c-D	CAAT-box	CAAT	1191	4	+	Nicotiana glutinosa
TaARFA1c-D	CAAT-box	CAAAT	1200	5	+	Pisum sativum	common cis-acting element in promoter and enhancer regions
TaARFA1c-D	CAAT-box	CCAAT	1495	5	-	Arabidopsis thaliana	common cis-acting element in promoter and enhancer regions
TaARFA1c-D	CGTCA-motif	CGTCA	293	5	+	Hordeum vulgare	cis-acting regulatory element involved in the MeJA-responsiveness
TaARFA1c-D	CGTCA-motif	CGTCA	382	5	+	Hordeum vulgare	cis-acting regulatory element involved in the MeJA-responsiveness
TaARFA1c-D	CGTCA-motif	CGTCA	474	5	-	Hordeum vulgare	cis-acting regulatory element involved in the MeJA-responsiveness
TaARFA1c-D	CGTCA-motif	CGTCA	531	5	+	Hordeum vulgare	cis-acting regulatory element involved in the MeJA-responsiveness
TaARFA1c-D	CGTCA-motif	CGTCA	723	5	+	Hordeum vulgare	cis-acting regulatory element involved in the MeJA-responsiveness
TaARFA1c-D	CGTCA-motif	CGTCA	754	5	+	Hordeum vulgare	cis-acting regulatory element involved in the MeJA-responsiveness
TaARFA1c-D	CGTCA-motif	CGTCA	768	5	+	Hordeum vulgare	cis-acting regulatory element involved in the MeJA-responsiveness
TaARFA1c-D	Box 4	ATTAAT	947	6	-	Petroselinum crispum	part of a conserved DNA module involved in light responsiveness
TaARFA1c-D	TGACG-motif	TGACG	293	5	-	Hordeum vulgare	cis-acting regulatory element involved in the MeJA-responsiveness
TaARFA1c-D	TGACG-motif	TGACG	382	5	-	Hordeum vulgare	cis-acting regulatory element involved in the MeJA-responsiveness
TaARFA1c-D	TGACG-motif	TGACG	474	5	+	Hordeum vulgare	cis-acting regulatory element involved in the MeJA-responsiveness
TaARFA1c-D	TGACG-motif	TGACG	531	5	-	Hordeum vulgare	cis-acting regulatory element involved in the MeJA-responsiveness
TaARFA1c-D	TGACG-motif	TGACG	723	5	-	Hordeum vulgare	cis-acting regulatory element involved in the MeJA-responsiveness
TaARFA1c-D	TGACG-motif	TGACG	754	5	-	Hordeum vulgare	cis-acting regulatory element involved in the MeJA-responsiveness
TaARFA1c-D	TGACG-motif	TGACG	768	5	-	Hordeum vulgare	cis-acting regulatory element involved in the MeJA-responsiveness
TaARFA1c-D	G-Box	CACGTT	239	6	-	Pisum sativum	cis-acting regulatory element involved in light responsiveness
TaARFA1c-D	Sp1	GGGCGG	461	6	-	Oryza sativa	light responsive element
TaARFA1c-D	Sp1	GGGCGG	465	6	-	Oryza sativa	light responsive element
TaARFA1c-D	TATA-box	TATAA	198	5	-	Arabidopsis thaliana	core promoter element around -30 of transcription start
TaARFA1c-D	TATA-box	TATA	199	4	+	Arabidopsis thaliana	core promoter element around -30 of transcription start
TaARFA1c-D	TATA-box	ATTATA	280	6	+	Brassica napus	core promoter element around -30 of transcription start
TaARFA1c-D	TATA-box	TATAA	281	5	-	Arabidopsis thaliana	core promoter element around -30 of transcription start
TaARFA1c-D	TATA-box	TATA	282	4	+	Arabidopsis thaliana	core promoter element around -30 of transcription start
TaARFA1c-D	TATA-box	TATA	410	4	+	Arabidopsis thaliana	core promoter element around -30 of transcription start
TaARFA1c-D	TATA-box	TATAAATA	835	8	-	Daucus carota	core promoter element around -30 of transcription start
TaARFA1c-D	TATA-box	TATAAAT	836	7	-	Brassica juncea	core promoter element around -30 of transcription start
TaARFA1c-D	TATA-box	TATAAA	837	6	-	Helianthus annuus	core promoter element around -30 of transcription start
TaARFA1c-D	TATA-box	TATAA	838	5	-	Arabidopsis thaliana	core promoter element around -30 of transcription start
TaARFA1c-D	TATA-box	TATA	839	4	-	Arabidopsis thaliana	core promoter element around -30 of transcription start
TaARFA1c-D	G-box	TACGTG	270	6	+	Arabidopsis thaliana	cis-acting regulatory element involved in light responsiveness
TaARFA1c-D	G-box	CACGAC	324	6	-	Zea mays	cis-acting regulatory element involved in light responsiveness
TaARFA1c-D	G-box	CACGAC	364	6	-	Zea mays	cis-acting regulatory element involved in light responsiveness
TaARFA1c-D	G-box	CACGAC	578	6	-	Zea mays	cis-acting regulatory element involved in light responsiveness
TaARFA1c-D	G-box	CACGTC	1050	6	-	Zea mays	cis-acting regulatory element involved in light responsiveness
TaARFA1c-D	G-box	CACGAC	1148	6	+	Zea mays	cis-acting regulatory element involved in light responsiveness
TaARFA1c-D	GC-motif	CCCCCG	1092	6	-	Zea mays	enhancer-like element involved in anoxic specific inducibility
TaARFA1c-D	ABRE	ACGTG	240	5	+	Arabidopsis thaliana	cis-acting element involved in the abscisic acid responsiveness
TaARFA1c-D	ABRE	ACGTG	271	5	+	Arabidopsis thaliana	cis-acting element involved in the abscisic acid responsiveness
TaARFA1c-D	ABRE	AACCCGG	397	7	-	Arabidopsis thaliana	cis-acting element involved in the abscisic acid responsiveness
TaARFA1c-D	ABRE	ACGTG	1051	5	+	Arabidopsis thaliana	cis-acting element involved in the abscisic acid responsiveness
TaARFA1d-A	Box 4	ATTAAT	392	6	+	Petroselinum crispum	part of a conserved DNA module involved in light responsiveness
TaARFA1d-A	MBS	CAACTG	978	6	+	Arabidopsis thaliana	MYB binding site involved in drought-inducibility
TaARFA1d-A	MBS	CAACTG	1113	6	-	Arabidopsis thaliana	MYB binding site involved in drought-inducibility
TaARFA1d-A	G-Box	CACGTG	1011	6	-	Pisum sativum	cis-acting regulatory element involved in light responsiveness
TaARFA1d-A	G-Box	CACGTG	1437	6	-	Pisum sativum	cis-acting regulatory element involved in light responsiveness
TaARFA1d-A	TGA-element	AACGAC	1107	6	-	Brassica oleracea	auxin-responsive element
TaARFA1d-A	LTR	CCGAAA	217	6	-	Hordeum vulgare	cis-acting element involved in low-temperature responsiveness
TaARFA1d-A	CAAT-box	CAAT	40	4	-	Nicotiana glutinosa
TaARFA1d-A	CAAT-box	CAAT	45	4	-	Nicotiana glutinosa
TaARFA1d-A	CAAT-box	CAAT	86	4	-	Nicotiana glutinosa
TaARFA1d-A	CAAT-box	CAAT	287	4	+	Nicotiana glutinosa
TaARFA1d-A	CAAT-box	CAAT	296	4	+	Nicotiana glutinosa
TaARFA1d-A	CAAT-box	CAAT	298	4	-	Nicotiana glutinosa
TaARFA1d-A	CAAT-box	CAAAT	419	5	-	Pisum sativum	common cis-acting element in promoter and enhancer regions
TaARFA1d-A	CAAT-box	CAAT	524	4	+	Nicotiana glutinosa
TaARFA1d-A	CAAT-box	CAAAT	557	5	-	Pisum sativum	common cis-acting element in promoter and enhancer regions
TaARFA1d-A	CAAT-box	CAAT	603	4	-	Nicotiana glutinosa
TaARFA1d-A	CAAT-box	CAAT	769	4	-	Nicotiana glutinosa
TaARFA1d-A	CAAT-box	CAAT	788	4	-	Nicotiana glutinosa
TaARFA1d-A	CAAT-box	CCAAT	794	5	-	Arabidopsis thaliana	common cis-acting element in promoter and enhancer regions
TaARFA1d-A	CAAT-box	CAAT	825	4	-	Nicotiana glutinosa
TaARFA1d-A	CAAT-box	CAAT	923	4	+	Nicotiana glutinosa
TaARFA1d-A	CAAT-box	CAAT	1102	4	+	Nicotiana glutinosa
TaARFA1d-A	TATA-box	TATAAA	76	6	-	Helianthus annuus	core promoter element around -30 of transcription start
TaARFA1d-A	TATA-box	TATAA	77	5	-	Arabidopsis thaliana	core promoter element around -30 of transcription start
TaARFA1d-A	TATA-box	TATA	78	4	+	Arabidopsis thaliana	core promoter element around -30 of transcription start
TaARFA1d-A	TATA-box	TATA	104	4	+	Arabidopsis thaliana	core promoter element around -30 of transcription start
TaARFA1d-A	TATA-box	TATATA	247	6	+	Arabidopsis thaliana	core promoter element around -30 of transcription start
TaARFA1d-A	TATA-box	TATA	249	4	+	Arabidopsis thaliana	core promoter element around -30 of transcription start
TaARFA1d-A	TATA-box	TACAAAA	458	7	+	Oryza sativa	core promoter element around -30 of transcription start
TaARFA1d-A	TATA-box	TAAAGATT	1174	8	-	Arabidopsis thaliana	core promoter element around -30 of transcription start
TaARFA1d-A	TATA-box	TATAAA	1178	6	-	Helianthus annuus	core promoter element around -30 of transcription start
TaARFA1d-A	TATA-box	TATAA	1179	5	-	Arabidopsis thaliana	core promoter element around -30 of transcription start
TaARFA1d-A	TATA-box	TATA	1180	4	-	Arabidopsis thaliana	core promoter element around -30 of transcription start
TaARFA1d-A	TATA-box	TATA	1312	4	-	Arabidopsis thaliana	core promoter element around -30 of transcription start
TaARFA1d-A	TATA-box	TATATA	1464	6	-	Arabidopsis thaliana	core promoter element around -30 of transcription start
TaARFA1d-A	TATA-box	TATA	1466	4	-	Arabidopsis thaliana	core promoter element around -30 of transcription start
TaARFA1d-A	ABRE	TACGTGTC	33	8	-	Oryza sativa	cis-acting element involved in the abscisic acid responsiveness
TaARFA1d-A	ABRE	ACGTG	35	5	-	Arabidopsis thaliana	cis-acting element involved in the abscisic acid responsiveness
TaARFA1d-A	ABRE	ACGTG	237	5	+	Arabidopsis thaliana	cis-acting element involved in the abscisic acid responsiveness
TaARFA1d-A	ABRE	CACGTG	1011	6	-	Arabidopsis thaliana	cis-acting element involved in the abscisic acid responsiveness
TaARFA1d-A	ABRE	ACGTG	1012	5	+	Arabidopsis thaliana	cis-acting element involved in the abscisic acid responsiveness
TaARFA1d-A	ABRE	CACGTG	1437	6	-	Arabidopsis thaliana	cis-acting element involved in the abscisic acid responsiveness
TaARFA1d-A	ABRE	ACGTG	1438	5	+	Arabidopsis thaliana	cis-acting element involved in the abscisic acid responsiveness
TaARFA1d-A	ARE	AAACCA	679	6	+	Zea mays	cis-acting regulatory element essential for the anaerobic induction
TaARFA1d-A	G-box	TACGTG	35	6	-	Arabidopsis thaliana	cis-acting regulatory element involved in light responsiveness
TaARFA1d-A	G-box	CACGTC	236	6	-	Zea mays	cis-acting regulatory element involved in light responsiveness
TaARFA1d-A	G-box	CACGAC	911	6	-	Zea mays	cis-acting regulatory element involved in light responsiveness
TaARFA1d-A	G-box	CACGTG	1011	6	-	Arabidopsis thaliana	cis-acting regulatory element involved in light responsiveness
TaARFA1d-A	G-box	CACGTG	1437	6	-	Arabidopsis thaliana	cis-acting regulatory element involved in light responsiveness
TaARFA1d-A	O2-site	GATGACATGG	110	9	-	Zea mays	cis-acting regulatory element involved in zein metabolism regulation
TaARFA1d-A	Sp1	GGGCGG	1483	6	-	Oryza sativa	light responsive element
TaARFA1d-A	TCA-element	CCATCTTTTT	64	10	-	Nicotiana tabacum	cis-acting element involved in salicylic acid responsiveness
TaARFA1d-A	ACE	GACACGTATG	33	9	+	Petroselinum crispum	cis-acting element involved in light responsiveness
TaARFA1d-B	TGACG-motif	TGACG	157	5	+	Hordeum vulgare	cis-acting regulatory element involved in the MeJA-responsiveness
TaARFA1d-B	TGACG-motif	TGACG	441	5	+	Hordeum vulgare	cis-acting regulatory element involved in the MeJA-responsiveness
TaARFA1d-B	G-Box	CACGTG	846	6	-	Pisum sativum	cis-acting regulatory element involved in light responsiveness
TaARFA1d-B	GARE-motif	TCTGTTG	206	7	-	Brassica oleracea	gibberellin-responsive element
TaARFA1d-B	GARE-motif	TCTGTTG	219	7	-	Brassica oleracea	gibberellin-responsive element
TaARFA1d-B	A-box	CCGTCC	711	6	+	Petroselinum crispum	cis-acting regulatory element
TaARFA1d-B	CGTCA-motif	CGTCA	157	5	-	Hordeum vulgare	cis-acting regulatory element involved in the MeJA-responsiveness
TaARFA1d-B	CGTCA-motif	CGTCA	441	5	-	Hordeum vulgare	cis-acting regulatory element involved in the MeJA-responsiveness
TaARFA1d-B	CAAT-box	CAAT	57	4	+	Nicotiana glutinosa
TaARFA1d-B	CAAT-box	CAAT	439	4	-	Nicotiana glutinosa
TaARFA1d-B	CAAT-box	CAAT	469	4	+	Nicotiana glutinosa
TaARFA1d-B	CAAT-box	CAAT	613	4	-	Nicotiana glutinosa
TaARFA1d-B	CAAT-box	CAAAT	617	5	+	Pisum sativum	common cis-acting element in promoter and enhancer regions
TaARFA1d-B	CAAT-box	CCAAT	1219	5	-	Arabidopsis thaliana	common cis-acting element in promoter and enhancer regions
TaARFA1d-B	CAAT-box	CAAAT	1379	5	-	Pisum sativum	common cis-acting element in promoter and enhancer regions
TaARFA1d-B	CAT-box	GCCACT	508	6	+	Arabidopsis thaliana	cis-acting regulatory element related to meristem expression
TaARFA1d-B	CAT-box	GCCACT	1276	6	+	Arabidopsis thaliana	cis-acting regulatory element related to meristem expression
TaARFA1d-B	TATA-box	ccTATAAAaa	418	9	+	Arabidopsis thaliana	core promoter element around -30 of transcription start
TaARFA1d-B	TATA-box	TATA	420	4	+	Arabidopsis thaliana	core promoter element around -30 of transcription start
TaARFA1d-B	TATA-box	ATATAA	727	6	+	Brassica oleracea	core promoter element around -30 of transcription start
TaARFA1d-B	TATA-box	TATA	728	4	+	Arabidopsis thaliana	core promoter element around -30 of transcription start
TaARFA1d-B	TATA-box	TATATA	873	6	-	Arabidopsis thaliana	core promoter element around -30 of transcription start
TaARFA1d-B	TATA-box	ATATAT	874	6	-	Brassica napus	core promoter element around -30 of transcription start
TaARFA1d-B	TATA-box	TATA	875	4	-	Arabidopsis thaliana	core promoter element around -30 of transcription start
TaARFA1d-B	GC-motif	CCCCCG	971	6	+	Zea mays	enhancer-like element involved in anoxic specific inducibility
TaARFA1d-B	ABRE	CACGTG	846	6	-	Arabidopsis thaliana	cis-acting element involved in the abscisic acid responsiveness
TaARFA1d-B	ABRE	ACGTG	847	5	+	Arabidopsis thaliana	cis-acting element involved in the abscisic acid responsiveness
TaARFA1d-B	ARE	AAACCA	501	6	+	Zea mays	cis-acting regulatory element essential for the anaerobic induction
TaARFA1d-B	G-box	CACGAC	213	6	+	Zea mays	cis-acting regulatory element involved in light responsiveness
TaARFA1d-B	G-box	CACGAC	266	6	+	Zea mays	cis-acting regulatory element involved in light responsiveness
TaARFA1d-B	G-box	GCCACGTGGA	844	9	+	Arabidopsis thaliana	cis-acting regulatory element involved in light responsiveness
TaARFA1d-B	G-box	CACGTG	846	6	-	Arabidopsis thaliana	cis-acting regulatory element involved in light responsiveness
TaARFA1d-B	G-box	CACGAC	918	6	+	Zea mays	cis-acting regulatory element involved in light responsiveness
TaARFA1d-B	TCA-element	CCATCTTTTT	423	9	-	Nicotiana tabacum	cis-acting element involved in salicylic acid responsiveness
TaARFA1d-B	Sp1	GGGCGG	820	6	+	Oryza sativa	light responsive element
TaARFA1d-B	Sp1	GGGCGG	891	6	-	Oryza sativa	light responsive element
TaARFA1d-B	Sp1	GGGCGG	1098	6	-	Oryza sativa	light responsive element
TaARFA1d-D	G-box	CACGTG	642	6	+	Arabidopsis thaliana	cis-acting regulatory element involved in light responsiveness
TaARFA1d-D	G-box	GCCACGTGGA	1227	9	+	Arabidopsis thaliana	cis-acting regulatory element involved in light responsiveness
TaARFA1d-D	G-box	CACGTG	1229	6	-	Arabidopsis thaliana	cis-acting regulatory element involved in light responsiveness
TaARFA1d-D	G-box	CACGAC	1301	6	+	Zea mays	cis-acting regulatory element involved in light responsiveness
TaARFA1d-D	GC-motif	CCCCCG	1467	6	+	Zea mays	enhancer-like element involved in anoxic specific inducibility
TaARFA1d-D	ABRE	ACGTG	327	5	-	Arabidopsis thaliana	cis-acting element involved in the abscisic acid responsiveness
TaARFA1d-D	ABRE	ACGTG	354	5	-	Arabidopsis thaliana	cis-acting element involved in the abscisic acid responsiveness
TaARFA1d-D	ABRE	CACGTG	642	6	+	Arabidopsis thaliana	cis-acting element involved in the abscisic acid responsiveness
TaARFA1d-D	ABRE	ACGTG	643	5	+	Arabidopsis thaliana	cis-acting element involved in the abscisic acid responsiveness
TaARFA1d-D	ABRE	ACGTG	766	5	-	Arabidopsis thaliana	cis-acting element involved in the abscisic acid responsiveness
TaARFA1d-D	ABRE	CACGTG	1229	6	-	Arabidopsis thaliana	cis-acting element involved in the abscisic acid responsiveness
TaARFA1d-D	ABRE	ACGTG	1230	5	+	Arabidopsis thaliana	cis-acting element involved in the abscisic acid responsiveness
TaARFA1d-D	TATA-box	taTATAAAtc	260	9	-	Arabidopsis thaliana	core promoter element around -30 of transcription start
TaARFA1d-D	TATA-box	TATAAA	262	6	-	Helianthus annuus	core promoter element around -30 of transcription start
TaARFA1d-D	TATA-box	TATATAA	263	7	-	Arabidopsis thaliana	core promoter element around -30 of transcription start
TaARFA1d-D	TATA-box	TATATA	264	6	+	Arabidopsis thaliana	core promoter element around -30 of transcription start
TaARFA1d-D	TATA-box	ATATAA	265	6	+	Brassica oleracea	core promoter element around -30 of transcription start
TaARFA1d-D	TATA-box	TATA	266	4	+	Arabidopsis thaliana	core promoter element around -30 of transcription start
TaARFA1d-D	TATA-box	ATTATA	795	6	+	Brassica napus	core promoter element around -30 of transcription start
TaARFA1d-D	TATA-box	TATAA	796	5	-	Arabidopsis thaliana	core promoter element around -30 of transcription start
TaARFA1d-D	TATA-box	TATA	797	4	-	Arabidopsis thaliana	core promoter element around -30 of transcription start
TaARFA1d-D	TATA-box	ccTATAAAaa	970	9	+	Arabidopsis thaliana	core promoter element around -30 of transcription start
TaARFA1d-D	TATA-box	TATA	1100	4	-	Arabidopsis thaliana	core promoter element around -30 of transcription start
TaARFA1d-D	TATA-box	TATATA	1256	6	-	Arabidopsis thaliana	core promoter element around -30 of transcription start
TaARFA1d-D	TATA-box	TATA	1258	4	-	Arabidopsis thaliana	core promoter element around -30 of transcription start
TaARFA1d-D	TCA-element	CCATCTTTTT	340	9	-	Nicotiana tabacum	cis-acting element involved in salicylic acid responsiveness
TaARFA1d-D	TCA-element	TCAGAAGAGG	381	9	+	Brassica oleracea	cis-acting element involved in salicylic acid responsiveness
TaARFA1d-D	Sp1	GGGCGG	1203	6	+	Oryza sativa	light responsive element
TaARFA1d-D	Sp1	GGGCGG	1274	6	-	Oryza sativa	light responsive element
TaARFA1d-D	O2-site	GTTGACGTGA	221	9	-	Zea mays	cis-acting regulatory element involved in zein metabolism regulation
TaARFA1d-D	G-Box	CACGTT	327	6	+	Pisum sativum	cis-acting regulatory element involved in light responsiveness
TaARFA1d-D	G-Box	CACGTT	354	6	+	Pisum sativum	cis-acting regulatory element involved in light responsiveness
TaARFA1d-D	G-Box	CACGTG	642	6	+	Pisum sativum	cis-acting regulatory element involved in light responsiveness
TaARFA1d-D	G-Box	CACGTT	766	6	+	Pisum sativum	cis-acting regulatory element involved in light responsiveness
TaARFA1d-D	G-Box	CACGTG	1229	6	-	Pisum sativum	cis-acting regulatory element involved in light responsiveness
TaARFA1d-D	A-box	CCGTCC	206	6	-	Petroselinum crispum	cis-acting regulatory element
TaARFA1d-D	MBS	CAACTG	927	6	-	Arabidopsis thaliana	MYB binding site involved in drought-inducibility
TaARFA1d-D	CAAT-box	CAAT	134	4	-	Nicotiana glutinosa
TaARFA1d-D	CAAT-box	CAAT	202	4	+	Nicotiana glutinosa
TaARFA1d-D	CAAT-box	CAAT	246	4	+	Nicotiana glutinosa
TaARFA1d-D	CAAT-box	CCAAT	277	5	-	Arabidopsis thaliana	common cis-acting element in promoter and enhancer regions
TaARFA1d-D	CAAT-box	CCAAT	504	5	-	Arabidopsis thaliana	common cis-acting element in promoter and enhancer regions
TaARFA1d-D	CAAT-box	CCAAT	519	5	-	Arabidopsis thaliana	common cis-acting element in promoter and enhancer regions
TaARFA1d-D	CAAT-box	CAAT	596	4	-	Nicotiana glutinosa
TaARFA1d-D	CAAT-box	CAAT	612	4	+	Nicotiana glutinosa
TaARFA1d-D	CAAT-box	CAAT	665	4	-	Nicotiana glutinosa
TaARFA1d-D	CAAT-box	TGCCAAC	727	7	-	Petunia hybrida	common cis-acting element in promoter and enhancer regions
TaARFA1d-D	CAAT-box	CAAT	881	4	-	Nicotiana glutinosa
TaARFA1d-D	CAAT-box	CAAT	916	4	-	Nicotiana glutinosa
TaARFA1d-D	CAAT-box	CAAT	1005	4	+	Nicotiana glutinosa
TaARFA1d-D	I-box	gGATAAGGTG	176	9	+	Zea mays	part of a light responsive element
TaARFA1d-D	LTR	CCGAAA	574	6	+	Hordeum vulgare	cis-acting element involved in low-temperature responsiveness
TaARFA1e-A	I-box	cGATAAGGCG	883	9	+	Zea mays	part of a light responsive element
TaARFA1e-A	I-box	GTATAAGGCC	1404	9	-	Larix laricina	part of a light responsive element
TaARFA1e-A	CGTCA-motif	CGTCA	1212	5	-	Hordeum vulgare	cis-acting regulatory element involved in the MeJA-responsiveness
TaARFA1e-A	CAAT-box	CAAT	11	4	-	Nicotiana glutinosa
TaARFA1e-A	CAAT-box	CAAAT	83	5	+	Pisum sativum	common cis-acting element in promoter and enhancer regions
TaARFA1e-A	CAAT-box	TGCCAAC	103	7	+	Petunia hybrida	common cis-acting element in promoter and enhancer regions
TaARFA1e-A	CAAT-box	CAAAT	172	5	-	Pisum sativum	common cis-acting element in promoter and enhancer regions
TaARFA1e-A	CAAT-box	CAAT	258	4	+	Nicotiana glutinosa
TaARFA1e-A	CAAT-box	CAAT	264	4	+	Nicotiana glutinosa
TaARFA1e-A	CAAT-box	CAAAT	349	5	+	Pisum sativum	common cis-acting element in promoter and enhancer regions
TaARFA1e-A	CAAT-box	CAAT	430	4	-	Nicotiana glutinosa
TaARFA1e-A	CAAT-box	CAAT	479	4	+	Nicotiana glutinosa
TaARFA1e-A	CAAT-box	CAAT	542	4	-	Nicotiana glutinosa
TaARFA1e-A	CAAT-box	CAAAT	609	5	+	Pisum sativum	common cis-acting element in promoter and enhancer regions
TaARFA1e-A	CAAT-box	CAAT	612	4	-	Nicotiana glutinosa
TaARFA1e-A	CAAT-box	CCAAT	754	5	+	Arabidopsis thaliana	common cis-acting element in promoter and enhancer regions
TaARFA1e-A	CAAT-box	CAAT	755	4	+	Nicotiana glutinosa
TaARFA1e-A	CAAT-box	CAAAT	799	5	+	Pisum sativum	common cis-acting element in promoter and enhancer regions
TaARFA1e-A	CAAT-box	CAAAT	1008	5	-	Pisum sativum	common cis-acting element in promoter and enhancer regions
TaARFA1e-A	CAAT-box	CAAT	1317	4	-	Nicotiana glutinosa
TaARFA1e-A	CAAT-box	CAAT	1332	4	-	Nicotiana glutinosa
TaARFA1e-A	CCAAT-box	CAACGG	341	6	-	Hordeum vulgare	MYBHv1 binding site
TaARFA1e-A	TGA-element	AACGAC	275	6	+	Brassica oleracea	auxin-responsive element
TaARFA1e-A	G-Box	CACGTT	1277	6	-	Pisum sativum	cis-acting regulatory element involved in light responsiveness
TaARFA1e-A	TGACG-motif	TGACG	1212	5	+	Hordeum vulgare	cis-acting regulatory element involved in the MeJA-responsiveness
TaARFA1e-A	GC-motif	CCCCCG	937	6	+	Zea mays	enhancer-like element involved in anoxic specific inducibility
TaARFA1e-A	ABRE	ACGTG	1278	5	+	Arabidopsis thaliana	cis-acting element involved in the abscisic acid responsiveness
TaARFA1e-A	ABRE	ACGTG	1451	5	-	Arabidopsis thaliana	cis-acting element involved in the abscisic acid responsiveness
TaARFA1e-A	G-box	TAAACGTG	1275	8	+	Brassica oleracea	cis-acting regulatory element involved in light responsiveness
TaARFA1e-A	G-box	TACGTG	1451	6	-	Arabidopsis thaliana	cis-acting regulatory element involved in light responsiveness
TaARFA1e-A	ARE	AAACCA	846	6	-	Zea mays	cis-acting regulatory element essential for the anaerobic induction
TaARFA1e-A	ARE	AAACCA	1122	6	-	Zea mays	cis-acting regulatory element essential for the anaerobic induction
TaARFA1e-A	TATA-box	TATAAA	145	6	-	Helianthus annuus	core promoter element around -30 of transcription start
TaARFA1e-A	TATA-box	TATAA	146	5	-	Arabidopsis thaliana	core promoter element around -30 of transcription start
TaARFA1e-A	TATA-box	TATA	147	4	+	Arabidopsis thaliana	core promoter element around -30 of transcription start
TaARFA1e-A	TATA-box	TATACA	238	6	-	Helianthus annuus	core promoter element around -30 of transcription start
TaARFA1e-A	TATA-box	TATA	240	4	+	Arabidopsis thaliana	core promoter element around -30 of transcription start
TaARFA1e-A	TATA-box	ATATAA	512	6	+	Brassica oleracea	core promoter element around -30 of transcription start
TaARFA1e-A	TATA-box	TATA	513	4	+	Arabidopsis thaliana	core promoter element around -30 of transcription start
TaARFA1e-A	TATA-box	ATATAA	522	6	+	Brassica oleracea	core promoter element around -30 of transcription start
TaARFA1e-A	TATA-box	TATA	523	4	+	Arabidopsis thaliana	core promoter element around -30 of transcription start
TaARFA1e-A	TATA-box	ccTATAAAaa	1439	9	+	Arabidopsis thaliana	core promoter element around -30 of transcription start
TaARFA1e-B	CGTCA-motif	CGTCA	1486	5	+	Hordeum vulgare	cis-acting regulatory element involved in the MeJA-responsiveness
TaARFA1e-B	CAAT-box	CAAT	60	4	-	Nicotiana glutinosa
TaARFA1e-B	CAAT-box	CCAAT	109	5	+	Arabidopsis thaliana	common cis-acting element in promoter and enhancer regions
TaARFA1e-B	CAAT-box	CAAT	110	4	+	Nicotiana glutinosa
TaARFA1e-B	CAAT-box	CAAT	139	4	+	Nicotiana glutinosa
TaARFA1e-B	CAAT-box	CAAAT	151	5	+	Pisum sativum	common cis-acting element in promoter and enhancer regions
TaARFA1e-B	CAAT-box	CAAT	170	4	+	Nicotiana glutinosa
TaARFA1e-B	CAAT-box	CAAT	1132	4	+	Nicotiana glutinosa
TaARFA1e-B	CAAT-box	CAAAT	1170	5	+	Pisum sativum	common cis-acting element in promoter and enhancer regions
TaARFA1e-B	CAAT-box	CAAT	1201	4	-	Nicotiana glutinosa
TaARFA1e-B	CAAT-box	CAAAT	1219	5	-	Pisum sativum	common cis-acting element in promoter and enhancer regions
TaARFA1e-B	CAAT-box	CAAT	1232	4	-	Nicotiana glutinosa
TaARFA1e-B	CAAT-box	CCAAT	1261	5	-	Arabidopsis thaliana	common cis-acting element in promoter and enhancer regions
TaARFA1e-B	CAAT-box	CAAT	1269	4	-	Nicotiana glutinosa
TaARFA1e-B	CAAT-box	CAAT	1313	4	-	Nicotiana glutinosa
TaARFA1e-B	A-box	CCGTCC	849	6	-	Petroselinum crispum	cis-acting regulatory element
TaARFA1e-B	A-box	CCGTCC	1058	6	+	Petroselinum crispum	cis-acting regulatory element
TaARFA1e-B	AuxRR-core	GGTCCAT	104	7	-	Nicotiana tabacum	cis-acting regulatory element involved in auxin responsiveness
TaARFA1e-B	AuxRR-core	GGTCCAT	1264	7	+	Nicotiana tabacum	cis-acting regulatory element involved in auxin responsiveness
TaARFA1e-B	TGA-element	AACGAC	974	6	+	Brassica oleracea	auxin-responsive element
TaARFA1e-B	G-Box	CACGTT	20	6	-	Pisum sativum	cis-acting regulatory element involved in light responsiveness
TaARFA1e-B	TGACG-motif	TGACG	1486	5	-	Hordeum vulgare	cis-acting regulatory element involved in the MeJA-responsiveness
TaARFA1e-B	Sp1	GGGCGG	956	6	+	Oryza sativa	light responsive element
TaARFA1e-B	Sp1	GGGCGG	1384	6	-	Oryza sativa	light responsive element
TaARFA1e-B	ABRE	ACGTG	21	5	+	Arabidopsis thaliana	cis-acting element involved in the abscisic acid responsiveness
TaARFA1e-B	ABRE	ACGTG	386	5	+	Arabidopsis thaliana	cis-acting element involved in the abscisic acid responsiveness
TaARFA1e-B	G-box	CACGAC	339	6	+	Zea mays	cis-acting regulatory element involved in light responsiveness
TaARFA1e-B	G-box	TACGTG	385	6	+	Arabidopsis thaliana	cis-acting regulatory element involved in light responsiveness
TaARFA1e-B	G-box	CACGAC	979	6	+	Zea mays	cis-acting regulatory element involved in light responsiveness
TaARFA1e-B	ARE	AAACCA	185	6	-	Zea mays	cis-acting regulatory element essential for the anaerobic induction
TaARFA1e-B	ARE	AAACCA	207	6	-	Zea mays	cis-acting regulatory element essential for the anaerobic induction
TaARFA1e-B	ARE	AAACCA	1161	6	+	Zea mays	cis-acting regulatory element essential for the anaerobic induction
TaARFA1e-B	ARE	AAACCA	1183	6	+	Zea mays	cis-acting regulatory element essential for the anaerobic induction
TaARFA1e-B	TATA-box	TAAAGATT	153	8	-	Arabidopsis thaliana	core promoter element around -30 of transcription start
TaARFA1e-B	P-box	CAACAAACCCCTT	1411	12	+	Petroselinum crispum	gibberellin-responsive element and part of a light responsive element
TaARFA1e-D	CAAT-box	CAAAT	217	5	-	Pisum sativum	common cis-acting element in promoter and enhancer regions
TaARFA1e-D	CAAT-box	CAAAT	447	5	-	Pisum sativum	common cis-acting element in promoter and enhancer regions
TaARFA1e-D	CAAT-box	CAAT	532	4	+	Nicotiana glutinosa
TaARFA1e-D	CAAT-box	CAAAT	534	5	-	Pisum sativum	common cis-acting element in promoter and enhancer regions
TaARFA1e-D	CAAT-box	CAAT	558	4	-	Nicotiana glutinosa
TaARFA1e-D	CAAT-box	CAAT	616	4	+	Nicotiana glutinosa
TaARFA1e-D	CAAT-box	CAAT	654	4	+	Nicotiana glutinosa
TaARFA1e-D	CAAT-box	CAAAT	737	5	-	Pisum sativum	common cis-acting element in promoter and enhancer regions
TaARFA1e-D	CAAT-box	CAAAT	757	5	+	Pisum sativum	common cis-acting element in promoter and enhancer regions
TaARFA1e-D	CAAT-box	CAAAT	779	5	-	Pisum sativum	common cis-acting element in promoter and enhancer regions
TaARFA1e-D	CAAT-box	CCAAT	798	5	+	Arabidopsis thaliana	common cis-acting element in promoter and enhancer regions
TaARFA1e-D	CAAT-box	CAAT	799	4	+	Nicotiana glutinosa
TaARFA1e-D	CAAT-box	CCAAT	858	5	+	Arabidopsis thaliana	common cis-acting element in promoter and enhancer regions
TaARFA1e-D	CAAT-box	CAAT	859	4	+	Nicotiana glutinosa
TaARFA1e-D	CAAT-box	CAAAT	931	5	+	Pisum sativum	common cis-acting element in promoter and enhancer regions
TaARFA1e-D	CAAT-box	CAAT	1022	4	+	Nicotiana glutinosa
TaARFA1e-D	CAAT-box	CAAT	1163	4	+	Nicotiana glutinosa
TaARFA1e-D	CAAT-box	CAAT	1168	4	-	Nicotiana glutinosa
TaARFA1e-D	CAAT-box	CAAAT	1270	5	-	Pisum sativum	common cis-acting element in promoter and enhancer regions
TaARFA1e-D	CAAT-box	CCAAT	1304	5	+	Arabidopsis thaliana	common cis-acting element in promoter and enhancer regions
TaARFA1e-D	CAAT-box	CAAT	1305	4	+	Nicotiana glutinosa
TaARFA1e-D	CAAT-box	CCAAT	1311	5	-	Arabidopsis thaliana	common cis-acting element in promoter and enhancer regions
TaARFA1e-D	CAAT-box	CAAT	1331	4	+	Nicotiana glutinosa
TaARFA1e-D	CAAT-box	CAAT	1479	4	-	Nicotiana glutinosa
TaARFA1e-D	CCAAT-box	CAACGG	307	6	-	Hordeum vulgare	MYBHv1 binding site
TaARFA1e-D	I-box	gGATAAGGTG	945	9	-	Zea mays	part of a light responsive element
TaARFA1e-D	TGA-element	AACGAC	725	6	+	Brassica oleracea	auxin-responsive element
TaARFA1e-D	G-Box	TCCACATGGCA	560	10	-	Triticum aestivum	cis-acting regulatory element involved in light responsiveness
TaARFA1e-D	MBS	CAACTG	1284	6	-	Arabidopsis thaliana	MYB binding site involved in drought-inducibility
TaARFA1e-D	Box 4	ATTAAT	1042	6	-	Petroselinum crispum	part of a conserved DNA module involved in light responsiveness
TaARFA1e-D	ACE	CTAACGTATT	404	9	-	Petroselinum crispum	cis-acting element involved in light responsiveness
TaARFA1e-D	Sp1	GGGCGG	194	6	-	Oryza sativa	light responsive element
TaARFA1e-D	ARE	AAACCA	941	6	+	Zea mays	cis-acting regulatory element essential for the anaerobic induction
TaARFA1e-D	G-box	CACGAC	355	6	-	Zea mays	cis-acting regulatory element involved in light responsiveness
TaARFA1e-D	G-box	CACGTC	988	6	+	Zea mays	cis-acting regulatory element involved in light responsiveness
TaARFA1e-D	ABRE	ACGTG	988	5	-	Arabidopsis thaliana	cis-acting element involved in the abscisic acid responsiveness
TaARFA1e-D	P-box	CCTTTTG	519	7	+	Oryza sativa	gibberellin-responsive element
TaARFA1e-D	TATA-box	TATA	21	4	+	Arabidopsis thaliana	core promoter element around -30 of transcription start
TaARFA1e-D	TATA-box	ATATAT	377	6	+	Brassica napus	core promoter element around -30 of transcription start
TaARFA1e-D	TATA-box	TATA	378	4	+	Arabidopsis thaliana	core promoter element around -30 of transcription start
TaARFA1e-D	TATA-box	TATAA	604	5	-	Arabidopsis thaliana	core promoter element around -30 of transcription start
TaARFA1e-D	TATA-box	TATA	605	4	+	Arabidopsis thaliana	core promoter element around -30 of transcription start
TaARFA1e-D	TATA-box	TAAAGATT	607	8	+	Arabidopsis thaliana	core promoter element around -30 of transcription start
TaARFA1e-D	TATA-box	TATATA	670	6	+	Arabidopsis thaliana	core promoter element around -30 of transcription start
TaARFA1e-D	TATA-box	TATA	672	4	+	Arabidopsis thaliana	core promoter element around -30 of transcription start
TaARFA1e-D	TATA-box	TATAA	714	5	-	Arabidopsis thaliana	core promoter element around -30 of transcription start
TaARFA1e-D	TATA-box	TATA	715	4	+	Arabidopsis thaliana	core promoter element around -30 of transcription start
TaARFA1e-D	TATA-box	ATTATA	836	6	+	Brassica napus	core promoter element around -30 of transcription start
TaARFA1e-D	TATA-box	TATAA	837	5	-	Arabidopsis thaliana	core promoter element around -30 of transcription start
TaARFA1e-D	TATA-box	TATA	838	4	-	Arabidopsis thaliana	core promoter element around -30 of transcription start
TaARFA1e-D	TATA-box	TATA	873	4	-	Arabidopsis thaliana	core promoter element around -30 of transcription start
TaARFA1e-D	TATA-box	TACAAAA	893	7	+	Oryza sativa	core promoter element around -30 of transcription start
TaARFA1e-D	TATA-box	ATTATA	1024	6	+	Brassica napus	core promoter element around -30 of transcription start
TaARFA1e-D	TATA-box	TATAA	1025	5	-	Arabidopsis thaliana	core promoter element around -30 of transcription start
TaARFA1e-D	TATA-box	TATA	1026	4	-	Arabidopsis thaliana	core promoter element around -30 of transcription start
TaARFA1e-D	TATA-box	TATA	1131	4	-	Arabidopsis thaliana	core promoter element around -30 of transcription start
TaARFA1e-D	TATA-box	TATAAAT	1372	7	-	Brassica juncea	core promoter element around -30 of transcription start
TaARFA1e-D	TATA-box	TATAAA	1373	6	-	Helianthus annuus	core promoter element around -30 of transcription start
TaARFA1e-D	TATA-box	TATAA	1374	5	-	Arabidopsis thaliana	core promoter element around -30 of transcription start
TaARFA1e-D	TATA-box	TATA	1375	4	-	Arabidopsis thaliana	core promoter element around -30 of transcription start
TaARFA1f-A	TGACG-motif	TGACG	101	5	+	Hordeum vulgare	cis-acting regulatory element involved in the MeJA-responsiveness
TaARFA1f-A	A-box	CCGTCC	837	6	+	Petroselinum crispum	cis-acting regulatory element
TaARFA1f-A	AuxRR-core	GGTCCAT	322	7	-	Nicotiana tabacum	cis-acting regulatory element involved in auxin responsiveness
TaARFA1f-A	CAAT-box	AGCTCAATTTCA	16	11	-	Daucus carota	common cis-acting element in promoter and enhancer regions
TaARFA1f-A	CAAT-box	CAAT	20	4	-	Nicotiana glutinosa
TaARFA1f-A	CAAT-box	CAAAT	59	5	-	Pisum sativum	common cis-acting element in promoter and enhancer regions
TaARFA1f-A	CAAT-box	CAAT	98	4	+	Nicotiana glutinosa
TaARFA1f-A	CAAT-box	CAAT	306	4	-	Nicotiana glutinosa
TaARFA1f-A	CAAT-box	CAAAT	398	5	-	Pisum sativum	common cis-acting element in promoter and enhancer regions
TaARFA1f-A	CAAT-box	CCAAT	414	5	+	Arabidopsis thaliana	common cis-acting element in promoter and enhancer regions
TaARFA1f-A	CAAT-box	CAAT	415	4	+	Nicotiana glutinosa
TaARFA1f-A	CAAT-box	CAAT	419	4	-	Nicotiana glutinosa
TaARFA1f-A	CAAT-box	CAAT	453	4	-	Nicotiana glutinosa
TaARFA1f-A	CAAT-box	CAAAT	497	5	-	Pisum sativum	common cis-acting element in promoter and enhancer regions
TaARFA1f-A	CAAT-box	CAAT	518	4	-	Nicotiana glutinosa
TaARFA1f-A	CAAT-box	CAAT	529	4	+	Nicotiana glutinosa
TaARFA1f-A	CGTCA-motif	CGTCA	101	5	-	Hordeum vulgare	cis-acting regulatory element involved in the MeJA-responsiveness
TaARFA1f-A	I-box	gGATAAGGTG	533	9	+	Zea mays	part of a light responsive element
TaARFA1f-A	I-box	gGATAAGGTG	695	9	-	Zea mays	part of a light responsive element
TaARFA1f-A	CAT-box	GCCACT	229	6	-	Arabidopsis thaliana	cis-acting regulatory element related to meristem expression
TaARFA1f-A	CAT-box	GCCACT	647	6	+	Arabidopsis thaliana	cis-acting regulatory element related to meristem expression
TaARFA1f-A	TCT-motif	TCTTAC	456	6	-	Arabidopsis thaliana	part of a light responsive element
TaARFA1f-A	ARE	AAACCA	253	6	+	Zea mays	cis-acting regulatory element essential for the anaerobic induction
TaARFA1f-A	GC-motif	CCCCCG	744	6	+	Zea mays	enhancer-like element involved in anoxic specific inducibility
TaARFA1f-A	Sp1	GGGCGG	690	6	-	Oryza sativa	light responsive element
TaARFA1f-B	A-box	CCGTCC	1394	6	+	Petroselinum crispum	cis-acting regulatory element
TaARFA1f-B	MBS	CAACTG	380	6	-	Arabidopsis thaliana	MYB binding site involved in drought-inducibility
TaARFA1f-B	Box 4	ATTAAT	205	6	+	Petroselinum crispum	part of a conserved DNA module involved in light responsiveness
TaARFA1f-B	TGACG-motif	TGACG	355	5	+	Hordeum vulgare	cis-acting regulatory element involved in the MeJA-responsiveness
TaARFA1f-B	TGACG-motif	TGACG	497	5	+	Hordeum vulgare	cis-acting regulatory element involved in the MeJA-responsiveness
TaARFA1f-B	TGACG-motif	TGACG	627	5	+	Hordeum vulgare	cis-acting regulatory element involved in the MeJA-responsiveness
TaARFA1f-B	CAT-box	GCCACT	453	6	-	Arabidopsis thaliana	cis-acting regulatory element related to meristem expression
TaARFA1f-B	CAT-box	GCCACT	747	6	-	Arabidopsis thaliana	cis-acting regulatory element related to meristem expression
TaARFA1f-B	CAT-box	GCCACT	1211	6	+	Arabidopsis thaliana	cis-acting regulatory element related to meristem expression
TaARFA1f-B	TATC-box	TATCCCA	302	7	+	Oryza sativa	cis-acting element involved in gibberellin-responsiveness
TaARFA1f-B	CAAT-box	CAAT	150	4	-	Nicotiana glutinosa
TaARFA1f-B	CAAT-box	CAAT	185	4	-	Nicotiana glutinosa
TaARFA1f-B	CAAT-box	CAAT	315	4	+	Nicotiana glutinosa
TaARFA1f-B	CAAT-box	CAAAT	515	5	-	Pisum sativum	common cis-acting element in promoter and enhancer regions
TaARFA1f-B	CAAT-box	AGCTCAATTTCA	541	11	-	Daucus carota	common cis-acting element in promoter and enhancer regions
TaARFA1f-B	CAAT-box	CAAT	545	4	-	Nicotiana glutinosa
TaARFA1f-B	CAAT-box	CAAAT	584	5	-	Pisum sativum	common cis-acting element in promoter and enhancer regions
TaARFA1f-B	CAAT-box	CCAAT	623	5	+	Arabidopsis thaliana	common cis-acting element in promoter and enhancer regions
TaARFA1f-B	CAAT-box	CAAT	624	4	+	Nicotiana glutinosa
TaARFA1f-B	CAAT-box	CAAT	825	4	-	Nicotiana glutinosa
TaARFA1f-B	CAAT-box	CAAAT	967	5	-	Pisum sativum	common cis-acting element in promoter and enhancer regions
TaARFA1f-B	CAAT-box	CAAT	986	4	-	Nicotiana glutinosa
TaARFA1f-B	CAAT-box	CAAT	1018	4	-	Nicotiana glutinosa
TaARFA1f-B	CAAT-box	CAAT	1051	4	-	Nicotiana glutinosa
TaARFA1f-B	CAAT-box	CAAAT	1062	5	-	Pisum sativum	common cis-acting element in promoter and enhancer regions
TaARFA1f-B	CAAT-box	CAAT	1083	4	-	Nicotiana glutinosa
TaARFA1f-B	CAAT-box	CAAT	1094	4	+	Nicotiana glutinosa
TaARFA1f-B	I-box	gGATAAGGTG	1098	9	+	Zea mays	part of a light responsive element
TaARFA1f-B	I-box	gGATAAGGTG	1254	9	-	Zea mays	part of a light responsive element
TaARFA1f-B	CGTCA-motif	CGTCA	355	5	-	Hordeum vulgare	cis-acting regulatory element involved in the MeJA-responsiveness
TaARFA1f-B	CGTCA-motif	CGTCA	497	5	-	Hordeum vulgare	cis-acting regulatory element involved in the MeJA-responsiveness
TaARFA1f-B	CGTCA-motif	CGTCA	627	5	-	Hordeum vulgare	cis-acting regulatory element involved in the MeJA-responsiveness
TaARFA1f-B	G-box	TACGTG	298	6	-	Arabidopsis thaliana	cis-acting regulatory element involved in light responsiveness
TaARFA1f-B	G-box	CACGTC	356	6	-	Zea mays	cis-acting regulatory element involved in light responsiveness
TaARFA1f-B	G-box	TAACACGTAG	800	9	+	Brassica oleracea	cis-acting regulatory element involved in light responsiveness
TaARFA1f-B	ARE	AAACCA	772	6	+	Zea mays	cis-acting regulatory element essential for the anaerobic induction
TaARFA1f-B	ABRE	GACACGTGGC	296	9	-	Triticum aestivum	cis-acting element involved in the abscisic acid responsiveness
TaARFA1f-B	ABRE	ACGTG	298	5	-	Arabidopsis thaliana	cis-acting element involved in the abscisic acid responsiveness
TaARFA1f-B	ABRE	ACGTG	357	5	+	Arabidopsis thaliana	cis-acting element involved in the abscisic acid responsiveness
TaARFA1f-B	ABRE	AACCCGG	412	7	-	Arabidopsis thaliana	cis-acting element involved in the abscisic acid responsiveness
TaARFA1f-B	P-box	CCTTTTG	973	7	-	Oryza sativa	gibberellin-responsive element
TaARFA1f-B	TATA-box	TATA	90	4	+	Arabidopsis thaliana	core promoter element around -30 of transcription start
TaARFA1f-B	TATA-box	TATA	893	4	-	Arabidopsis thaliana	core promoter element around -30 of transcription start
TaARFA1f-B	TATA-box	TATA	900	4	-	Arabidopsis thaliana	core promoter element around -30 of transcription start
TaARFA1f-B	Sp1	GGGCGG	1249	6	-	Oryza sativa	light responsive element
TaARFA1f-D	CAT-box	GCCACT	392	6	-	Arabidopsis thaliana	cis-acting regulatory element related to meristem expression
TaARFA1f-D	CAT-box	GCCACT	644	6	-	Arabidopsis thaliana	cis-acting regulatory element related to meristem expression
TaARFA1f-D	CAT-box	GCCACT	1094	6	+	Arabidopsis thaliana	cis-acting regulatory element related to meristem expression
TaARFA1f-D	I-box	gGATAAGGTG	981	9	+	Zea mays	part of a light responsive element
TaARFA1f-D	I-box	gGATAAGGTG	1137	9	-	Zea mays	part of a light responsive element
TaARFA1f-D	CGTCA-motif	CGTCA	435	5	-	Hordeum vulgare	cis-acting regulatory element involved in the MeJA-responsiveness
TaARFA1f-D	CGTCA-motif	CGTCA	566	5	-	Hordeum vulgare	cis-acting regulatory element involved in the MeJA-responsiveness
TaARFA1f-D	CAAT-box	CAAT	27	4	+	Nicotiana glutinosa
TaARFA1f-D	CAAT-box	CAAAT	227	5	-	Pisum sativum	common cis-acting element in promoter and enhancer regions
TaARFA1f-D	CAAT-box	CAAT	255	4	+	Nicotiana glutinosa
TaARFA1f-D	CAAT-box	CAAAT	276	5	+	Pisum sativum	common cis-acting element in promoter and enhancer regions
TaARFA1f-D	CAAT-box	CAAT	293	4	-	Nicotiana glutinosa
TaARFA1f-D	CAAT-box	CAAAT	453	5	-	Pisum sativum	common cis-acting element in promoter and enhancer regions
TaARFA1f-D	CAAT-box	CAAT	483	4	-	Nicotiana glutinosa
TaARFA1f-D	CAAT-box	CAAAT	523	5	-	Pisum sativum	common cis-acting element in promoter and enhancer regions
TaARFA1f-D	CAAT-box	CAAT	652	4	+	Nicotiana glutinosa
TaARFA1f-D	CAAT-box	CAAT	721	4	-	Nicotiana glutinosa
TaARFA1f-D	CAAT-box	CAAAT	856	5	-	Pisum sativum	common cis-acting element in promoter and enhancer regions
TaARFA1f-D	CAAT-box	CAAT	877	4	-	Nicotiana glutinosa
TaARFA1f-D	CAAT-box	CAAT	909	4	-	Nicotiana glutinosa
TaARFA1f-D	CAAT-box	CAAT	966	4	-	Nicotiana glutinosa
TaARFA1f-D	CAAT-box	CAAT	977	4	+	Nicotiana glutinosa
TaARFA1f-D	CAAT-box	CCAAT	1165	5	+	Arabidopsis thaliana	common cis-acting element in promoter and enhancer regions
TaARFA1f-D	CAAT-box	CAAT	1166	4	+	Nicotiana glutinosa
TaARFA1f-D	G-Box	CACGTT	634	6	+	Pisum sativum	cis-acting regulatory element involved in light responsiveness
TaARFA1f-D	A-box	CCGTCC	41	6	+	Petroselinum crispum	cis-acting regulatory element
TaARFA1f-D	A-box	CCGTCC	1277	6	+	Petroselinum crispum	cis-acting regulatory element
TaARFA1f-D	AuxRR-core	GGTCCAT	737	7	-	Nicotiana tabacum	cis-acting regulatory element involved in auxin responsiveness
TaARFA1f-D	TGACG-motif	TGACG	435	5	+	Hordeum vulgare	cis-acting regulatory element involved in the MeJA-responsiveness
TaARFA1f-D	TGACG-motif	TGACG	566	5	+	Hordeum vulgare	cis-acting regulatory element involved in the MeJA-responsiveness
TaARFA1f-D	MBS	CAACTG	127	6	-	Arabidopsis thaliana	MYB binding site involved in drought-inducibility
TaARFA1f-D	MBS	CAACTG	320	6	-	Arabidopsis thaliana	MYB binding site involved in drought-inducibility
TaARFA1f-D	Sp1	GGGCGG	106	6	-	Oryza sativa	light responsive element
TaARFA1f-D	Sp1	GGGCGG	1132	6	-	Oryza sativa	light responsive element
TaARFA1f-D	ABRE	ACGTG	634	5	-	Arabidopsis thaliana	cis-acting element involved in the abscisic acid responsiveness
TaARFA1f-D	ARE	AAACCA	668	6	+	Zea mays	cis-acting regulatory element essential for the anaerobic induction
TaARFA1f-D	TATA-box	TATA	517	4	+	Arabidopsis thaliana	core promoter element around -30 of transcription start
TaARFA1f-D	TATA-box	ATATAT	782	6	-	Brassica napus	core promoter element around -30 of transcription start
TaARFA1f-D	TATA-box	TATA	783	4	-	Arabidopsis thaliana	core promoter element around -30 of transcription start
TaARFA1f-D	TATA-box	TATA	790	4	-	Arabidopsis thaliana	core promoter element around -30 of transcription start
TaARFB1a-A	G-Box	CACGTG	1000	6	-	Pisum sativum	cis-acting regulatory element involved in light responsiveness
TaARFB1a-A	TGA-element	AACGAC	1495	6	-	Brassica oleracea	auxin-responsive element
TaARFB1a-A	MBS	CAACTG	379	6	-	Arabidopsis thaliana	MYB binding site involved in drought-inducibility
TaARFB1a-A	MBS	CAACTG	1439	6	-	Arabidopsis thaliana	MYB binding site involved in drought-inducibility
TaARFB1a-A	Box 4	ATTAAT	853	6	-	Petroselinum crispum	part of a conserved DNA module involved in light responsiveness
TaARFB1a-A	CAAT-box	CAAAT	3	5	-	Pisum sativum	common cis-acting element in promoter and enhancer regions
TaARFB1a-A	CAAT-box	CAAT	59	4	-	Nicotiana glutinosa
TaARFB1a-A	CAAT-box	CAAAT	150	5	-	Pisum sativum	common cis-acting element in promoter and enhancer regions
TaARFB1a-A	CAAT-box	CAAT	195	4	-	Nicotiana glutinosa
TaARFB1a-A	CAAT-box	CAAAT	229	5	-	Pisum sativum	common cis-acting element in promoter and enhancer regions
TaARFB1a-A	CAAT-box	CCAAT	236	5	-	Arabidopsis thaliana	common cis-acting element in promoter and enhancer regions
TaARFB1a-A	CAAT-box	CAAAT	251	5	-	Pisum sativum	common cis-acting element in promoter and enhancer regions
TaARFB1a-A	CAAT-box	CAAT	269	4	-	Nicotiana glutinosa
TaARFB1a-A	CAAT-box	CAAT	622	4	+	Nicotiana glutinosa
TaARFB1a-A	CAAT-box	CCAAT	636	5	+	Arabidopsis thaliana	common cis-acting element in promoter and enhancer regions
TaARFB1a-A	CAAT-box	CAAT	637	4	+	Nicotiana glutinosa
TaARFB1a-A	CAAT-box	CAAT	657	4	+	Nicotiana glutinosa
TaARFB1a-A	CAAT-box	CAAT	683	4	-	Nicotiana glutinosa
TaARFB1a-A	CAAT-box	CAAT	709	4	-	Nicotiana glutinosa
TaARFB1a-A	CAAT-box	CAAT	770	4	-	Nicotiana glutinosa
TaARFB1a-A	CAAT-box	CAAAT	886	5	-	Pisum sativum	common cis-acting element in promoter and enhancer regions
TaARFB1a-A	CAAT-box	CAAT	932	4	+	Nicotiana glutinosa
TaARFB1a-A	CAAT-box	CAAAT	950	5	+	Pisum sativum	common cis-acting element in promoter and enhancer regions
TaARFB1a-A	CAAT-box	CAAT	1163	4	+	Nicotiana glutinosa
TaARFB1a-A	CAAT-box	CCAAT	1185	5	-	Arabidopsis thaliana	common cis-acting element in promoter and enhancer regions
TaARFB1a-A	CAAT-box	CCAAT	1235	5	-	Arabidopsis thaliana	common cis-acting element in promoter and enhancer regions
TaARFB1a-A	CAAT-box	CAAAT	1301	5	-	Pisum sativum	common cis-acting element in promoter and enhancer regions
TaARFB1a-A	CAAT-box	CAAAT	1361	5	+	Pisum sativum	common cis-acting element in promoter and enhancer regions
TaARFB1a-A	ARE	AAACCA	70	6	-	Zea mays	cis-acting regulatory element essential for the anaerobic induction
TaARFB1a-A	ARE	AAACCA	1124	6	-	Zea mays	cis-acting regulatory element essential for the anaerobic induction
TaARFB1a-A	G-box	CACGAC	345	6	+	Zea mays	cis-acting regulatory element involved in light responsiveness
TaARFB1a-A	G-box	CACGTG	1000	6	-	Arabidopsis thaliana	cis-acting regulatory element involved in light responsiveness
TaARFB1a-A	ABRE	CACGTG	1000	6	-	Arabidopsis thaliana	cis-acting element involved in the abscisic acid responsiveness
TaARFB1a-A	ABRE	ACGTG	1001	5	+	Arabidopsis thaliana	cis-acting element involved in the abscisic acid responsiveness
TaARFB1a-A	TATA-box	TATATA	304	6	+	Arabidopsis thaliana	core promoter element around -30 of transcription start
TaARFB1a-A	TATA-box	ATATAA	305	6	+	Brassica oleracea	core promoter element around -30 of transcription start
TaARFB1a-A	TATA-box	TATA	306	4	+	Arabidopsis thaliana	core promoter element around -30 of transcription start
TaARFB1a-A	TATA-box	ATTATA	1199	6	+	Brassica napus	core promoter element around -30 of transcription start
TaARFB1a-A	TATA-box	TATAA	1200	5	-	Arabidopsis thaliana	core promoter element around -30 of transcription start
TaARFB1a-A	TATA-box	TATA	1201	4	-	Arabidopsis thaliana	core promoter element around -30 of transcription start
TaARFB1a-A	TATA-box	TACATAAA	1203	8	+	Oryza sativa	core promoter element around -30 of transcription start
TaARFB1a-A	TATA-box	ATATAT	1265	6	-	Brassica napus	core promoter element around -30 of transcription start
TaARFB1a-A	TATA-box	TATATA	1266	6	-	Arabidopsis thaliana	core promoter element around -30 of transcription start
TaARFB1a-A	TATA-box	TATA	1268	4	-	Arabidopsis thaliana	core promoter element around -30 of transcription start
TaARFB1a-B	TATA-box	ccTATAAAaa	330	9	-	Arabidopsis thaliana	core promoter element around -30 of transcription start
TaARFB1a-B	TATA-box	TATAAAA	331	7	-	Pisum sativum	core promoter element around -30 of transcription start
TaARFB1a-B	TATA-box	TATAAA	332	6	-	Helianthus annuus	core promoter element around -30 of transcription start
TaARFB1a-B	TATA-box	TATAA	333	5	-	Arabidopsis thaliana	core promoter element around -30 of transcription start
TaARFB1a-B	TATA-box	TATA	334	4	+	Arabidopsis thaliana	core promoter element around -30 of transcription start
TaARFB1a-B	TATA-box	ATATAT	628	6	+	Brassica napus	core promoter element around -30 of transcription start
TaARFB1a-B	TATA-box	TATA	629	4	+	Arabidopsis thaliana	core promoter element around -30 of transcription start
TaARFB1a-B	ABRE	ACGTG	520	5	-	Arabidopsis thaliana	cis-acting element involved in the abscisic acid responsiveness
TaARFB1a-B	ABRE	ACGTG	568	5	-	Arabidopsis thaliana	cis-acting element involved in the abscisic acid responsiveness
TaARFB1a-B	ABRE	ACGTG	1306	5	-	Arabidopsis thaliana	cis-acting element involved in the abscisic acid responsiveness
TaARFB1a-B	ABRE	ACGTG	1315	5	+	Arabidopsis thaliana	cis-acting element involved in the abscisic acid responsiveness
TaARFB1a-B	ABRE	ACGTG	1481	5	-	Arabidopsis thaliana	cis-acting element involved in the abscisic acid responsiveness
TaARFB1a-B	ARE	AAACCA	592	6	-	Zea mays	cis-acting regulatory element essential for the anaerobic induction
TaARFB1a-B	ARE	AAACCA	1262	6	-	Zea mays	cis-acting regulatory element essential for the anaerobic induction
TaARFB1a-B	G-box	CACGAC	385	6	-	Zea mays	cis-acting regulatory element involved in light responsiveness
TaARFB1a-B	G-box	TACGTG	520	6	-	Arabidopsis thaliana	cis-acting regulatory element involved in light responsiveness
TaARFB1a-B	G-box	CACGAC	667	6	+	Zea mays	cis-acting regulatory element involved in light responsiveness
TaARFB1a-B	G-box	CACGTC	1306	6	+	Zea mays	cis-acting regulatory element involved in light responsiveness
TaARFB1a-B	G-box	CCACGTAA	1480	8	+	Brassica napus	cis-acting regulatory element involved in light responsiveness
TaARFB1a-B	G-box	TACGTG	1481	6	-	Arabidopsis thaliana	cis-acting regulatory element involved in light responsiveness
TaARFB1a-B	LTR	CCGAAA	544	6	-	Hordeum vulgare	cis-acting element involved in low-temperature responsiveness
TaARFB1a-B	I-box	AAGATAAGGCT	1373	10	-	Gossypium hirsutum	part of a light responsive element
TaARFB1a-B	CGTCA-motif	CGTCA	172	5	+	Hordeum vulgare	cis-acting regulatory element involved in the MeJA-responsiveness
TaARFB1a-B	CAAT-box	CAAAT	40	5	+	Pisum sativum	common cis-acting element in promoter and enhancer regions
TaARFB1a-B	CAAT-box	CAAAT	288	5	+	Pisum sativum	common cis-acting element in promoter and enhancer regions
TaARFB1a-B	CAAT-box	CAAAT	312	5	+	Pisum sativum	common cis-acting element in promoter and enhancer regions
TaARFB1a-B	CAAT-box	CAAT	392	4	-	Nicotiana glutinosa
TaARFB1a-B	CAAT-box	CAAAT	398	5	+	Pisum sativum	common cis-acting element in promoter and enhancer regions
TaARFB1a-B	CAAT-box	CAAT	401	4	-	Nicotiana glutinosa
TaARFB1a-B	CAAT-box	CCAAT	590	5	-	Arabidopsis thaliana	common cis-acting element in promoter and enhancer regions
TaARFB1a-B	CAAT-box	CAAT	620	4	-	Nicotiana glutinosa
TaARFB1a-B	CAAT-box	CCAAT	958	5	+	Arabidopsis thaliana	common cis-acting element in promoter and enhancer regions
TaARFB1a-B	CAAT-box	CAAT	959	4	+	Nicotiana glutinosa
TaARFB1a-B	CAAT-box	CAAT	979	4	+	Nicotiana glutinosa
TaARFB1a-B	CAAT-box	CCAAT	984	5	-	Arabidopsis thaliana	common cis-acting element in promoter and enhancer regions
TaARFB1a-B	CAAT-box	CAAT	1007	4	-	Nicotiana glutinosa
TaARFB1a-B	CAAT-box	CAAAT	1039	5	+	Pisum sativum	common cis-acting element in promoter and enhancer regions
TaARFB1a-B	CAAT-box	CAAT	1090	4	-	Nicotiana glutinosa
TaARFB1a-B	CAAT-box	CAAAT	1096	5	+	Pisum sativum	common cis-acting element in promoter and enhancer regions
TaARFB1a-B	CAAT-box	CAAT	1165	4	-	Nicotiana glutinosa
TaARFB1a-B	CAAT-box	CAAT	1269	4	-	Nicotiana glutinosa
TaARFB1a-B	CAAT-box	CCAAT	1324	5	-	Arabidopsis thaliana	common cis-acting element in promoter and enhancer regions
TaARFB1a-B	CAT-box	GCCACT	26	6	+	Arabidopsis thaliana	cis-acting regulatory element related to meristem expression
TaARFB1a-B	Box 4	ATTAAT	1173	6	-	Petroselinum crispum	part of a conserved DNA module involved in light responsiveness
TaARFB1a-B	TGACG-motif	TGACG	172	5	-	Hordeum vulgare	cis-acting regulatory element involved in the MeJA-responsiveness
TaARFB1a-B	MBS	CAACTG	1336	6	+	Arabidopsis thaliana	MYB binding site involved in drought-inducibility
TaARFB1a-B	G-Box	CACGTT	568	6	+	Pisum sativum	cis-acting regulatory element involved in light responsiveness
TaARFB1a-B	G-Box	CACGTT	1314	6	-	Pisum sativum	cis-acting regulatory element involved in light responsiveness
TaARFB1a-B	A-box	CCGTCC	166	6	+	Petroselinum crispum	cis-acting regulatory element
TaARFB1a-B	A-box	CCGTCC	722	6	-	Petroselinum crispum	cis-acting regulatory element
TaARFB1a-D	ABRE	CACGTG	1311	6	-	Arabidopsis thaliana	cis-acting element involved in the abscisic acid responsiveness
TaARFB1a-D	ABRE	ACGTG	1312	5	+	Arabidopsis thaliana	cis-acting element involved in the abscisic acid responsiveness
TaARFB1a-D	ABRE	ACGTG	1469	5	-	Arabidopsis thaliana	cis-acting element involved in the abscisic acid responsiveness
TaARFB1a-D	G-box	CACGTG	1311	6	-	Arabidopsis thaliana	cis-acting regulatory element involved in light responsiveness
TaARFB1a-D	G-box	CCACGTAA	1468	8	+	Brassica napus	cis-acting regulatory element involved in light responsiveness
TaARFB1a-D	G-box	TACGTG	1469	6	-	Arabidopsis thaliana	cis-acting regulatory element involved in light responsiveness
TaARFB1a-D	ARE	AAACCA	687	6	+	Zea mays	cis-acting regulatory element essential for the anaerobic induction
TaARFB1a-D	ARE	AAACCA	1211	6	-	Zea mays	cis-acting regulatory element essential for the anaerobic induction
TaARFB1a-D	TATA-box	TATA	416	4	+	Arabidopsis thaliana	core promoter element around -30 of transcription start
TaARFB1a-D	TATA-box	ccTATAAAaa	572	9	+	Arabidopsis thaliana	core promoter element around -30 of transcription start
TaARFB1a-D	TATA-box	ATATAT	666	6	+	Brassica napus	core promoter element around -30 of transcription start
TaARFB1a-D	TATA-box	TATA	667	4	+	Arabidopsis thaliana	core promoter element around -30 of transcription start
TaARFB1a-D	TATA-box	ccTATAAAaa	1147	9	-	Arabidopsis thaliana	core promoter element around -30 of transcription start
TaARFB1a-D	TATA-box	ATATAA	1352	6	+	Brassica oleracea	core promoter element around -30 of transcription start
TaARFB1a-D	TATA-box	TATA	1353	4	-	Arabidopsis thaliana	core promoter element around -30 of transcription start
TaARFB1a-D	G-Box	CACGTG	1311	6	-	Pisum sativum	cis-acting regulatory element involved in light responsiveness
TaARFB1a-D	A-box	CCGTCC	426	6	+	Petroselinum crispum	cis-acting regulatory element
TaARFB1a-D	A-box	CCGTCC	501	6	-	Petroselinum crispum	cis-acting regulatory element
TaARFB1a-D	CAT-box	GCCACT	275	6	-	Arabidopsis thaliana	cis-acting regulatory element related to meristem expression
TaARFB1a-D	CAT-box	GCCACT	645	6	+	Arabidopsis thaliana	cis-acting regulatory element related to meristem expression
TaARFB1a-D	I-box	AGATAAGG	601	8	+	Triticum aestivum	part of a light responsive element
TaARFB1a-D	CAAT-box	CAAAT	158	5	-	Pisum sativum	common cis-acting element in promoter and enhancer regions
TaARFB1a-D	CAAT-box	CCAAT	307	5	-	Arabidopsis thaliana	common cis-acting element in promoter and enhancer regions
TaARFB1a-D	CAAT-box	CAAAT	351	5	-	Pisum sativum	common cis-acting element in promoter and enhancer regions
TaARFB1a-D	CAAT-box	CAAT	374	4	+	Nicotiana glutinosa
TaARFB1a-D	CAAT-box	CAAAT	389	5	-	Pisum sativum	common cis-acting element in promoter and enhancer regions
TaARFB1a-D	CAAT-box	CAACCAACTCC	509	10	-	Arabidopsis thaliana	common cis-acting element in promoter and enhancer regions
TaARFB1a-D	CAAT-box	CAAAT	535	5	+	Pisum sativum	common cis-acting element in promoter and enhancer regions
TaARFB1a-D	CAAT-box	CCAAT	572	5	+	Arabidopsis thaliana	common cis-acting element in promoter and enhancer regions
TaARFB1a-D	CAAT-box	CAAT	573	4	+	Nicotiana glutinosa
TaARFB1a-D	CAAT-box	CCAAT	586	5	-	Arabidopsis thaliana	common cis-acting element in promoter and enhancer regions
TaARFB1a-D	CAAT-box	CCAAT	592	5	-	Arabidopsis thaliana	common cis-acting element in promoter and enhancer regions
TaARFB1a-D	CAAT-box	CAAAT	709	5	+	Pisum sativum	common cis-acting element in promoter and enhancer regions
TaARFB1a-D	CAAT-box	CAAT	719	4	+	Nicotiana glutinosa
TaARFB1a-D	CAAT-box	CCAAT	831	5	-	Arabidopsis thaliana	common cis-acting element in promoter and enhancer regions
TaARFB1a-D	CAAT-box	CAAAT	974	5	-	Pisum sativum	common cis-acting element in promoter and enhancer regions
TaARFB1a-D	CAAT-box	CCAAT	1044	5	-	Arabidopsis thaliana	common cis-acting element in promoter and enhancer regions
TaARFB1b-A	TGACG-motif	TGACG	753	5	+	Hordeum vulgare	cis-acting regulatory element involved in the MeJA-responsiveness
TaARFB1b-A	TGA-element	AACGAC	1437	6	+	Brassica oleracea	auxin-responsive element
TaARFB1b-A	CAAT-box	CAAT	191	4	+	Nicotiana glutinosa
TaARFB1b-A	CAAT-box	CAAT	258	4	-	Nicotiana glutinosa
TaARFB1b-A	CAAT-box	CAAAT	314	5	+	Pisum sativum	common cis-acting element in promoter and enhancer regions
TaARFB1b-A	CAAT-box	CAAT	377	4	+	Nicotiana glutinosa
TaARFB1b-A	CAAT-box	CAAAT	379	5	-	Pisum sativum	common cis-acting element in promoter and enhancer regions
TaARFB1b-A	CAAT-box	CAAAT	389	5	+	Pisum sativum	common cis-acting element in promoter and enhancer regions
TaARFB1b-A	CAAT-box	CAAT	463	4	-	Nicotiana glutinosa
TaARFB1b-A	CAAT-box	CCAAT	546	5	+	Arabidopsis thaliana	common cis-acting element in promoter and enhancer regions
TaARFB1b-A	CAAT-box	CAAT	547	4	+	Nicotiana glutinosa
TaARFB1b-A	CAAT-box	CAAT	656	4	+	Nicotiana glutinosa
TaARFB1b-A	CAAT-box	CAAT	770	4	-	Nicotiana glutinosa
TaARFB1b-A	CAAT-box	CAAAT	839	5	-	Pisum sativum	common cis-acting element in promoter and enhancer regions
TaARFB1b-A	CAAT-box	CAAT	881	4	+	Nicotiana glutinosa
TaARFB1b-A	CAAT-box	CAAT	1189	4	+	Nicotiana glutinosa
TaARFB1b-A	CAAT-box	CAAT	1252	4	+	Nicotiana glutinosa
TaARFB1b-A	CAAT-box	CCAAT	1300	5	+	Arabidopsis thaliana	common cis-acting element in promoter and enhancer regions
TaARFB1b-A	CAAT-box	CAAT	1301	4	+	Nicotiana glutinosa
TaARFB1b-A	CAAT-box	CAAAT	1451	5	+	Pisum sativum	common cis-acting element in promoter and enhancer regions
TaARFB1b-A	CAAT-box	CAAT	1457	4	+	Nicotiana glutinosa
TaARFB1b-A	LTR	CCGAAA	468	6	-	Hordeum vulgare	cis-acting element involved in low-temperature responsiveness
TaARFB1b-A	LTR	CCGAAA	791	6	-	Hordeum vulgare	cis-acting element involved in low-temperature responsiveness
TaARFB1b-A	CGTCA-motif	CGTCA	753	5	-	Hordeum vulgare	cis-acting regulatory element involved in the MeJA-responsiveness
TaARFB1b-A	CAT-box	GCCACT	56	6	-	Arabidopsis thaliana	cis-acting regulatory element related to meristem expression
TaARFB1b-A	P-box	CCTTTTG	555	7	+	Oryza sativa	gibberellin-responsive element
TaARFB1b-A	TATA-box	ccTATAAAaa	444	9	+	Arabidopsis thaliana	core promoter element around -30 of transcription start
TaARFB1b-A	TATA-box	TATA	646	4	+	Arabidopsis thaliana	core promoter element around -30 of transcription start
TaARFB1b-A	TATA-box	TATATA	1316	6	-	Arabidopsis thaliana	core promoter element around -30 of transcription start
TaARFB1b-A	TATA-box	ATATAT	1317	6	-	Brassica napus	core promoter element around -30 of transcription start
TaARFB1b-A	TATA-box	TATA	1318	4	-	Arabidopsis thaliana	core promoter element around -30 of transcription start
TaARFB1b-A	TATA-box	ATATAA	1338	6	+	Brassica oleracea	core promoter element around -30 of transcription start
TaARFB1b-A	TATA-box	TATA	1339	4	-	Arabidopsis thaliana	core promoter element around -30 of transcription start
TaARFB1b-A	TATA-box	TATA	1363	4	-	Arabidopsis thaliana	core promoter element around -30 of transcription start
TaARFB1b-A	TATA-box	TACATAAA	1382	8	+	Oryza sativa	core promoter element around -30 of transcription start
TaARFB1b-A	TATA-box	TATA	1397	4	-	Arabidopsis thaliana	core promoter element around -30 of transcription start
TaARFB1b-A	TATA-box	TATAA	1426	5	-	Arabidopsis thaliana	core promoter element around -30 of transcription start
TaARFB1b-A	TATA-box	TATA	1427	4	-	Arabidopsis thaliana	core promoter element around -30 of transcription start
TaARFB1b-A	ARE	AAACCA	895	6	+	Zea mays	cis-acting regulatory element essential for the anaerobic induction
TaARFB1b-A	ARE	AAACCA	971	6	+	Zea mays	cis-acting regulatory element essential for the anaerobic induction
TaARFB1b-A	ABRE	GCCGCGTGGC	134	9	-	Oryza sativa	cis-acting element involved in the abscisic acid responsiveness
TaARFB1b-A	ACE	GCGACGTACC	480	9	+	Petroselinum crispum	cis-acting element involved in light responsiveness
TaARFB1b-A	TCA-element	CCATCTTTTT	551	9	+	Nicotiana tabacum	cis-acting element involved in salicylic acid responsiveness
TaARFB1c-A	CAT-box	GCCACT	1143	6	+	Arabidopsis thaliana	cis-acting regulatory element related to meristem expression
TaARFB1c-A	CAAT-box	CCAAT	104	5	-	Arabidopsis thaliana	common cis-acting element in promoter and enhancer regions
TaARFB1c-A	CAAT-box	CAACCAACTCC	130	10	+	Arabidopsis thaliana	common cis-acting element in promoter and enhancer regions
TaARFB1c-A	CAAT-box	CAAT	260	4	+	Nicotiana glutinosa
TaARFB1c-A	CAAT-box	CAAT	262	4	-	Nicotiana glutinosa
TaARFB1c-A	CAAT-box	CAAAT	517	5	+	Pisum sativum	common cis-acting element in promoter and enhancer regions
TaARFB1c-A	CAAT-box	CCAAT	582	5	+	Arabidopsis thaliana	common cis-acting element in promoter and enhancer regions
TaARFB1c-A	CAAT-box	CAAT	583	4	+	Nicotiana glutinosa
TaARFB1c-A	CAAT-box	CAAAT	833	5	-	Pisum sativum	common cis-acting element in promoter and enhancer regions
TaARFB1c-A	CAAT-box	CAAAT	1131	5	-	Pisum sativum	common cis-acting element in promoter and enhancer regions
TaARFB1c-A	CAAT-box	TGCCAAC	1205	7	-	Petunia hybrida	common cis-acting element in promoter and enhancer regions
TaARFB1c-A	CAAT-box	CAAAT	1227	5	+	Pisum sativum	common cis-acting element in promoter and enhancer regions
TaARFB1c-A	CAAT-box	CAAT	1245	4	+	Nicotiana glutinosa
TaARFB1c-A	LTR	CCGAAA	626	6	+	Hordeum vulgare	cis-acting element involved in low-temperature responsiveness
TaARFB1c-A	GARE-motif	TCTGTTG	1336	7	-	Brassica oleracea	gibberellin-responsive element
TaARFB1c-A	A-box	CCGTCC	1044	6	-	Petroselinum crispum	cis-acting regulatory element
TaARFB1c-A	A-box	CCGTCC	1440	6	-	Petroselinum crispum	cis-acting regulatory element
TaARFB1c-A	G-Box	CACGTT	1423	6	+	Pisum sativum	cis-acting regulatory element involved in light responsiveness
TaARFB1c-A	MBS	CAACTG	47	6	+	Arabidopsis thaliana	MYB binding site involved in drought-inducibility
TaARFB1c-A	MBS	CAACTG	68	6	+	Arabidopsis thaliana	MYB binding site involved in drought-inducibility
TaARFB1c-A	MBS	CAACTG	111	6	+	Arabidopsis thaliana	MYB binding site involved in drought-inducibility
TaARFB1c-A	MBS	CAACTG	155	6	+	Arabidopsis thaliana	MYB binding site involved in drought-inducibility
TaARFB1c-A	MBS	CAACTG	175	6	+	Arabidopsis thaliana	MYB binding site involved in drought-inducibility
TaARFB1c-A	Sp1	GGGCGG	876	6	+	Oryza sativa	light responsive element
TaARFB1c-A	Sp1	GGGCGG	961	6	-	Oryza sativa	light responsive element
TaARFB1c-A	Sp1	GGGCGG	1024	6	-	Oryza sativa	light responsive element
TaARFB1c-A	Sp1	GGGCGG	1116	6	-	Oryza sativa	light responsive element
TaARFB1c-A	ARE	AAACCA	336	6	+	Zea mays	cis-acting regulatory element essential for the anaerobic induction
TaARFB1c-A	G-box	CACGAC	1029	6	+	Zea mays	cis-acting regulatory element involved in light responsiveness
TaARFB1c-A	ABRE	ACGTG	1423	5	-	Arabidopsis thaliana	cis-acting element involved in the abscisic acid responsiveness
TaARFB1c-A	GC-motif	CCCCCG	1074	6	+	Zea mays	enhancer-like element involved in anoxic specific inducibility
TaARFB1c-A	GC-motif	CCCCCG	1411	6	+	Zea mays	enhancer-like element involved in anoxic specific inducibility
TaARFB1c-A	TATA-box	TATA	15	4	+	Arabidopsis thaliana	core promoter element around -30 of transcription start
TaARFB1c-A	TATA-box	TATA	141	4	+	Arabidopsis thaliana	core promoter element around -30 of transcription start
TaARFB1c-A	TATA-box	ccTATAAAaa	1166	9	-	Arabidopsis thaliana	core promoter element around -30 of transcription start
TaARFB1c-A	TATA-box	ccTATAAAaa	1185	9	-	Arabidopsis thaliana	core promoter element around -30 of transcription start
TaARFB1c-B	Box 4	ATTAAT	982	6	-	Petroselinum crispum	part of a conserved DNA module involved in light responsiveness
TaARFB1c-B	A-box	CCGTCC	231	6	-	Petroselinum crispum	cis-acting regulatory element
TaARFB1c-B	CCAAT-box	CAACGG	1385	6	+	Hordeum vulgare	MYBHv1 binding site
TaARFB1c-B	CAAT-box	CAAT	36	4	+	Nicotiana glutinosa
TaARFB1c-B	CAAT-box	CAAT	60	4	+	Nicotiana glutinosa
TaARFB1c-B	CAAT-box	CAAT	66	4	+	Nicotiana glutinosa
TaARFB1c-B	CAAT-box	CAAAT	75	5	+	Pisum sativum	common cis-acting element in promoter and enhancer regions
TaARFB1c-B	CAAT-box	CAAT	110	4	+	Nicotiana glutinosa
TaARFB1c-B	CAAT-box	CAAT	174	4	+	Nicotiana glutinosa
TaARFB1c-B	CAAT-box	CAAT	208	4	-	Nicotiana glutinosa
TaARFB1c-B	CAAT-box	CAAT	312	4	-	Nicotiana glutinosa
TaARFB1c-B	CAAT-box	CAAAT	372	5	+	Pisum sativum	common cis-acting element in promoter and enhancer regions
TaARFB1c-B	CAAT-box	CAAAT	453	5	+	Pisum sativum	common cis-acting element in promoter and enhancer regions
TaARFB1c-B	CAAT-box	CCAAT	541	5	+	Arabidopsis thaliana	common cis-acting element in promoter and enhancer regions
TaARFB1c-B	CAAT-box	CAAT	542	4	+	Nicotiana glutinosa
TaARFB1c-B	CAAT-box	CAAT	697	4	+	Nicotiana glutinosa
TaARFB1c-B	CAAT-box	CAAT	769	4	-	Nicotiana glutinosa
TaARFB1c-B	CAAT-box	CAAT	872	4	+	Nicotiana glutinosa
TaARFB1c-B	CAAT-box	CAAAT	948	5	-	Pisum sativum	common cis-acting element in promoter and enhancer regions
TaARFB1c-B	CAAT-box	CAAT	1248	4	-	Nicotiana glutinosa
TaARFB1c-B	CAAT-box	CAAAT	1367	5	+	Pisum sativum	common cis-acting element in promoter and enhancer regions
TaARFB1c-B	LTR	CCGAAA	514	6	+	Hordeum vulgare	cis-acting element involved in low-temperature responsiveness
TaARFB1c-B	LTR	CCGAAA	1135	6	-	Hordeum vulgare	cis-acting element involved in low-temperature responsiveness
TaARFB1c-B	CAT-box	GCCACT	847	6	-	Arabidopsis thaliana	cis-acting regulatory element related to meristem expression
TaARFB1c-B	P-box	CCTTTTG	918	7	-	Oryza sativa	gibberellin-responsive element
TaARFB1c-B	TCT-motif	TCTTAC	688	6	-	Arabidopsis thaliana	part of a light responsive element
TaARFB1c-B	TATA-box	TATA	90	4	+	Arabidopsis thaliana	core promoter element around -30 of transcription start
TaARFB1c-B	TATA-box	ATATAA	508	6	+	Brassica oleracea	core promoter element around -30 of transcription start
TaARFB1c-B	TATA-box	TATA	509	4	+	Arabidopsis thaliana	core promoter element around -30 of transcription start
TaARFB1c-B	TATA-box	ccTATAAAaa	1322	9	-	Arabidopsis thaliana	core promoter element around -30 of transcription start
TaARFB1c-B	G-box	CACGAC	621	6	+	Zea mays	cis-acting regulatory element involved in light responsiveness
TaARFB1c-B	ABRE	GACACGTGGC	286	9	-	Triticum aestivum	cis-acting element involved in the abscisic acid responsiveness
TaARFB1c-B	ABRE	AACCCGG	1238	7	-	Arabidopsis thaliana	cis-acting element involved in the abscisic acid responsiveness
TaARFB1c-B	TCA-element	TCAGAAGAGG	674	9	+	Brassica oleracea	cis-acting element involved in salicylic acid responsiveness
TaARFB1c-D	TATA-box	ATATAT	108	6	+	Brassica napus	core promoter element around -30 of transcription start
TaARFB1c-D	TATA-box	TATA	109	4	+	Arabidopsis thaliana	core promoter element around -30 of transcription start
TaARFB1c-D	TATA-box	TATA	188	4	+	Arabidopsis thaliana	core promoter element around -30 of transcription start
TaARFB1c-D	TATA-box	TATA	225	4	+	Arabidopsis thaliana	core promoter element around -30 of transcription start
TaARFB1c-D	TATA-box	TATACA	631	6	-	Helianthus annuus	core promoter element around -30 of transcription start
TaARFB1c-D	TATA-box	TATA	633	4	+	Arabidopsis thaliana	core promoter element around -30 of transcription start
TaARFB1c-D	TATA-box	ATATAA	667	6	+	Brassica oleracea	core promoter element around -30 of transcription start
TaARFB1c-D	TATA-box	TATA	668	4	+	Arabidopsis thaliana	core promoter element around -30 of transcription start
TaARFB1c-D	TATA-box	TATA	763	4	-	Arabidopsis thaliana	core promoter element around -30 of transcription start
TaARFB1c-D	TATA-box	ATATAT	808	6	-	Brassica napus	core promoter element around -30 of transcription start
TaARFB1c-D	TATA-box	TATATA	809	6	-	Arabidopsis thaliana	core promoter element around -30 of transcription start
TaARFB1c-D	TATA-box	TATA	811	4	-	Arabidopsis thaliana	core promoter element around -30 of transcription start
TaARFB1c-D	TATA-box	TACAAAA	813	7	+	Oryza sativa	core promoter element around -30 of transcription start
TaARFB1c-D	TATA-box	TATA	1221	4	-	Arabidopsis thaliana	core promoter element around -30 of transcription start
TaARFB1c-D	TATA-box	TATA	1444	4	-	Arabidopsis thaliana	core promoter element around -30 of transcription start
TaARFB1c-D	TATA-box	TATAAAA	1494	7	-	Pisum sativum	core promoter element around -30 of transcription start
TaARFB1c-D	TATA-box	TATAAA	1495	6	-	Helianthus annuus	core promoter element around -30 of transcription start
TaARFB1c-D	TATA-box	TATAA	1496	5	-	Arabidopsis thaliana	core promoter element around -30 of transcription start
TaARFB1c-D	TATA-box	TATA	1497	4	-	Arabidopsis thaliana	core promoter element around -30 of transcription start
TaARFB1c-D	ABRE	ACGTG	1263	5	-	Arabidopsis thaliana	cis-acting element involved in the abscisic acid responsiveness
TaARFB1c-D	ABRE	ACGTG	1395	5	-	Arabidopsis thaliana	cis-acting element involved in the abscisic acid responsiveness
TaARFB1c-D	ARE	AAACCA	589	6	-	Zea mays	cis-acting regulatory element essential for the anaerobic induction
TaARFB1c-D	ARE	AAACCA	708	6	-	Zea mays	cis-acting regulatory element essential for the anaerobic induction
TaARFB1c-D	ARE	AAACCA	1031	6	+	Zea mays	cis-acting regulatory element essential for the anaerobic induction
TaARFB1c-D	ARE	AAACCA	1281	6	-	Zea mays	cis-acting regulatory element essential for the anaerobic induction
TaARFB1c-D	G-box	CACGTC	1263	6	+	Zea mays	cis-acting regulatory element involved in light responsiveness
TaARFB1c-D	G-box	CACGTC	1395	6	+	Zea mays	cis-acting regulatory element involved in light responsiveness
TaARFB1c-D	CGTCA-motif	CGTCA	212	5	-	Hordeum vulgare	cis-acting regulatory element involved in the MeJA-responsiveness
TaARFB1c-D	CGTCA-motif	CGTCA	536	5	+	Hordeum vulgare	cis-acting regulatory element involved in the MeJA-responsiveness
TaARFB1c-D	CAAT-box	CAAT	30	4	+	Nicotiana glutinosa
TaARFB1c-D	CAAT-box	CAAT	54	4	+	Nicotiana glutinosa
TaARFB1c-D	CAAT-box	CAAAT	87	5	-	Pisum sativum	common cis-acting element in promoter and enhancer regions
TaARFB1c-D	CAAT-box	CAAT	154	4	-	Nicotiana glutinosa
TaARFB1c-D	CAAT-box	CCAAT	184	5	+	Arabidopsis thaliana	common cis-acting element in promoter and enhancer regions
TaARFB1c-D	CAAT-box	CAAT	185	4	+	Nicotiana glutinosa
TaARFB1c-D	CAAT-box	CCAAT	337	5	-	Arabidopsis thaliana	common cis-acting element in promoter and enhancer regions
TaARFB1c-D	CAAT-box	CCAAT	362	5	-	Arabidopsis thaliana	common cis-acting element in promoter and enhancer regions
TaARFB1c-D	CAAT-box	CAAAT	367	5	-	Pisum sativum	common cis-acting element in promoter and enhancer regions
TaARFB1c-D	CAAT-box	CAAT	420	4	-	Nicotiana glutinosa
TaARFB1c-D	CAAT-box	CAAT	428	4	-	Nicotiana glutinosa
TaARFB1c-D	CAAT-box	CAAAT	447	5	+	Pisum sativum	common cis-acting element in promoter and enhancer regions
TaARFB1c-D	CAAT-box	CAAT	539	4	+	Nicotiana glutinosa
TaARFB1c-D	CAAT-box	CAAT	557	4	-	Nicotiana glutinosa
TaARFB1c-D	CAAT-box	CAAT	642	4	-	Nicotiana glutinosa
TaARFB1c-D	CAAT-box	CAAT	776	4	+	Nicotiana glutinosa
TaARFB1c-D	CAAT-box	CAAT	792	4	-	Nicotiana glutinosa
TaARFB1c-D	CAAT-box	CAAT	829	4	-	Nicotiana glutinosa
TaARFB1c-D	CAAT-box	CAAAT	985	5	-	Pisum sativum	common cis-acting element in promoter and enhancer regions
TaARFB1c-D	CAAT-box	CAAAT	999	5	-	Pisum sativum	common cis-acting element in promoter and enhancer regions
TaARFB1c-D	CAAT-box	CAAT	1005	4	+	Nicotiana glutinosa
TaARFB1c-D	CAAT-box	CCAAT	1196	5	+	Arabidopsis thaliana	common cis-acting element in promoter and enhancer regions
TaARFB1c-D	CAAT-box	CAAT	1197	4	+	Nicotiana glutinosa
TaARFB1c-D	CAAT-box	CAAT	1256	4	+	Nicotiana glutinosa
TaARFB1c-D	Box 4	ATTAAT	659	6	+	Petroselinum crispum	part of a conserved DNA module involved in light responsiveness
TaARFB1c-D	Box 4	ATTAAT	663	6	+	Petroselinum crispum	part of a conserved DNA module involved in light responsiveness
TaARFB1c-D	TGACG-motif	TGACG	212	5	+	Hordeum vulgare	cis-acting regulatory element involved in the MeJA-responsiveness
TaARFB1c-D	TGACG-motif	TGACG	536	5	-	Hordeum vulgare	cis-acting regulatory element involved in the MeJA-responsiveness
TaARFB1d-B	I-box	gGATAAGGTG	587	9	+	Zea mays	part of a light responsive element
TaARFB1d-B	LTR	CCGAAA	480	6	-	Hordeum vulgare	cis-acting element involved in low-temperature responsiveness
TaARFB1d-B	CGTCA-motif	CGTCA	22	5	-	Hordeum vulgare	cis-acting regulatory element involved in the MeJA-responsiveness
TaARFB1d-B	CAAT-box	CAAT	214	4	+	Nicotiana glutinosa
TaARFB1d-B	CAAT-box	CAAT	285	4	-	Nicotiana glutinosa
TaARFB1d-B	CAAT-box	CAAAT	341	5	+	Pisum sativum	common cis-acting element in promoter and enhancer regions
TaARFB1d-B	CAAT-box	CAAT	407	4	+	Nicotiana glutinosa
TaARFB1d-B	CAAT-box	CAAAT	409	5	-	Pisum sativum	common cis-acting element in promoter and enhancer regions
TaARFB1d-B	CAAT-box	CAAAT	419	5	+	Pisum sativum	common cis-acting element in promoter and enhancer regions
TaARFB1d-B	CAAT-box	CCAAT	424	5	+	Arabidopsis thaliana	common cis-acting element in promoter and enhancer regions
TaARFB1d-B	CAAT-box	CAAT	425	4	+	Nicotiana glutinosa
TaARFB1d-B	CAAT-box	CAAT	670	4	+	Nicotiana glutinosa
TaARFB1d-B	CAAT-box	CAAT	784	4	-	Nicotiana glutinosa
TaARFB1d-B	CAAT-box	CAAT	838	4	+	Nicotiana glutinosa
TaARFB1d-B	CAAT-box	CAAT	1143	4	+	Nicotiana glutinosa
TaARFB1d-B	CAAT-box	CAAT	1228	4	+	Nicotiana glutinosa
TaARFB1d-B	CAAT-box	CAAT	1313	4	+	Nicotiana glutinosa
TaARFB1d-B	CAAT-box	CAAAT	1378	5	+	Pisum sativum	common cis-acting element in promoter and enhancer regions
TaARFB1d-B	CAAT-box	CAAAT	1496	5	-	Pisum sativum	common cis-acting element in promoter and enhancer regions
TaARFB1d-B	TGA-element	AACGAC	261	6	-	Brassica oleracea	auxin-responsive element
TaARFB1d-B	TGA-element	AACGAC	1046	6	-	Brassica oleracea	auxin-responsive element
TaARFB1d-B	A-box	CCGTCC	1406	6	+	Petroselinum crispum	cis-acting regulatory element
TaARFB1d-B	TGACG-motif	TGACG	22	5	+	Hordeum vulgare	cis-acting regulatory element involved in the MeJA-responsiveness
TaARFB1d-B	TCA-element	TCAGAAGAGG	814	9	+	Brassica oleracea	cis-acting element involved in salicylic acid responsiveness
TaARFB1d-B	GC-motif	AGCGCGCCG	181	9	+	Oryza sativa	?
TaARFB1d-B	ABRE	GCCGCGTGGC	156	9	-	Oryza sativa	cis-acting element involved in the abscisic acid responsiveness
TaARFB1d-B	ABRE	GCAACGTGTC	510	9	+	Hordeum vulgare	cis-acting element involved in the abscisic acid responsiveness
TaARFB1d-B	ARE	AAACCA	852	6	+	Zea mays	cis-acting regulatory element essential for the anaerobic induction
TaARFB1d-B	TATA-box	TATA	502	4	+	Arabidopsis thaliana	core promoter element around -30 of transcription start
TaARFB1d-B	TATA-box	TATA	660	4	+	Arabidopsis thaliana	core promoter element around -30 of transcription start
TaARFB1d-B	TATA-box	TATATA	1271	6	-	Arabidopsis thaliana	core promoter element around -30 of transcription start
TaARFB1d-B	TATA-box	ATATAT	1272	6	-	Brassica napus	core promoter element around -30 of transcription start
TaARFB1d-B	TATA-box	TATA	1273	4	-	Arabidopsis thaliana	core promoter element around -30 of transcription start
TaARFB1d-B	TATA-box	TATA	1316	4	-	Arabidopsis thaliana	core promoter element around -30 of transcription start
TaARFB1d-B	TATA-box	taTATAAAtc	1331	9	-	Arabidopsis thaliana	core promoter element around -30 of transcription start
TaARFB1d-B	TATA-box	TATACA	1333	6	-	Helianthus annuus	core promoter element around -30 of transcription start
TaARFB1d-B	TATA-box	TATATA	1335	6	-	Arabidopsis thaliana	core promoter element around -30 of transcription start
TaARFB1d-B	TATA-box	ATATAA	1336	6	+	Brassica oleracea	core promoter element around -30 of transcription start
TaARFB1d-B	TATA-box	TATA	1337	4	-	Arabidopsis thaliana	core promoter element around -30 of transcription start
TaARFB1d-B	TATA-box	TATAA	1395	5	-	Arabidopsis thaliana	core promoter element around -30 of transcription start
TaARFB1d-B	TATA-box	TATA	1396	4	-	Arabidopsis thaliana	core promoter element around -30 of transcription start
TaARFB1d-B	P-box	CCTTTTG	1053	7	+	Oryza sativa	gibberellin-responsive element
TaARFC1-A	O2-site	GATGATGTGG	413	9	-	Zea mays	cis-acting regulatory element involved in zein metabolism regulation
TaARFC1-A	O2-site	GATGATGTGG	1352	9	+	Zea mays	cis-acting regulatory element involved in zein metabolism regulation
TaARFC1-A	TCA-element	CCATCTTTTT	1308	9	-	Nicotiana tabacum	cis-acting element involved in salicylic acid responsiveness
TaARFC1-A	Sp1	GGGCGG	150	6	-	Oryza sativa	light responsive element
TaARFC1-A	ABRE	ACGTG	886	5	-	Arabidopsis thaliana	cis-acting element involved in the abscisic acid responsiveness
TaARFC1-A	ABRE	ACGTG	1117	5	-	Arabidopsis thaliana	cis-acting element involved in the abscisic acid responsiveness
TaARFC1-A	ABRE	ACGTG	1356	5	+	Arabidopsis thaliana	cis-acting element involved in the abscisic acid responsiveness
TaARFC1-A	ARE	AAACCA	486	6	+	Zea mays	cis-acting regulatory element essential for the anaerobic induction
TaARFC1-A	ARE	AAACCA	882	6	+	Zea mays	cis-acting regulatory element essential for the anaerobic induction
TaARFC1-A	G-box	CACGTC	886	6	+	Zea mays	cis-acting regulatory element involved in light responsiveness
TaARFC1-A	G-box	CACGAC	950	6	+	Zea mays	cis-acting regulatory element involved in light responsiveness
TaARFC1-A	G-box	TACGTG	1117	6	-	Arabidopsis thaliana	cis-acting regulatory element involved in light responsiveness
TaARFC1-A	G-box	CACGTC	1355	6	-	Zea mays	cis-acting regulatory element involved in light responsiveness
TaARFC1-A	TATA-box	TATA	401	4	+	Arabidopsis thaliana	core promoter element around -30 of transcription start
TaARFC1-A	TATA-box	TATA	439	4	+	Arabidopsis thaliana	core promoter element around -30 of transcription start
TaARFC1-A	TATA-box	ATTATA	609	6	+	Brassica napus	core promoter element around -30 of transcription start
TaARFC1-A	TATA-box	TATAA	610	5	-	Arabidopsis thaliana	core promoter element around -30 of transcription start
TaARFC1-A	TATA-box	TATA	611	4	+	Arabidopsis thaliana	core promoter element around -30 of transcription start
TaARFC1-A	TATA-box	TATA	1268	4	-	Arabidopsis thaliana	core promoter element around -30 of transcription start
TaARFC1-A	TATA-box	TATATA	1292	6	-	Arabidopsis thaliana	core promoter element around -30 of transcription start
TaARFC1-A	TATA-box	TATA	1294	4	-	Arabidopsis thaliana	core promoter element around -30 of transcription start
TaARFC1-A	TATA-box	TATA	1370	4	-	Arabidopsis thaliana	core promoter element around -30 of transcription start
TaARFC1-A	TATA-box	TATAA	1406	5	-	Arabidopsis thaliana	core promoter element around -30 of transcription start
TaARFC1-A	TATA-box	TATA	1407	4	-	Arabidopsis thaliana	core promoter element around -30 of transcription start
TaARFC1-A	CGTCA-motif	CGTCA	65	5	-	Hordeum vulgare	cis-acting regulatory element involved in the MeJA-responsiveness
TaARFC1-A	CGTCA-motif	CGTCA	197	5	-	Hordeum vulgare	cis-acting regulatory element involved in the MeJA-responsiveness
TaARFC1-A	CGTCA-motif	CGTCA	216	5	-	Hordeum vulgare	cis-acting regulatory element involved in the MeJA-responsiveness
TaARFC1-A	CGTCA-motif	CGTCA	1208	5	+	Hordeum vulgare	cis-acting regulatory element involved in the MeJA-responsiveness
TaARFC1-A	CGTCA-motif	CGTCA	1354	5	-	Hordeum vulgare	cis-acting regulatory element involved in the MeJA-responsiveness
TaARFC1-A	LTR	CCGAAA	1449	6	-	Hordeum vulgare	cis-acting element involved in low-temperature responsiveness
TaARFC1-A	CCAAT-box	CAACGG	553	6	+	Hordeum vulgare	MYBHv1 binding site
TaARFC1-A	CCAAT-box	CAACGG	692	6	+	Hordeum vulgare	MYBHv1 binding site
TaARFC1-A	CCAAT-box	CAACGG	843	6	-	Hordeum vulgare	MYBHv1 binding site
TaARFC1-A	CCAAT-box	CAACGG	1044	6	+	Hordeum vulgare	MYBHv1 binding site
TaARFC1-A	CAAT-box	CAAT	214	4	-	Nicotiana glutinosa
TaARFC1-A	CAAT-box	CAAAT	251	5	-	Pisum sativum	common cis-acting element in promoter and enhancer regions
TaARFC1-A	CAAT-box	CAAAT	293	5	-	Pisum sativum	common cis-acting element in promoter and enhancer regions
TaARFC1-A	CAAT-box	CAAAT	354	5	+	Pisum sativum	common cis-acting element in promoter and enhancer regions
TaARFC1-A	CAAT-box	CAAT	450	4	+	Nicotiana glutinosa
TaARFC1-A	CAAT-box	CAAAT	606	5	+	Pisum sativum	common cis-acting element in promoter and enhancer regions
TaARFC1-A	CAAT-box	CAAT	636	4	+	Nicotiana glutinosa
TaARFC1-A	CAAT-box	CAAAT	736	5	-	Pisum sativum	common cis-acting element in promoter and enhancer regions
TaARFC1-A	CAAT-box	CAAAT	788	5	-	Pisum sativum	common cis-acting element in promoter and enhancer regions
TaARFC1-A	CAAT-box	CAAAT	897	5	+	Pisum sativum	common cis-acting element in promoter and enhancer regions
TaARFC1-A	CAAT-box	CCAAT	902	5	+	Arabidopsis thaliana	common cis-acting element in promoter and enhancer regions
TaARFC1-A	CAAT-box	CAAT	903	4	+	Nicotiana glutinosa
TaARFC1-A	CAAT-box	CCAAT	1251	5	-	Arabidopsis thaliana	common cis-acting element in promoter and enhancer regions
TaARFC1-A	CAAT-box	CAAT	1321	4	-	Nicotiana glutinosa
TaARFC1-A	CAAT-box	CAAT	1342	4	-	Nicotiana glutinosa
TaARFC1-A	CAAT-box	CAAAT	1483	5	+	Pisum sativum	common cis-acting element in promoter and enhancer regions
TaARFC1-A	AuxRR-core	GGTCCAT	452	7	-	Nicotiana tabacum	cis-acting regulatory element involved in auxin responsiveness
TaARFC1-A	Box 4	ATTAAT	1390	6	-	Petroselinum crispum	part of a conserved DNA module involved in light responsiveness
TaARFC1-A	TGACG-motif	TGACG	65	5	+	Hordeum vulgare	cis-acting regulatory element involved in the MeJA-responsiveness
TaARFC1-A	TGACG-motif	TGACG	197	5	+	Hordeum vulgare	cis-acting regulatory element involved in the MeJA-responsiveness
TaARFC1-A	TGACG-motif	TGACG	216	5	+	Hordeum vulgare	cis-acting regulatory element involved in the MeJA-responsiveness
TaARFC1-A	TGACG-motif	TGACG	1208	5	-	Hordeum vulgare	cis-acting regulatory element involved in the MeJA-responsiveness
TaARFC1-A	TGACG-motif	TGACG	1354	5	+	Hordeum vulgare	cis-acting regulatory element involved in the MeJA-responsiveness
TaARFC1-A	MBS	CAACTG	276	6	+	Arabidopsis thaliana	MYB binding site involved in drought-inducibility
TaARFC1-A	MBS	CAACTG	282	6	+	Arabidopsis thaliana	MYB binding site involved in drought-inducibility
TaARFC1-B	Sp1	GGGCGG	996	6	-	Oryza sativa	light responsive element
TaARFC1-B	Sp1	GGGCGG	1151	6	+	Oryza sativa	light responsive element
TaARFC1-B	GC-motif	CCCCCG	1483	6	+	Zea mays	enhancer-like element involved in anoxic specific inducibility
TaARFC1-B	ABRE	CACGTG	471	6	+	Arabidopsis thaliana	cis-acting element involved in the abscisic acid responsiveness
TaARFC1-B	ABRE	ACGTG	472	5	+	Arabidopsis thaliana	cis-acting element involved in the abscisic acid responsiveness
TaARFC1-B	ABRE	AACCCGG	630	7	-	Arabidopsis thaliana	cis-acting element involved in the abscisic acid responsiveness
TaARFC1-B	ABRE	GCCGCGTGGC	862	9	-	Oryza sativa	cis-acting element involved in the abscisic acid responsiveness
TaARFC1-B	G-box	ACACGTGT	470	8	+	Brassica napus	cis-acting regulatory element involved in light responsiveness
TaARFC1-B	G-box	CACGTG	471	6	+	Arabidopsis thaliana	cis-acting regulatory element involved in light responsiveness
TaARFC1-B	ARE	AAACCA	262	6	+	Zea mays	cis-acting regulatory element essential for the anaerobic induction
TaARFC1-B	ARE	AAACCA	619	6	+	Zea mays	cis-acting regulatory element essential for the anaerobic induction
TaARFC1-B	ARE	AAACCA	1365	6	-	Zea mays	cis-acting regulatory element essential for the anaerobic induction
TaARFC1-B	TATA-box	TACAAAA	91	7	-	Oryza sativa	core promoter element around -30 of transcription start
TaARFC1-B	TATA-box	TATACA	94	6	-	Helianthus annuus	core promoter element around -30 of transcription start
TaARFC1-B	TATA-box	TATA	96	4	+	Arabidopsis thaliana	core promoter element around -30 of transcription start
TaARFC1-B	TATA-box	ATATAT	145	6	+	Brassica napus	core promoter element around -30 of transcription start
TaARFC1-B	TATA-box	TATATA	146	6	+	Arabidopsis thaliana	core promoter element around -30 of transcription start
TaARFC1-B	TATA-box	TATA	148	4	+	Arabidopsis thaliana	core promoter element around -30 of transcription start
TaARFC1-B	TATA-box	TATAAAA	155	7	-	Pisum sativum	core promoter element around -30 of transcription start
TaARFC1-B	TATA-box	TATAAA	156	6	-	Helianthus annuus	core promoter element around -30 of transcription start
TaARFC1-B	TATA-box	TATAA	157	5	-	Arabidopsis thaliana	core promoter element around -30 of transcription start
TaARFC1-B	TATA-box	TATA	158	4	+	Arabidopsis thaliana	core promoter element around -30 of transcription start
TaARFC1-B	TATA-box	TATAA	212	5	-	Arabidopsis thaliana	core promoter element around -30 of transcription start
TaARFC1-B	TATA-box	TATA	213	4	+	Arabidopsis thaliana	core promoter element around -30 of transcription start
TaARFC1-B	TATA-box	TATA	467	4	+	Arabidopsis thaliana	core promoter element around -30 of transcription start
TaARFC1-B	TATA-box	TATA	516	4	+	Arabidopsis thaliana	core promoter element around -30 of transcription start
TaARFC1-B	TATA-box	TACAAAA	518	7	+	Oryza sativa	core promoter element around -30 of transcription start
TaARFC1-B	TATA-box	TATA	534	4	+	Arabidopsis thaliana	core promoter element around -30 of transcription start
TaARFC1-B	TATA-box	TATA	560	4	+	Arabidopsis thaliana	core promoter element around -30 of transcription start
TaARFC1-B	TATA-box	TATA	762	4	-	Arabidopsis thaliana	core promoter element around -30 of transcription start
TaARFC1-B	TATA-box	TATAA	1298	5	-	Arabidopsis thaliana	core promoter element around -30 of transcription start
TaARFC1-B	TATA-box	TATA	1299	4	-	Arabidopsis thaliana	core promoter element around -30 of transcription start
TaARFC1-B	TATA-box	TATA	1330	4	-	Arabidopsis thaliana	core promoter element around -30 of transcription start
TaARFC1-B	TATA-box	TATATA	1398	6	-	Arabidopsis thaliana	core promoter element around -30 of transcription start
TaARFC1-B	TATA-box	ATATAT	1399	6	-	Brassica napus	core promoter element around -30 of transcription start
TaARFC1-B	TATA-box	TATATA	1400	6	-	Arabidopsis thaliana	core promoter element around -30 of transcription start
TaARFC1-B	TATA-box	TATA	1402	4	-	Arabidopsis thaliana	core promoter element around -30 of transcription start
TaARFC1-B	P-box	CCTTTTG	89	7	+	Oryza sativa	gibberellin-responsive element
TaARFC1-B	I-box	gGATAAGGTG	583	9	-	Zea mays	part of a light responsive element
TaARFC1-B	CGTCA-motif	CGTCA	885	5	+	Hordeum vulgare	cis-acting regulatory element involved in the MeJA-responsiveness
TaARFC1-B	CGTCA-motif	CGTCA	1193	5	+	Hordeum vulgare	cis-acting regulatory element involved in the MeJA-responsiveness
TaARFC1-B	CAAT-box	CAAT	16	4	+	Nicotiana glutinosa
TaARFC1-B	CAAT-box	CCAAT	73	5	-	Arabidopsis thaliana	common cis-acting element in promoter and enhancer regions
TaARFC1-B	CAAT-box	CAAT	105	4	-	Nicotiana glutinosa
TaARFC1-B	CAAT-box	CAAAT	250	5	+	Pisum sativum	common cis-acting element in promoter and enhancer regions
TaARFC1-B	CAAT-box	CAAT	439	4	-	Nicotiana glutinosa
TaARFC1-B	CAAT-box	CAAT	497	4	-	Nicotiana glutinosa
TaARFC1-B	CAAT-box	CAAAT	652	5	-	Pisum sativum	common cis-acting element in promoter and enhancer regions
TaARFC1-B	CAAT-box	CAAAT	681	5	+	Pisum sativum	common cis-acting element in promoter and enhancer regions
TaARFC1-B	CAAT-box	CCAAT	734	5	-	Arabidopsis thaliana	common cis-acting element in promoter and enhancer regions
TaARFC1-B	CAAT-box	CCAAT	783	5	-	Arabidopsis thaliana	common cis-acting element in promoter and enhancer regions
TaARFC1-B	CAAT-box	CAAT	808	4	+	Nicotiana glutinosa
TaARFC1-B	CAAT-box	CAAAT	810	5	-	Pisum sativum	common cis-acting element in promoter and enhancer regions
TaARFC1-B	CAAT-box	CAAT	1196	4	+	Nicotiana glutinosa
TaARFC1-B	CAAT-box	CAAT	1277	4	+	Nicotiana glutinosa
TaARFC1-B	CAAT-box	CAAT	1355	4	-	Nicotiana glutinosa
TaARFC1-B	CAAT-box	CAAAT	1449	5	+	Pisum sativum	common cis-acting element in promoter and enhancer regions
TaARFC1-B	TGA-element	AACGAC	645	6	+	Brassica oleracea	auxin-responsive element
TaARFC1-B	TGA-element	AACGAC	656	6	-	Brassica oleracea	auxin-responsive element
TaARFC1-B	TGA-element	AACGAC	767	6	-	Brassica oleracea	auxin-responsive element
TaARFC1-B	TGA-element	AACGAC	1067	6	+	Brassica oleracea	auxin-responsive element
TaARFC1-B	G-Box	CACGTG	471	6	+	Pisum sativum	cis-acting regulatory element involved in light responsiveness
TaARFC1-B	A-box	CCGTCC	894	6	-	Petroselinum crispum	cis-acting regulatory element
TaARFC1-B	A-box	CCGTCC	1443	6	-	Petroselinum crispum	cis-acting regulatory element
TaARFC1-B	Box 4	ATTAAT	435	6	+	Petroselinum crispum	part of a conserved DNA module involved in light responsiveness
TaARFC1-B	TGACG-motif	TGACG	885	5	-	Hordeum vulgare	cis-acting regulatory element involved in the MeJA-responsiveness
TaARFC1-B	TGACG-motif	TGACG	1193	5	-	Hordeum vulgare	cis-acting regulatory element involved in the MeJA-responsiveness
TaARFC1-D	G-box	CACGAC	1167	6	-	Zea mays	cis-acting regulatory element involved in light responsiveness
TaARFC1-D	P-box	CCTTTTG	1350	7	-	Oryza sativa	gibberellin-responsive element
TaARFC1-D	TATA-box	ATATAA	80	6	+	Brassica oleracea	core promoter element around -30 of transcription start
TaARFC1-D	TATA-box	TATA	81	4	+	Arabidopsis thaliana	core promoter element around -30 of transcription start
TaARFC1-D	TATA-box	TATACA	118	6	-	Helianthus annuus	core promoter element around -30 of transcription start
TaARFC1-D	TATA-box	TATA	120	4	+	Arabidopsis thaliana	core promoter element around -30 of transcription start
TaARFC1-D	TATA-box	TATACA	147	6	-	Helianthus annuus	core promoter element around -30 of transcription start
TaARFC1-D	TATA-box	TATATA	149	6	+	Arabidopsis thaliana	core promoter element around -30 of transcription start
TaARFC1-D	TATA-box	TATA	151	4	+	Arabidopsis thaliana	core promoter element around -30 of transcription start
TaARFC1-D	TATA-box	ccTATAAAaa	296	9	-	Arabidopsis thaliana	core promoter element around -30 of transcription start
TaARFC1-D	TATA-box	TATA	491	4	+	Arabidopsis thaliana	core promoter element around -30 of transcription start
TaARFC1-D	TATA-box	TATA	551	4	+	Arabidopsis thaliana	core promoter element around -30 of transcription start
TaARFC1-D	TATA-box	TAAAGATT	651	8	+	Arabidopsis thaliana	core promoter element around -30 of transcription start
TaARFC1-D	TATA-box	taTATAAAtc	655	9	-	Arabidopsis thaliana	core promoter element around -30 of transcription start
TaARFC1-D	TATA-box	TATACA	659	6	-	Helianthus annuus	core promoter element around -30 of transcription start
TaARFC1-D	TATA-box	TATA	661	4	+	Arabidopsis thaliana	core promoter element around -30 of transcription start
TaARFC1-D	TATA-box	TATTTAAA	663	8	+	Arabidopsis thaliana	core promoter element around -30 of transcription start
TaARFC1-D	TATA-box	TATA	681	4	+	Arabidopsis thaliana	core promoter element around -30 of transcription start
TaARFC1-D	TATA-box	TATATA	1159	6	-	Arabidopsis thaliana	core promoter element around -30 of transcription start
TaARFC1-D	TATA-box	ATATAA	1160	6	+	Brassica oleracea	core promoter element around -30 of transcription start
TaARFC1-D	TATA-box	TATA	1161	4	-	Arabidopsis thaliana	core promoter element around -30 of transcription start
TaARFC1-D	TATA-box	TATA	1186	4	-	Arabidopsis thaliana	core promoter element around -30 of transcription start
TaARFC1-D	TATA-box	TATAAAA	1227	7	-	Pisum sativum	core promoter element around -30 of transcription start
TaARFC1-D	TATA-box	TATAAA	1228	6	-	Helianthus annuus	core promoter element around -30 of transcription start
TaARFC1-D	TATA-box	TATAA	1229	5	-	Arabidopsis thaliana	core promoter element around -30 of transcription start
TaARFC1-D	TATA-box	TATA	1230	4	-	Arabidopsis thaliana	core promoter element around -30 of transcription start
TaARFC1-D	TATA-box	ATATAA	1264	6	+	Brassica oleracea	core promoter element around -30 of transcription start
TaARFC1-D	TATA-box	TATA	1265	4	-	Arabidopsis thaliana	core promoter element around -30 of transcription start
TaARFC1-D	TATA-box	TATAAAA	1282	7	-	Pisum sativum	core promoter element around -30 of transcription start
TaARFC1-D	TATA-box	TATAAA	1283	6	-	Helianthus annuus	core promoter element around -30 of transcription start
TaARFC1-D	TATA-box	TATAA	1284	5	-	Arabidopsis thaliana	core promoter element around -30 of transcription start
TaARFC1-D	TATA-box	TATA	1285	4	-	Arabidopsis thaliana	core promoter element around -30 of transcription start
TaARFC1-D	TATA-box	TATAAGAA	1312	8	-	Zea mays	core promoter element around -30 of transcription start
TaARFC1-D	TATA-box	TATAA	1315	5	-	Arabidopsis thaliana	core promoter element around -30 of transcription start
TaARFC1-D	TATA-box	TATA	1316	4	-	Arabidopsis thaliana	core promoter element around -30 of transcription start
TaARFC1-D	TATA-box	TATA	1412	4	-	Arabidopsis thaliana	core promoter element around -30 of transcription start
TaARFC1-D	TCT-motif	TCTTAC	1437	6	+	Arabidopsis thaliana	part of a light responsive element
TaARFC1-D	TCA-element	CCATCTTTTT	888	9	+	Nicotiana tabacum	cis-acting element involved in salicylic acid responsiveness
TaARFC1-D	TCA-element	CCATCTTTTT	952	10	+	Nicotiana tabacum	cis-acting element involved in salicylic acid responsiveness
TaARFC1-D	Box 4	ATTAAT	109	6	+	Petroselinum crispum	part of a conserved DNA module involved in light responsiveness
TaARFC1-D	CAT-box	GCCACT	969	6	-	Arabidopsis thaliana	cis-acting regulatory element related to meristem expression
TaARFC1-D	CAT-box	GCCACT	1467	6	+	Arabidopsis thaliana	cis-acting regulatory element related to meristem expression
TaARFC1-D	CCAAT-box	CAACGG	860	6	-	Hordeum vulgare	MYBHv1 binding site
TaARFC1-D	CAAT-box	CAAAT	179	5	+	Pisum sativum	common cis-acting element in promoter and enhancer regions
TaARFC1-D	CAAT-box	CAAT	185	4	+	Nicotiana glutinosa
TaARFC1-D	CAAT-box	CAAT	231	4	+	Nicotiana glutinosa
TaARFC1-D	CAAT-box	CAAT	272	4	-	Nicotiana glutinosa
TaARFC1-D	CAAT-box	CAAT	282	4	-	Nicotiana glutinosa
TaARFC1-D	CAAT-box	CAAT	289	4	+	Nicotiana glutinosa
TaARFC1-D	CAAT-box	CAAT	315	4	-	Nicotiana glutinosa
TaARFC1-D	CAAT-box	CAAT	400	4	-	Nicotiana glutinosa
TaARFC1-D	CAAT-box	CAAT	411	4	+	Nicotiana glutinosa
TaARFC1-D	CAAT-box	CAAAT	445	5	+	Pisum sativum	common cis-acting element in promoter and enhancer regions
TaARFC1-D	CAAT-box	CAAT	465	4	+	Nicotiana glutinosa
TaARFC1-D	CAAT-box	CAAAT	470	5	+	Pisum sativum	common cis-acting element in promoter and enhancer regions
TaARFC1-D	CAAT-box	CAAAT	523	5	+	Pisum sativum	common cis-acting element in promoter and enhancer regions
TaARFC1-D	CAAT-box	CAAT	526	4	-	Nicotiana glutinosa
TaARFC1-D	CAAT-box	CAAAT	545	5	+	Pisum sativum	common cis-acting element in promoter and enhancer regions
TaARFC1-D	CAAT-box	CCAAT	601	5	+	Arabidopsis thaliana	common cis-acting element in promoter and enhancer regions
TaARFC1-D	CAAT-box	CAAT	602	4	+	Nicotiana glutinosa
TaARFC1-D	CAAT-box	CAAAT	621	5	-	Pisum sativum	common cis-acting element in promoter and enhancer regions
TaARFC1-D	CAAT-box	CAAAT	631	5	+	Pisum sativum	common cis-acting element in promoter and enhancer regions
TaARFC1-D	CAAT-box	CAAAT	656	5	-	Pisum sativum	common cis-acting element in promoter and enhancer regions
TaARFC1-D	CAAT-box	CAAT	720	4	+	Nicotiana glutinosa
TaARFC1-D	CAAT-box	CAAAT	739	5	+	Pisum sativum	common cis-acting element in promoter and enhancer regions
TaARFC1-D	CAAT-box	CAAT	753	4	-	Nicotiana glutinosa
TaARFC1-D	CAAT-box	CAAT	761	4	+	Nicotiana glutinosa
TaARFC1-D	CAAT-box	CAAT	813	4	-	Nicotiana glutinosa
TaARFC1-D	CAAT-box	CCAAT	846	5	+	Arabidopsis thaliana	common cis-acting element in promoter and enhancer regions
TaARFC1-D	CAAT-box	CAAT	847	4	+	Nicotiana glutinosa
TaARFC1-D	CAAT-box	CAAAT	944	5	+	Pisum sativum	common cis-acting element in promoter and enhancer regions
TaARFC1-D	CAAT-box	CAAT	976	4	-	Nicotiana glutinosa
TaARFC1-D	CAAT-box	CAAAT	1039	5	-	Pisum sativum	common cis-acting element in promoter and enhancer regions
TaARFC1-D	CAAT-box	CAAT	1098	4	+	Nicotiana glutinosa
TaARFC1-D	CAAT-box	CAAAT	1216	5	+	Pisum sativum	common cis-acting element in promoter and enhancer regions
TaARFC1-D	CAAT-box	CAAAT	1219	5	-	Pisum sativum	common cis-acting element in promoter and enhancer regions
TaARFC1-D	CAAT-box	CAAT	1241	4	+	Nicotiana glutinosa
TaARFC1-D	CAAT-box	CAAT	1375	4	-	Nicotiana glutinosa
TaARFC1-D	CAAT-box	CAAT	1423	4	+	Nicotiana glutinosa
TaARFC1-D	CAAT-box	CAAT	1425	4	-	Nicotiana glutinosa
TaARFC1-D	CAAT-box	CAAAT	1479	5	+	Pisum sativum	common cis-acting element in promoter and enhancer regions
TaARFC1-D	CAAT-box	CAAAT	1482	5	-	Pisum sativum	common cis-acting element in promoter and enhancer regions
TaARFC1-D	LTR	CCGAAA	405	6	+	Hordeum vulgare	cis-acting element involved in low-temperature responsiveness
TaARL1a-A	TATA-box	TATATA	204	6	+	Arabidopsis thaliana	core promoter element around -30 of transcription start
TaARL1a-A	TATA-box	TATA	206	4	+	Arabidopsis thaliana	core promoter element around -30 of transcription start
TaARL1a-A	TATA-box	TATA	567	4	+	Arabidopsis thaliana	core promoter element around -30 of transcription start
TaARL1a-A	TATA-box	TATACA	902	6	-	Helianthus annuus	core promoter element around -30 of transcription start
TaARL1a-A	TATA-box	TATATA	904	6	-	Arabidopsis thaliana	core promoter element around -30 of transcription start
TaARL1a-A	TATA-box	TATA	906	4	-	Arabidopsis thaliana	core promoter element around -30 of transcription start
TaARL1a-A	TATA-box	TATA	914	4	-	Arabidopsis thaliana	core promoter element around -30 of transcription start
TaARL1a-A	TATA-box	TATATA	1219	6	-	Arabidopsis thaliana	core promoter element around -30 of transcription start
TaARL1a-A	TATA-box	TATA	1221	4	-	Arabidopsis thaliana	core promoter element around -30 of transcription start
TaARL1a-A	TATA-box	TATA	1245	4	-	Arabidopsis thaliana	core promoter element around -30 of transcription start
TaARL1a-A	TATA-box	ATATAT	1256	6	-	Brassica napus	core promoter element around -30 of transcription start
TaARL1a-A	TATA-box	TATA	1257	4	-	Arabidopsis thaliana	core promoter element around -30 of transcription start
TaARL1a-A	TATA-box	TATA	1335	4	-	Arabidopsis thaliana	core promoter element around -30 of transcription start
TaARL1a-A	TATA-box	ATATAA	1427	6	+	Brassica oleracea	core promoter element around -30 of transcription start
TaARL1a-A	TATA-box	TATA	1428	4	-	Arabidopsis thaliana	core promoter element around -30 of transcription start
TaARL1a-A	ABRE	ACGTG	209	5	+	Arabidopsis thaliana	cis-acting element involved in the abscisic acid responsiveness
TaARL1a-A	ABRE	ACGTG	424	5	+	Arabidopsis thaliana	cis-acting element involved in the abscisic acid responsiveness
TaARL1a-A	ABRE	ACGTG	540	5	+	Arabidopsis thaliana	cis-acting element involved in the abscisic acid responsiveness
TaARL1a-A	G-box	TACGTG	208	6	+	Arabidopsis thaliana	cis-acting regulatory element involved in light responsiveness
TaARL1a-A	G-box	TACGTG	539	6	+	Arabidopsis thaliana	cis-acting regulatory element involved in light responsiveness
TaARL1a-A	G-box	CACGAC	769	6	-	Zea mays	cis-acting regulatory element involved in light responsiveness
TaARL1a-A	CGTCA-motif	CGTCA	410	5	+	Hordeum vulgare	cis-acting regulatory element involved in the MeJA-responsiveness
TaARL1a-A	CGTCA-motif	CGTCA	730	5	-	Hordeum vulgare	cis-acting regulatory element involved in the MeJA-responsiveness
TaARL1a-A	CGTCA-motif	CGTCA	972	5	-	Hordeum vulgare	cis-acting regulatory element involved in the MeJA-responsiveness
TaARL1a-A	LTR	CCGAAA	523	6	-	Hordeum vulgare	cis-acting element involved in low-temperature responsiveness
TaARL1a-A	CAAT-box	CCAAT	23	5	+	Arabidopsis thaliana	common cis-acting element in promoter and enhancer regions
TaARL1a-A	CAAT-box	CAAT	24	4	+	Nicotiana glutinosa
TaARL1a-A	CAAT-box	CCAAT	32	5	-	Arabidopsis thaliana	common cis-acting element in promoter and enhancer regions
TaARL1a-A	CAAT-box	CAAT	414	4	-	Nicotiana glutinosa
TaARL1a-A	CAAT-box	CAAT	616	4	-	Nicotiana glutinosa
TaARL1a-A	CAAT-box	CAAT	676	4	+	Nicotiana glutinosa
TaARL1a-A	CAAT-box	CAAT	760	4	+	Nicotiana glutinosa
TaARL1a-A	CAAT-box	CCAAT	799	5	-	Arabidopsis thaliana	common cis-acting element in promoter and enhancer regions
TaARL1a-A	CAAT-box	CCAAT	811	5	+	Arabidopsis thaliana	common cis-acting element in promoter and enhancer regions
TaARL1a-A	CAAT-box	CAAT	812	4	+	Nicotiana glutinosa
TaARL1a-A	CAAT-box	CAAT	821	4	-	Nicotiana glutinosa
TaARL1a-A	CAAT-box	CAAT	829	4	+	Nicotiana glutinosa
TaARL1a-A	CAAT-box	CAAAT	835	5	-	Pisum sativum	common cis-acting element in promoter and enhancer regions
TaARL1a-A	CAAT-box	CCAAT	883	5	-	Arabidopsis thaliana	common cis-acting element in promoter and enhancer regions
TaARL1a-A	CAAT-box	CAAT	897	4	+	Nicotiana glutinosa
TaARL1a-A	CAAT-box	CAAAT	935	5	-	Pisum sativum	common cis-acting element in promoter and enhancer regions
TaARL1a-A	CAAT-box	CAAAT	984	5	+	Pisum sativum	common cis-acting element in promoter and enhancer regions
TaARL1a-A	CAAT-box	CAAT	995	4	+	Nicotiana glutinosa
TaARL1a-A	CAAT-box	CAAAT	1026	5	-	Pisum sativum	common cis-acting element in promoter and enhancer regions
TaARL1a-A	CAAT-box	CAAAT	1287	5	-	Pisum sativum	common cis-acting element in promoter and enhancer regions
TaARL1a-A	CAAT-box	CAAAT	1307	5	+	Pisum sativum	common cis-acting element in promoter and enhancer regions
TaARL1a-A	CAAT-box	CAAT	1344	4	-	Nicotiana glutinosa
TaARL1a-A	CAAT-box	CAAT	1348	4	+	Nicotiana glutinosa
TaARL1a-A	CAAT-box	CAAT	1359	4	+	Nicotiana glutinosa
TaARL1a-A	CAAT-box	CCAAT	1378	5	-	Arabidopsis thaliana	common cis-acting element in promoter and enhancer regions
TaARL1a-A	CCAAT-box	CAACGG	99	6	-	Hordeum vulgare	MYBHv1 binding site
TaARL1a-A	CCAAT-box	CAACGG	1057	6	-	Hordeum vulgare	MYBHv1 binding site
TaARL1a-A	TGACG-motif	TGACG	410	5	-	Hordeum vulgare	cis-acting regulatory element involved in the MeJA-responsiveness
TaARL1a-A	TGACG-motif	TGACG	730	5	+	Hordeum vulgare	cis-acting regulatory element involved in the MeJA-responsiveness
TaARL1a-A	TGACG-motif	TGACG	972	5	+	Hordeum vulgare	cis-acting regulatory element involved in the MeJA-responsiveness
TaARL1a-A	MBS	CAACTG	239	6	-	Arabidopsis thaliana	MYB binding site involved in drought-inducibility
TaARL1a-A	G-Box	CACGTT	423	6	-	Pisum sativum	cis-acting regulatory element involved in light responsiveness
TaARL1a-B	CAAT-box	CAAAT	14	5	-	Pisum sativum	common cis-acting element in promoter and enhancer regions
TaARL1a-B	CAAT-box	CAAAT	363	5	+	Pisum sativum	common cis-acting element in promoter and enhancer regions
TaARL1a-B	CAAT-box	CAACCAACTCC	540	10	-	Arabidopsis thaliana	common cis-acting element in promoter and enhancer regions
TaARL1a-B	CAAT-box	CAAT	651	4	+	Nicotiana glutinosa
TaARL1a-B	CAAT-box	CAAAT	825	5	-	Pisum sativum	common cis-acting element in promoter and enhancer regions
TaARL1a-B	CAAT-box	CAAT	908	4	+	Nicotiana glutinosa
TaARL1a-B	CAAT-box	CAAT	928	4	+	Nicotiana glutinosa
TaARL1a-B	CAAT-box	CAAT	936	4	-	Nicotiana glutinosa
TaARL1a-B	CAAT-box	CAAT	948	4	+	Nicotiana glutinosa
TaARL1a-B	CAAT-box	CAAT	1058	4	+	Nicotiana glutinosa
TaARL1a-B	CAAT-box	CAAAT	1126	5	+	Pisum sativum	common cis-acting element in promoter and enhancer regions
TaARL1a-B	CAAT-box	CAAT	1158	4	-	Nicotiana glutinosa
TaARL1a-B	CAAT-box	CAAT	1364	4	+	Nicotiana glutinosa
TaARL1a-B	CAAT-box	CAAAT	1366	5	-	Pisum sativum	common cis-acting element in promoter and enhancer regions
TaARL1a-B	CAAT-box	CCAAT	1407	5	+	Arabidopsis thaliana	common cis-acting element in promoter and enhancer regions
TaARL1a-B	CAAT-box	CAAT	1408	4	+	Nicotiana glutinosa
TaARL1a-B	CAAT-box	CCAAT	1482	5	-	Arabidopsis thaliana	common cis-acting element in promoter and enhancer regions
TaARL1a-B	CGTCA-motif	CGTCA	69	5	+	Hordeum vulgare	cis-acting regulatory element involved in the MeJA-responsiveness
TaARL1a-B	CGTCA-motif	CGTCA	1361	5	+	Hordeum vulgare	cis-acting regulatory element involved in the MeJA-responsiveness
TaARL1a-B	LTR	CCGAAA	495	6	+	Hordeum vulgare	cis-acting element involved in low-temperature responsiveness
TaARL1a-B	A-box	CCGTCC	212	6	-	Petroselinum crispum	cis-acting regulatory element
TaARL1a-B	TGA-element	AACGAC	1066	6	-	Brassica oleracea	auxin-responsive element
TaARL1a-B	MBS	CAACTG	95	6	+	Arabidopsis thaliana	MYB binding site involved in drought-inducibility
TaARL1a-B	TGACG-motif	TGACG	69	5	-	Hordeum vulgare	cis-acting regulatory element involved in the MeJA-responsiveness
TaARL1a-B	TGACG-motif	TGACG	1361	5	-	Hordeum vulgare	cis-acting regulatory element involved in the MeJA-responsiveness
TaARL1a-B	Sp1	GGGCGG	505	6	+	Oryza sativa	light responsive element
TaARL1a-B	O2-site	GATGATGTGG	322	9	-	Zea mays	cis-acting regulatory element involved in zein metabolism regulation
TaARL1a-B	G-box	TACGTG	60	6	-	Arabidopsis thaliana	cis-acting regulatory element involved in light responsiveness
TaARL1a-B	G-box	CACGTC	470	6	-	Zea mays	cis-acting regulatory element involved in light responsiveness
TaARL1a-B	G-box	TACGTG	1346	6	-	Arabidopsis thaliana	cis-acting regulatory element involved in light responsiveness
TaARL1a-B	ARE	AAACCA	701	6	-	Zea mays	cis-acting regulatory element essential for the anaerobic induction
TaARL1a-B	ARE	AAACCA	1220	6	+	Zea mays	cis-acting regulatory element essential for the anaerobic induction
TaARL1a-B	ABRE	ACGTG	60	5	-	Arabidopsis thaliana	cis-acting element involved in the abscisic acid responsiveness
TaARL1a-B	ABRE	CGTACGTGCA	268	9	+	Hordeum vulgare	cis-acting element involved in the abscisic acid responsiveness
TaARL1a-B	ABRE	ACGTG	471	5	+	Arabidopsis thaliana	cis-acting element involved in the abscisic acid responsiveness
TaARL1a-B	ABRE	GCCGCGTGGC	513	9	-	Oryza sativa	cis-acting element involved in the abscisic acid responsiveness
TaARL1a-B	ABRE	GCCGCGTGGC	860	10	-	Oryza sativa	cis-acting element involved in the abscisic acid responsiveness
TaARL1a-B	ABRE	CGTACGTGCA	1344	9	-	Hordeum vulgare	cis-acting element involved in the abscisic acid responsiveness
TaARL1a-B	ABRE	ACGTG	1346	5	-	Arabidopsis thaliana	cis-acting element involved in the abscisic acid responsiveness
TaARL1a-B	GC-motif	CCCCCG	620	6	-	Zea mays	enhancer-like element involved in anoxic specific inducibility
TaARL1a-B	TATA-box	TATA	598	4	+	Arabidopsis thaliana	core promoter element around -30 of transcription start
TaARL1a-B	TATA-box	ccTATAAAaa	1012	9	-	Arabidopsis thaliana	core promoter element around -30 of transcription start
TaARL1a-B	TATA-box	TATAA	1015	5	-	Arabidopsis thaliana	core promoter element around -30 of transcription start
TaARL1a-B	TATA-box	TATA	1016	4	-	Arabidopsis thaliana	core promoter element around -30 of transcription start
TaARL1a-B	TATA-box	TATAAA	1333	6	-	Helianthus annuus	core promoter element around -30 of transcription start
TaARL1a-B	TATA-box	TATAA	1334	5	-	Arabidopsis thaliana	core promoter element around -30 of transcription start
TaARL1a-B	TATA-box	TATA	1335	4	-	Arabidopsis thaliana	core promoter element around -30 of transcription start
TaARL1a-B	TATA-box	ATATAT	1389	6	-	Brassica napus	core promoter element around -30 of transcription start
TaARL1a-B	TATA-box	TATA	1390	4	-	Arabidopsis thaliana	core promoter element around -30 of transcription start
TaARL1a-B	TATA-box	TACAAAA	1395	7	+	Oryza sativa	core promoter element around -30 of transcription start
TaARL1a-B	TATA-box	TATA	1403	4	-	Arabidopsis thaliana	core promoter element around -30 of transcription start
TaARL1a-B	TATA-box	ATATAA	1410	6	+	Brassica oleracea	core promoter element around -30 of transcription start
TaARL1a-B	TATA-box	TATA	1411	4	-	Arabidopsis thaliana	core promoter element around -30 of transcription start
TaARL1a-B	TATA-box	TAAAGATT	1436	8	+	Arabidopsis thaliana	core promoter element around -30 of transcription start
TaARL1a-B	TATA-box	TATATAA	1455	7	-	Arabidopsis thaliana	core promoter element around -30 of transcription start
TaARL1a-B	TATA-box	TATATA	1456	6	-	Arabidopsis thaliana	core promoter element around -30 of transcription start
TaARL1a-B	TATA-box	TATA	1458	4	-	Arabidopsis thaliana	core promoter element around -30 of transcription start
TaARL1a-B	TATA-box	TATATA	1463	6	-	Arabidopsis thaliana	core promoter element around -30 of transcription start
TaARL1a-B	TATA-box	ATATAT	1464	6	-	Brassica napus	core promoter element around -30 of transcription start
TaARL1a-B	TATA-box	TATA	1465	4	-	Arabidopsis thaliana	core promoter element around -30 of transcription start
TaARL1a-B	TATA-box	TATA	1496	4	-	Arabidopsis thaliana	core promoter element around -30 of transcription start
TaARL1a-D	G-box	TACGTG	83	6	-	Arabidopsis thaliana	cis-acting regulatory element involved in light responsiveness
TaARL1a-D	G-box	TACGTG	411	6	-	Arabidopsis thaliana	cis-acting regulatory element involved in light responsiveness
TaARL1a-D	G-box	CACGTG	804	6	-	Arabidopsis thaliana	cis-acting regulatory element involved in light responsiveness
TaARL1a-D	G-box	ACACGTGT	1011	8	-	Brassica napus	cis-acting regulatory element involved in light responsiveness
TaARL1a-D	G-box	CACGTG	1012	6	-	Arabidopsis thaliana	cis-acting regulatory element involved in light responsiveness
TaARL1a-D	ARE	AAACCA	1323	6	-	Zea mays	cis-acting regulatory element essential for the anaerobic induction
TaARL1a-D	ABRE	ACGTG	59	5	-	Arabidopsis thaliana	cis-acting element involved in the abscisic acid responsiveness
TaARL1a-D	ABRE	ACGTG	83	5	-	Arabidopsis thaliana	cis-acting element involved in the abscisic acid responsiveness
TaARL1a-D	ABRE	CGTACGTGCA	409	9	-	Hordeum vulgare	cis-acting element involved in the abscisic acid responsiveness
TaARL1a-D	ABRE	ACGTG	411	5	-	Arabidopsis thaliana	cis-acting element involved in the abscisic acid responsiveness
TaARL1a-D	ABRE	CACGTG	804	6	-	Arabidopsis thaliana	cis-acting element involved in the abscisic acid responsiveness
TaARL1a-D	ABRE	ACGTG	805	5	+	Arabidopsis thaliana	cis-acting element involved in the abscisic acid responsiveness
TaARL1a-D	ABRE	ACGTG	985	5	+	Arabidopsis thaliana	cis-acting element involved in the abscisic acid responsiveness
TaARL1a-D	ABRE	CACGTG	1012	6	-	Arabidopsis thaliana	cis-acting element involved in the abscisic acid responsiveness
TaARL1a-D	ABRE	ACGTG	1013	5	+	Arabidopsis thaliana	cis-acting element involved in the abscisic acid responsiveness
TaARL1a-D	TATA-box	TATACA	296	6	-	Helianthus annuus	core promoter element around -30 of transcription start
TaARL1a-D	TATA-box	TATA	298	4	+	Arabidopsis thaliana	core promoter element around -30 of transcription start
TaARL1a-D	TATA-box	TACAAAA	520	7	-	Oryza sativa	core promoter element around -30 of transcription start
TaARL1a-D	TCT-motif	TCTTAC	888	6	-	Arabidopsis thaliana	part of a light responsive element
TaARL1a-D	Sp1	GGGCGG	1112	6	-	Oryza sativa	light responsive element
TaARL1a-D	Sp1	GGGCGG	1149	6	-	Oryza sativa	light responsive element
TaARL1a-D	A-box	CCGTCC	30	6	+	Petroselinum crispum	cis-acting regulatory element
TaARL1a-D	AuxRR-core	GGTCCAT	770	7	+	Nicotiana tabacum	cis-acting regulatory element involved in auxin responsiveness
TaARL1a-D	G-Box	CACGTT	59	6	+	Pisum sativum	cis-acting regulatory element involved in light responsiveness
TaARL1a-D	G-Box	CACGTG	804	6	-	Pisum sativum	cis-acting regulatory element involved in light responsiveness
TaARL1a-D	G-Box	CACGTT	984	6	-	Pisum sativum	cis-acting regulatory element involved in light responsiveness
TaARL1a-D	G-Box	CACGTG	1012	6	-	Pisum sativum	cis-acting regulatory element involved in light responsiveness
TaARL1a-D	TGA-element	AACGAC	1335	6	+	Brassica oleracea	auxin-responsive element
TaARL1a-D	MBS	CAACTG	275	6	-	Arabidopsis thaliana	MYB binding site involved in drought-inducibility
TaARL1a-D	MBS	CAACTG	305	6	+	Arabidopsis thaliana	MYB binding site involved in drought-inducibility
TaARL1a-D	MBS	CAACTG	365	6	-	Arabidopsis thaliana	MYB binding site involved in drought-inducibility
TaARL1a-D	MBS	CAACTG	447	6	+	Arabidopsis thaliana	MYB binding site involved in drought-inducibility
TaARL1a-D	MBS	CAACTG	538	6	+	Arabidopsis thaliana	MYB binding site involved in drought-inducibility
TaARL1a-D	MBS	CAACTG	588	6	+	Arabidopsis thaliana	MYB binding site involved in drought-inducibility
TaARL1a-D	MBS	CAACTG	670	6	+	Arabidopsis thaliana	MYB binding site involved in drought-inducibility
TaARL1a-D	MBS	CAACTG	676	6	-	Arabidopsis thaliana	MYB binding site involved in drought-inducibility
TaARL1a-D	MBS	CAACTG	693	6	+	Arabidopsis thaliana	MYB binding site involved in drought-inducibility
TaARL1a-D	MBS	CAACTG	737	6	+	Arabidopsis thaliana	MYB binding site involved in drought-inducibility
TaARL1a-D	MBS	CAACTG	779	6	+	Arabidopsis thaliana	MYB binding site involved in drought-inducibility
TaARL1a-D	TGACG-motif	TGACG	839	5	+	Hordeum vulgare	cis-acting regulatory element involved in the MeJA-responsiveness
TaARL1a-D	CAAT-box	CAAT	321	4	-	Nicotiana glutinosa
TaARL1a-D	CAAT-box	CAAT	644	4	+	Nicotiana glutinosa
TaARL1a-D	CAAT-box	CAAT	1231	4	-	Nicotiana glutinosa
TaARL1a-D	CAAT-box	AGCTCAATTTCA	1296	11	+	Daucus carota	common cis-acting element in promoter and enhancer regions
TaARL1a-D	CAAT-box	CAAT	1300	4	+	Nicotiana glutinosa
TaARL1a-D	CGTCA-motif	CGTCA	839	5	-	Hordeum vulgare	cis-acting regulatory element involved in the MeJA-responsiveness
TaARL1a-D	I-box	ccttatcct	88	9	-	Arabidopsis thaliana	part of a light responsive element
TaARL1a-D	I-box	gGATAAGGTG	89	9	+	Zea mays	part of a light responsive element
TaARL1b-A	TCA-element	CCATCTTTTT	1433	9	-	Nicotiana tabacum	cis-acting element involved in salicylic acid responsiveness
TaARL1b-A	Sp1	GGGCGG	190	6	-	Oryza sativa	light responsive element
TaARL1b-A	TATA-box	ATATAA	12	6	+	Brassica oleracea	core promoter element around -30 of transcription start
TaARL1b-A	TATA-box	TATA	13	4	+	Arabidopsis thaliana	core promoter element around -30 of transcription start
TaARL1b-A	TATA-box	TATAAA	114	6	-	Helianthus annuus	core promoter element around -30 of transcription start
TaARL1b-A	TATA-box	TATAA	115	5	-	Arabidopsis thaliana	core promoter element around -30 of transcription start
TaARL1b-A	TATA-box	TATA	116	4	+	Arabidopsis thaliana	core promoter element around -30 of transcription start
TaARL1b-A	TATA-box	TATATA	532	6	+	Arabidopsis thaliana	core promoter element around -30 of transcription start
TaARL1b-A	TATA-box	ATATAA	533	6	+	Brassica oleracea	core promoter element around -30 of transcription start
TaARL1b-A	TATA-box	TATA	534	4	+	Arabidopsis thaliana	core promoter element around -30 of transcription start
TaARL1b-A	TATA-box	TATA	956	4	-	Arabidopsis thaliana	core promoter element around -30 of transcription start
TaARL1b-A	TATA-box	TATA	993	4	-	Arabidopsis thaliana	core promoter element around -30 of transcription start
TaARL1b-A	TATA-box	ATATAA	1101	6	+	Brassica oleracea	core promoter element around -30 of transcription start
TaARL1b-A	TATA-box	TATA	1102	4	-	Arabidopsis thaliana	core promoter element around -30 of transcription start
TaARL1b-A	TATA-box	TATAA	1112	5	-	Arabidopsis thaliana	core promoter element around -30 of transcription start
TaARL1b-A	TATA-box	TATA	1113	4	-	Arabidopsis thaliana	core promoter element around -30 of transcription start
TaARL1b-A	TATA-box	TATAAAA	1212	7	-	Pisum sativum	core promoter element around -30 of transcription start
TaARL1b-A	TATA-box	TATAAA	1213	6	-	Helianthus annuus	core promoter element around -30 of transcription start
TaARL1b-A	TATA-box	TATAA	1214	5	-	Arabidopsis thaliana	core promoter element around -30 of transcription start
TaARL1b-A	TATA-box	TATA	1215	4	-	Arabidopsis thaliana	core promoter element around -30 of transcription start
TaARL1b-A	TATA-box	TATAAAA	1232	7	-	Pisum sativum	core promoter element around -30 of transcription start
TaARL1b-A	TATA-box	TATAAA	1233	6	-	Helianthus annuus	core promoter element around -30 of transcription start
TaARL1b-A	TATA-box	TATAA	1234	5	-	Arabidopsis thaliana	core promoter element around -30 of transcription start
TaARL1b-A	TATA-box	TATA	1235	4	-	Arabidopsis thaliana	core promoter element around -30 of transcription start
TaARL1b-A	GC-motif	CCCCCG	377	6	-	Zea mays	enhancer-like element involved in anoxic specific inducibility
TaARL1b-A	ABRE	ACGTG	753	5	+	Arabidopsis thaliana	cis-acting element involved in the abscisic acid responsiveness
TaARL1b-A	ABRE	ACGTG	996	5	+	Arabidopsis thaliana	cis-acting element involved in the abscisic acid responsiveness
TaARL1b-A	G-box	CACGAC	203	6	+	Zea mays	cis-acting regulatory element involved in light responsiveness
TaARL1b-A	G-box	CACGAC	489	6	-	Zea mays	cis-acting regulatory element involved in light responsiveness
TaARL1b-A	G-box	CACGAC	510	6	+	Zea mays	cis-acting regulatory element involved in light responsiveness
TaARL1b-A	G-box	CACGTC	752	6	-	Zea mays	cis-acting regulatory element involved in light responsiveness
TaARL1b-A	G-box	TACGTG	995	6	+	Arabidopsis thaliana	cis-acting regulatory element involved in light responsiveness
TaARL1b-A	I-box	AGATAAGG	1169	8	-	Triticum aestivum	part of a light responsive element
TaARL1b-A	CGTCA-motif	CGTCA	200	5	+	Hordeum vulgare	cis-acting regulatory element involved in the MeJA-responsiveness
TaARL1b-A	CGTCA-motif	CGTCA	601	5	+	Hordeum vulgare	cis-acting regulatory element involved in the MeJA-responsiveness
TaARL1b-A	CAAT-box	CAAT	141	4	-	Nicotiana glutinosa
TaARL1b-A	CAAT-box	CAAT	350	4	-	Nicotiana glutinosa
TaARL1b-A	CAAT-box	CAAT	727	4	+	Nicotiana glutinosa
TaARL1b-A	CAAT-box	CAAT	1016	4	-	Nicotiana glutinosa
TaARL1b-A	CAAT-box	CAAT	1317	4	-	Nicotiana glutinosa
TaARL1b-A	CAAT-box	CAAT	1386	4	-	Nicotiana glutinosa
TaARL1b-A	CAAT-box	CCAAT	1476	5	-	Arabidopsis thaliana	common cis-acting element in promoter and enhancer regions
TaARL1b-A	CAT-box	GCCACT	313	6	+	Arabidopsis thaliana	cis-acting regulatory element related to meristem expression
TaARL1b-A	CAT-box	GCCACT	1339	6	-	Arabidopsis thaliana	cis-acting regulatory element related to meristem expression
TaARL1b-A	TGACG-motif	TGACG	200	5	-	Hordeum vulgare	cis-acting regulatory element involved in the MeJA-responsiveness
TaARL1b-A	TGACG-motif	TGACG	601	5	-	Hordeum vulgare	cis-acting regulatory element involved in the MeJA-responsiveness
TaARL1b-A	Box 4	ATTAAT	271	6	+	Petroselinum crispum	part of a conserved DNA module involved in light responsiveness
TaARL1b-A	Box 4	ATTAAT	275	6	+	Petroselinum crispum	part of a conserved DNA module involved in light responsiveness
TaARL1b-A	Box 4	ATTAAT	286	6	+	Petroselinum crispum	part of a conserved DNA module involved in light responsiveness
TaARL1b-A	MBS	CAACTG	1148	6	-	Arabidopsis thaliana	MYB binding site involved in drought-inducibility
TaARL1b-A	TGA-element	AACGAC	457	6	+	Brassica oleracea	auxin-responsive element
TaARL1b-A	TGA-element	AACGAC	698	6	-	Brassica oleracea	auxin-responsive element
TaARL1b-A	A-box	CCGTCC	770	6	+	Petroselinum crispum	cis-acting regulatory element
TaARL1b-B	TGACG-motif	TGACG	347	5	+	Hordeum vulgare	cis-acting regulatory element involved in the MeJA-responsiveness
TaARL1b-B	G-Box	CACGTG	1482	6	-	Pisum sativum	cis-acting regulatory element involved in light responsiveness
TaARL1b-B	CAAT-box	CAAAT	263	5	+	Pisum sativum	common cis-acting element in promoter and enhancer regions
TaARL1b-B	CAAT-box	CAAAT	456	5	+	Pisum sativum	common cis-acting element in promoter and enhancer regions
TaARL1b-B	CAAT-box	CAAT	470	4	+	Nicotiana glutinosa
TaARL1b-B	CAAT-box	CAAT	729	4	+	Nicotiana glutinosa
TaARL1b-B	CAAT-box	CAAT	877	4	+	Nicotiana glutinosa
TaARL1b-B	CAAT-box	CCAAT	936	5	+	Arabidopsis thaliana	common cis-acting element in promoter and enhancer regions
TaARL1b-B	CAAT-box	CAAT	937	4	+	Nicotiana glutinosa
TaARL1b-B	CAAT-box	CAAAT	1054	5	-	Pisum sativum	common cis-acting element in promoter and enhancer regions
TaARL1b-B	CAAT-box	CAAAT	1154	5	-	Pisum sativum	common cis-acting element in promoter and enhancer regions
TaARL1b-B	CAAT-box	CAAAT	1174	5	+	Pisum sativum	common cis-acting element in promoter and enhancer regions
TaARL1b-B	CAAT-box	CAAT	1287	4	-	Nicotiana glutinosa
TaARL1b-B	CAAT-box	CAAT	1364	4	-	Nicotiana glutinosa
TaARL1b-B	CAAT-box	CAAT	1378	4	+	Nicotiana glutinosa
TaARL1b-B	CAAT-box	CCAAT	1453	5	-	Arabidopsis thaliana	common cis-acting element in promoter and enhancer regions
TaARL1b-B	CGTCA-motif	CGTCA	347	5	-	Hordeum vulgare	cis-acting regulatory element involved in the MeJA-responsiveness
TaARL1b-B	P-box	CCTTTTG	1403	7	-	Oryza sativa	gibberellin-responsive element
TaARL1b-B	TATA-box	ATATAA	656	6	+	Brassica oleracea	core promoter element around -30 of transcription start
TaARL1b-B	TATA-box	TATA	657	4	+	Arabidopsis thaliana	core promoter element around -30 of transcription start
TaARL1b-B	TATA-box	TATAA	710	5	-	Arabidopsis thaliana	core promoter element around -30 of transcription start
TaARL1b-B	TATA-box	TATA	711	4	+	Arabidopsis thaliana	core promoter element around -30 of transcription start
TaARL1b-B	TATA-box	TATAAAA	889	7	-	Pisum sativum	core promoter element around -30 of transcription start
TaARL1b-B	TATA-box	TATAAA	890	6	-	Helianthus annuus	core promoter element around -30 of transcription start
TaARL1b-B	TATA-box	TATAA	891	5	-	Arabidopsis thaliana	core promoter element around -30 of transcription start
TaARL1b-B	TATA-box	TATA	892	4	-	Arabidopsis thaliana	core promoter element around -30 of transcription start
TaARL1b-B	TATA-box	TATA	912	4	-	Arabidopsis thaliana	core promoter element around -30 of transcription start
TaARL1b-B	TATA-box	TACAAAA	943	7	-	Oryza sativa	core promoter element around -30 of transcription start
TaARL1b-B	TATA-box	TATAA	951	5	-	Arabidopsis thaliana	core promoter element around -30 of transcription start
TaARL1b-B	TATA-box	TATA	952	4	-	Arabidopsis thaliana	core promoter element around -30 of transcription start
TaARL1b-B	TATA-box	TATAAAA	1022	7	-	Pisum sativum	core promoter element around -30 of transcription start
TaARL1b-B	TATA-box	TATAAA	1023	6	-	Helianthus annuus	core promoter element around -30 of transcription start
TaARL1b-B	TATA-box	TATAA	1024	5	-	Arabidopsis thaliana	core promoter element around -30 of transcription start
TaARL1b-B	TATA-box	TATA	1025	4	-	Arabidopsis thaliana	core promoter element around -30 of transcription start
TaARL1b-B	TATA-box	TAAAGATT	1065	8	+	Arabidopsis thaliana	core promoter element around -30 of transcription start
TaARL1b-B	TATA-box	TATATA	1129	6	-	Arabidopsis thaliana	core promoter element around -30 of transcription start
TaARL1b-B	TATA-box	TATA	1131	4	-	Arabidopsis thaliana	core promoter element around -30 of transcription start
TaARL1b-B	TATA-box	TATATAA	1314	7	-	Arabidopsis thaliana	core promoter element around -30 of transcription start
TaARL1b-B	TATA-box	TATATA	1315	6	-	Arabidopsis thaliana	core promoter element around -30 of transcription start
TaARL1b-B	TATA-box	ATATAA	1316	6	+	Brassica oleracea	core promoter element around -30 of transcription start
TaARL1b-B	TATA-box	TATA	1317	4	-	Arabidopsis thaliana	core promoter element around -30 of transcription start
TaARL1b-B	G-box	CACGAC	332	6	-	Zea mays	cis-acting regulatory element involved in light responsiveness
TaARL1b-B	G-box	CACGAC	432	6	+	Zea mays	cis-acting regulatory element involved in light responsiveness
TaARL1b-B	G-box	TACGTG	908	6	-	Arabidopsis thaliana	cis-acting regulatory element involved in light responsiveness
TaARL1b-B	G-box	CACGTG	1482	6	-	Arabidopsis thaliana	cis-acting regulatory element involved in light responsiveness
TaARL1b-B	ABRE	ACGTG	908	5	-	Arabidopsis thaliana	cis-acting element involved in the abscisic acid responsiveness
TaARL1b-B	ABRE	CACGTG	1482	6	-	Arabidopsis thaliana	cis-acting element involved in the abscisic acid responsiveness
TaARL1b-B	ABRE	ACGTG	1483	5	+	Arabidopsis thaliana	cis-acting element involved in the abscisic acid responsiveness
TaARL1b-B	TCA-element	CCATCTTTTT	584	9	-	Nicotiana tabacum	cis-acting element involved in salicylic acid responsiveness
TaARL1b-B	TCA-element	CCATCTTTTT	1410	9	-	Nicotiana tabacum	cis-acting element involved in salicylic acid responsiveness
TaARL1b-B	O2-site	GATGATGTGG	616	9	+	Zea mays	cis-acting regulatory element involved in zein metabolism regulation
TaARL1b-D	CGTCA-motif	CGTCA	497	5	-	Hordeum vulgare	cis-acting regulatory element involved in the MeJA-responsiveness
TaARL1b-D	CGTCA-motif	CGTCA	674	5	-	Hordeum vulgare	cis-acting regulatory element involved in the MeJA-responsiveness
TaARL1b-D	CGTCA-motif	CGTCA	866	5	+	Hordeum vulgare	cis-acting regulatory element involved in the MeJA-responsiveness
TaARL1b-D	CGTCA-motif	CGTCA	892	5	+	Hordeum vulgare	cis-acting regulatory element involved in the MeJA-responsiveness
TaARL1b-D	CCAAT-box	CAACGG	841	6	-	Hordeum vulgare	MYBHv1 binding site
TaARL1b-D	CAAT-box	TGCCAAC	255	7	+	Petunia hybrida	common cis-acting element in promoter and enhancer regions
TaARL1b-D	CAAT-box	CAAT	1039	4	+	Nicotiana glutinosa
TaARL1b-D	CAAT-box	CAAT	1096	4	-	Nicotiana glutinosa
TaARL1b-D	CAAT-box	CAAT	1255	4	+	Nicotiana glutinosa
TaARL1b-D	CAAT-box	CCAAT	1357	5	-	Arabidopsis thaliana	common cis-acting element in promoter and enhancer regions
TaARL1b-D	CAAT-box	CAAT	1374	4	+	Nicotiana glutinosa
TaARL1b-D	CAAT-box	CAAT	1381	4	+	Nicotiana glutinosa
TaARL1b-D	CAAT-box	CAAT	1394	4	+	Nicotiana glutinosa
TaARL1b-D	TGA-element	AACGAC	250	6	-	Brassica oleracea	auxin-responsive element
TaARL1b-D	G-Box	CACGTT	1014	6	-	Pisum sativum	cis-acting regulatory element involved in light responsiveness
TaARL1b-D	TGACG-motif	TGACG	497	5	+	Hordeum vulgare	cis-acting regulatory element involved in the MeJA-responsiveness
TaARL1b-D	TGACG-motif	TGACG	674	5	+	Hordeum vulgare	cis-acting regulatory element involved in the MeJA-responsiveness
TaARL1b-D	TGACG-motif	TGACG	866	5	-	Hordeum vulgare	cis-acting regulatory element involved in the MeJA-responsiveness
TaARL1b-D	TGACG-motif	TGACG	892	5	-	Hordeum vulgare	cis-acting regulatory element involved in the MeJA-responsiveness
TaARL1b-D	MBS	CAACTG	1159	6	-	Arabidopsis thaliana	MYB binding site involved in drought-inducibility
TaARL1b-D	Sp1	GGGCGG	11	6	-	Oryza sativa	light responsive element
TaARL1b-D	ABRE	ACGTG	463	5	-	Arabidopsis thaliana	cis-acting element involved in the abscisic acid responsiveness
TaARL1b-D	ABRE	ACGTG	605	5	+	Arabidopsis thaliana	cis-acting element involved in the abscisic acid responsiveness
TaARL1b-D	ABRE	ACGTG	616	5	-	Arabidopsis thaliana	cis-acting element involved in the abscisic acid responsiveness
TaARL1b-D	ABRE	ACGTG	637	5	-	Arabidopsis thaliana	cis-acting element involved in the abscisic acid responsiveness
TaARL1b-D	ABRE	ACGTG	919	5	+	Arabidopsis thaliana	cis-acting element involved in the abscisic acid responsiveness
TaARL1b-D	ABRE	ACGTG	1015	5	+	Arabidopsis thaliana	cis-acting element involved in the abscisic acid responsiveness
TaARL1b-D	G-box	CACGTC	463	6	+	Zea mays	cis-acting regulatory element involved in light responsiveness
TaARL1b-D	G-box	TACGTG	604	6	+	Arabidopsis thaliana	cis-acting regulatory element involved in light responsiveness
TaARL1b-D	G-box	CACGTC	616	6	+	Zea mays	cis-acting regulatory element involved in light responsiveness
TaARL1b-D	G-box	CACGTC	637	6	+	Zea mays	cis-acting regulatory element involved in light responsiveness
TaARL1b-D	G-box	CACGTC	918	6	-	Zea mays	cis-acting regulatory element involved in light responsiveness
TaARL1b-D	ARE	AAACCA	1468	6	-	Zea mays	cis-acting regulatory element essential for the anaerobic induction
TaARL1b-D	TATA-box	TATACA	725	6	-	Helianthus annuus	core promoter element around -30 of transcription start
TaARL1b-D	TATA-box	TATATA	727	6	+	Arabidopsis thaliana	core promoter element around -30 of transcription start
TaARL1b-D	TATA-box	ATATAA	728	6	+	Brassica oleracea	core promoter element around -30 of transcription start
TaARL1b-D	TATA-box	TATA	729	4	+	Arabidopsis thaliana	core promoter element around -30 of transcription start
TaARL1b-D	TATA-box	TATAA	1107	5	-	Arabidopsis thaliana	core promoter element around -30 of transcription start
TaARL1b-D	TATA-box	TATA	1108	4	-	Arabidopsis thaliana	core promoter element around -30 of transcription start
TaARL1b-D	TATA-box	TATA	1423	4	-	Arabidopsis thaliana	core promoter element around -30 of transcription start
TaARL1c-A	TATA-box	ATATAT	77	6	+	Brassica napus	core promoter element around -30 of transcription start
TaARL1c-A	TATA-box	TATATA	78	6	+	Arabidopsis thaliana	core promoter element around -30 of transcription start
TaARL1c-A	TATA-box	TATA	80	4	+	Arabidopsis thaliana	core promoter element around -30 of transcription start
TaARL1c-A	TATA-box	TACAAAA	161	7	+	Oryza sativa	core promoter element around -30 of transcription start
TaARL1c-A	TATA-box	TATAAAA	1332	7	-	Pisum sativum	core promoter element around -30 of transcription start
TaARL1c-A	TATA-box	TATAAA	1333	6	-	Helianthus annuus	core promoter element around -30 of transcription start
TaARL1c-A	TATA-box	TATATAA	1334	7	-	Arabidopsis thaliana	core promoter element around -30 of transcription start
TaARL1c-A	TATA-box	TATATA	1335	6	-	Arabidopsis thaliana	core promoter element around -30 of transcription start
TaARL1c-A	TATA-box	TATA	1337	4	-	Arabidopsis thaliana	core promoter element around -30 of transcription start
TaARL1c-A	TATA-box	TATA	1378	4	-	Arabidopsis thaliana	core promoter element around -30 of transcription start
TaARL1c-A	TATA-box	TACAAAA	1448	7	+	Oryza sativa	core promoter element around -30 of transcription start
TaARL1c-A	G-box	CACGAC	18	6	+	Zea mays	cis-acting regulatory element involved in light responsiveness
TaARL1c-A	G-box	CACGTC	1280	6	-	Zea mays	cis-acting regulatory element involved in light responsiveness
TaARL1c-A	G-box	TACGTG	1444	6	-	Arabidopsis thaliana	cis-acting regulatory element involved in light responsiveness
TaARL1c-A	ABRE	ACGTG	1281	5	+	Arabidopsis thaliana	cis-acting element involved in the abscisic acid responsiveness
TaARL1c-A	ABRE	ACGTG	1444	5	-	Arabidopsis thaliana	cis-acting element involved in the abscisic acid responsiveness
TaARL1c-A	GC-motif	CCCCCG	844	6	-	Zea mays	enhancer-like element involved in anoxic specific inducibility
TaARL1c-A	Sp1	GGGCGG	990	6	+	Oryza sativa	light responsive element
TaARL1c-A	Sp1	GGGCGG	1004	6	+	Oryza sativa	light responsive element
TaARL1c-A	Sp1	GGGCGG	1012	6	+	Oryza sativa	light responsive element
TaARL1c-A	Sp1	GGGCGG	1022	6	+	Oryza sativa	light responsive element
TaARL1c-A	TGACG-motif	TGACG	365	5	-	Hordeum vulgare	cis-acting regulatory element involved in the MeJA-responsiveness
TaARL1c-A	CAAT-box	CAAAT	23	5	+	Pisum sativum	common cis-acting element in promoter and enhancer regions
TaARL1c-A	CAAT-box	CAAAT	60	5	+	Pisum sativum	common cis-acting element in promoter and enhancer regions
TaARL1c-A	CAAT-box	CCAAT	74	5	+	Arabidopsis thaliana	common cis-acting element in promoter and enhancer regions
TaARL1c-A	CAAT-box	CAAT	75	4	+	Nicotiana glutinosa
TaARL1c-A	CAAT-box	CAAT	174	4	+	Nicotiana glutinosa
TaARL1c-A	CAAT-box	CAAT	258	4	-	Nicotiana glutinosa
TaARL1c-A	CAAT-box	CAAT	412	4	-	Nicotiana glutinosa
TaARL1c-A	CAAT-box	CAAT	424	4	+	Nicotiana glutinosa
TaARL1c-A	CAAT-box	CAAT	439	4	+	Nicotiana glutinosa
TaARL1c-A	CAAT-box	CAAAT	908	5	+	Pisum sativum	common cis-acting element in promoter and enhancer regions
TaARL1c-A	CAAT-box	CAAAT	1154	5	-	Pisum sativum	common cis-acting element in promoter and enhancer regions
TaARL1c-A	CAAT-box	CAAAT	1269	5	+	Pisum sativum	common cis-acting element in promoter and enhancer regions
TaARL1c-A	CAAT-box	CAAAT	1272	5	-	Pisum sativum	common cis-acting element in promoter and enhancer regions
TaARL1c-A	CAAT-box	CAAT	1470	4	+	Nicotiana glutinosa
TaARL1c-A	CAAT-box	CAAT	1478	4	-	Nicotiana glutinosa
TaARL1c-A	CCAAT-box	CAACGG	476	6	+	Hordeum vulgare	MYBHv1 binding site
TaARL1c-A	CGTCA-motif	CGTCA	365	5	+	Hordeum vulgare	cis-acting regulatory element involved in the MeJA-responsiveness
TaARL1c-A	LTR	CCGAAA	502	6	-	Hordeum vulgare	cis-acting element involved in low-temperature responsiveness
TaARL1c-B	CAT-box	GCCACT	824	6	+	Arabidopsis thaliana	cis-acting regulatory element related to meristem expression
TaARL1c-B	CGTCA-motif	CGTCA	50	5	-	Hordeum vulgare	cis-acting regulatory element involved in the MeJA-responsiveness
TaARL1c-B	CGTCA-motif	CGTCA	323	5	-	Hordeum vulgare	cis-acting regulatory element involved in the MeJA-responsiveness
TaARL1c-B	CGTCA-motif	CGTCA	913	5	-	Hordeum vulgare	cis-acting regulatory element involved in the MeJA-responsiveness
TaARL1c-B	CGTCA-motif	CGTCA	1272	5	-	Hordeum vulgare	cis-acting regulatory element involved in the MeJA-responsiveness
TaARL1c-B	I-box	TGATAATGT	1437	9	-	Solanum tuberosum	part of a light responsive element
TaARL1c-B	CAAT-box	CAAT	235	4	-	Nicotiana glutinosa
TaARL1c-B	CAAT-box	CAAT	321	4	-	Nicotiana glutinosa
TaARL1c-B	CAAT-box	CAAT	625	4	-	Nicotiana glutinosa
TaARL1c-B	CAAT-box	CAAT	701	4	-	Nicotiana glutinosa
TaARL1c-B	CAAT-box	TGCCAAC	780	7	-	Petunia hybrida	common cis-acting element in promoter and enhancer regions
TaARL1c-B	CAAT-box	CAAT	833	4	-	Nicotiana glutinosa
TaARL1c-B	CAAT-box	CAAT	841	4	+	Nicotiana glutinosa
TaARL1c-B	CAAT-box	CAAT	910	4	+	Nicotiana glutinosa
TaARL1c-B	CAAT-box	CAAT	948	4	+	Nicotiana glutinosa
TaARL1c-B	CAAT-box	CCAAT	950	5	-	Arabidopsis thaliana	common cis-acting element in promoter and enhancer regions
TaARL1c-B	CAAT-box	CAAT	1000	4	+	Nicotiana glutinosa
TaARL1c-B	CAAT-box	CAAT	1077	4	-	Nicotiana glutinosa
TaARL1c-B	CAAT-box	CCAAT	1092	5	-	Arabidopsis thaliana	common cis-acting element in promoter and enhancer regions
TaARL1c-B	CAAT-box	CAAT	1140	4	+	Nicotiana glutinosa
TaARL1c-B	CAAT-box	CAAAT	1287	5	+	Pisum sativum	common cis-acting element in promoter and enhancer regions
TaARL1c-B	CAAT-box	CCAAT	1294	5	-	Arabidopsis thaliana	common cis-acting element in promoter and enhancer regions
TaARL1c-B	CAAT-box	CCAAT	1416	5	+	Arabidopsis thaliana	common cis-acting element in promoter and enhancer regions
TaARL1c-B	CAAT-box	CAAT	1417	4	+	Nicotiana glutinosa
TaARL1c-B	CAAT-box	CAAAT	1429	5	+	Pisum sativum	common cis-acting element in promoter and enhancer regions
TaARL1c-B	TGA-element	AACGAC	599	6	+	Brassica oleracea	auxin-responsive element
TaARL1c-B	TGA-element	AACGAC	637	6	+	Brassica oleracea	auxin-responsive element
TaARL1c-B	TGACG-motif	TGACG	50	5	+	Hordeum vulgare	cis-acting regulatory element involved in the MeJA-responsiveness
TaARL1c-B	TGACG-motif	TGACG	323	5	+	Hordeum vulgare	cis-acting regulatory element involved in the MeJA-responsiveness
TaARL1c-B	TGACG-motif	TGACG	913	5	+	Hordeum vulgare	cis-acting regulatory element involved in the MeJA-responsiveness
TaARL1c-B	TGACG-motif	TGACG	1272	5	+	Hordeum vulgare	cis-acting regulatory element involved in the MeJA-responsiveness
TaARL1c-B	O2-site	GTTGACGTGA	22	9	+	Zea mays	cis-acting regulatory element involved in zein metabolism regulation
TaARL1c-B	ABRE	CGTACGTGCA	221	9	-	Hordeum vulgare	cis-acting element involved in the abscisic acid responsiveness
TaARL1c-B	ABRE	ACGTG	413	5	+	Arabidopsis thaliana	cis-acting element involved in the abscisic acid responsiveness
TaARL1c-B	ABRE	ACGTG	659	5	+	Arabidopsis thaliana	cis-acting element involved in the abscisic acid responsiveness
TaARL1c-B	G-box	CACGTC	412	6	-	Zea mays	cis-acting regulatory element involved in light responsiveness
TaARL1c-B	G-box	CACGAC	422	6	-	Zea mays	cis-acting regulatory element involved in light responsiveness
TaARL1c-B	G-box	CACGTC	658	6	-	Zea mays	cis-acting regulatory element involved in light responsiveness
TaARL1c-B	ARE	AAACCA	773	6	+	Zea mays	cis-acting regulatory element essential for the anaerobic induction
TaARL1c-B	ARE	AAACCA	1413	6	+	Zea mays	cis-acting regulatory element essential for the anaerobic induction
TaARL1c-B	TATA-box	TATATAA	1225	7	-	Arabidopsis thaliana	core promoter element around -30 of transcription start
TaARL1c-B	TATA-box	TATATA	1226	6	-	Arabidopsis thaliana	core promoter element around -30 of transcription start
TaARL1c-B	TATA-box	TATA	1228	4	-	Arabidopsis thaliana	core promoter element around -30 of transcription start
TaARL1c-B	TATA-box	ATATAA	1432	6	+	Brassica oleracea	core promoter element around -30 of transcription start
TaARL1c-B	TATA-box	TATA	1433	4	-	Arabidopsis thaliana	core promoter element around -30 of transcription start
TaARL1c-B	TCT-motif	TCTTAC	482	6	-	Arabidopsis thaliana	part of a light responsive element
TaARL1c-D	TATA-box	TATATAA	1214	7	-	Arabidopsis thaliana	core promoter element around -30 of transcription start
TaARL1c-D	TATA-box	TATATA	1215	6	-	Arabidopsis thaliana	core promoter element around -30 of transcription start
TaARL1c-D	TATA-box	TATA	1217	4	-	Arabidopsis thaliana	core promoter element around -30 of transcription start
TaARL1c-D	TATA-box	ATTATA	1416	6	+	Brassica napus	core promoter element around -30 of transcription start
TaARL1c-D	TATA-box	TATAA	1417	5	-	Arabidopsis thaliana	core promoter element around -30 of transcription start
TaARL1c-D	TATA-box	TATA	1418	4	-	Arabidopsis thaliana	core promoter element around -30 of transcription start
TaARL1c-D	TCT-motif	TCTTAC	486	6	-	Arabidopsis thaliana	part of a light responsive element
TaARL1c-D	P-box	CCTTTTG	1112	7	-	Oryza sativa	gibberellin-responsive element
TaARL1c-D	ABRE	AACCCGG	269	7	-	Arabidopsis thaliana	cis-acting element involved in the abscisic acid responsiveness
TaARL1c-D	ABRE	ACGTG	417	5	+	Arabidopsis thaliana	cis-acting element involved in the abscisic acid responsiveness
TaARL1c-D	ABRE	ACGTG	663	5	+	Arabidopsis thaliana	cis-acting element involved in the abscisic acid responsiveness
TaARL1c-D	G-box	CACGTC	416	6	-	Zea mays	cis-acting regulatory element involved in light responsiveness
TaARL1c-D	G-box	CACGTC	662	6	-	Zea mays	cis-acting regulatory element involved in light responsiveness
TaARL1c-D	ARE	AAACCA	595	6	-	Zea mays	cis-acting regulatory element essential for the anaerobic induction
TaARL1c-D	ARE	AAACCA	777	6	+	Zea mays	cis-acting regulatory element essential for the anaerobic induction
TaARL1c-D	ARE	AAACCA	1392	6	+	Zea mays	cis-acting regulatory element essential for the anaerobic induction
TaARL1c-D	TCA-element	CCATCTTTTT	1019	9	+	Nicotiana tabacum	cis-acting element involved in salicylic acid responsiveness
TaARL1c-D	Sp1	GGGCGG	1117	6	+	Oryza sativa	light responsive element
TaARL1c-D	O2-site	GATGATGTGG	28	9	+	Zea mays	cis-acting regulatory element involved in zein metabolism regulation
TaARL1c-D	TGACG-motif	TGACG	56	5	+	Hordeum vulgare	cis-acting regulatory element involved in the MeJA-responsiveness
TaARL1c-D	TGACG-motif	TGACG	64	5	+	Hordeum vulgare	cis-acting regulatory element involved in the MeJA-responsiveness
TaARL1c-D	TGACG-motif	TGACG	161	5	+	Hordeum vulgare	cis-acting regulatory element involved in the MeJA-responsiveness
TaARL1c-D	TGACG-motif	TGACG	327	5	+	Hordeum vulgare	cis-acting regulatory element involved in the MeJA-responsiveness
TaARL1c-D	TGACG-motif	TGACG	914	5	+	Hordeum vulgare	cis-acting regulatory element involved in the MeJA-responsiveness
TaARL1c-D	TGACG-motif	TGACG	1251	5	+	Hordeum vulgare	cis-acting regulatory element involved in the MeJA-responsiveness
TaARL1c-D	CGTCA-motif	CGTCA	56	5	-	Hordeum vulgare	cis-acting regulatory element involved in the MeJA-responsiveness
TaARL1c-D	CGTCA-motif	CGTCA	64	5	-	Hordeum vulgare	cis-acting regulatory element involved in the MeJA-responsiveness
TaARL1c-D	CGTCA-motif	CGTCA	161	5	-	Hordeum vulgare	cis-acting regulatory element involved in the MeJA-responsiveness
TaARL1c-D	CGTCA-motif	CGTCA	327	5	-	Hordeum vulgare	cis-acting regulatory element involved in the MeJA-responsiveness
TaARL1c-D	CGTCA-motif	CGTCA	914	5	-	Hordeum vulgare	cis-acting regulatory element involved in the MeJA-responsiveness
TaARL1c-D	CGTCA-motif	CGTCA	1251	5	-	Hordeum vulgare	cis-acting regulatory element involved in the MeJA-responsiveness
TaARL1c-D	I-box	cGATAAGGCG	605	9	+	Zea mays	part of a light responsive element
TaARL1c-D	CAAT-box	CAAT	178	4	+	Nicotiana glutinosa
TaARL1c-D	CAAT-box	CAAT	239	4	-	Nicotiana glutinosa
TaARL1c-D	CAAT-box	CAAT	325	4	-	Nicotiana glutinosa
TaARL1c-D	CAAT-box	CAAT	629	4	-	Nicotiana glutinosa
TaARL1c-D	CAAT-box	CAAT	705	4	-	Nicotiana glutinosa
TaARL1c-D	CAAT-box	CAAT	751	4	-	Nicotiana glutinosa
TaARL1c-D	CAAT-box	TGCCAAC	784	7	-	Petunia hybrida	common cis-acting element in promoter and enhancer regions
TaARL1c-D	CAAT-box	CAAT	837	4	-	Nicotiana glutinosa
TaARL1c-D	CAAT-box	CAAT	845	4	+	Nicotiana glutinosa
TaARL1c-D	CAAT-box	CAAT	911	4	+	Nicotiana glutinosa
TaARL1c-D	CAAT-box	CAAT	949	4	+	Nicotiana glutinosa
TaARL1c-D	CAAT-box	CCAAT	951	5	-	Arabidopsis thaliana	common cis-acting element in promoter and enhancer regions
TaARL1c-D	CAAT-box	CAAT	1001	4	+	Nicotiana glutinosa
TaARL1c-D	CAAT-box	CAAT	1078	4	-	Nicotiana glutinosa
TaARL1c-D	CAAT-box	CCAAT	1093	5	-	Arabidopsis thaliana	common cis-acting element in promoter and enhancer regions
TaARL1c-D	CAAT-box	CAAT	1157	4	+	Nicotiana glutinosa
TaARL1c-D	CAAT-box	CAAT	1227	4	+	Nicotiana glutinosa
TaARL1c-D	CAAT-box	CAAAT	1273	5	-	Pisum sativum	common cis-acting element in promoter and enhancer regions
TaARL1c-D	CAAT-box	CCAAT	1395	5	+	Arabidopsis thaliana	common cis-acting element in promoter and enhancer regions
TaARL1c-D	CAAT-box	CAAT	1396	4	+	Nicotiana glutinosa
TaARL1c-D	CAAT-box	CAAAT	1408	5	+	Pisum sativum	common cis-acting element in promoter and enhancer regions
TaARL1c-D	CAAT-box	CCAAT	1482	5	-	Arabidopsis thaliana	common cis-acting element in promoter and enhancer regions
TaARL1c-D	CAAT-box	CCAAT	1493	5	+	Arabidopsis thaliana	common cis-acting element in promoter and enhancer regions
TaARL1c-D	CAAT-box	CAAT	1494	4	+	Nicotiana glutinosa
TaARL1c-D	CAT-box	GCCACT	828	6	+	Arabidopsis thaliana	cis-acting regulatory element related to meristem expression
TaARL1d-A	CCAAT-box	CAACGG	718	6	-	Hordeum vulgare	MYBHv1 binding site
TaARL1d-A	CAAT-box	CAAT	46	4	-	Nicotiana glutinosa
TaARL1d-A	CAAT-box	CAAAT	118	5	-	Pisum sativum	common cis-acting element in promoter and enhancer regions
TaARL1d-A	CAAT-box	CAAT	145	4	+	Nicotiana glutinosa
TaARL1d-A	CAAT-box	CAAT	253	4	-	Nicotiana glutinosa
TaARL1d-A	CAAT-box	CCAAT	282	5	-	Arabidopsis thaliana	common cis-acting element in promoter and enhancer regions
TaARL1d-A	CAAT-box	CAAT	316	4	-	Nicotiana glutinosa
TaARL1d-A	CAAT-box	CAAT	349	4	+	Nicotiana glutinosa
TaARL1d-A	CAAT-box	CAAT	357	4	+	Nicotiana glutinosa
TaARL1d-A	CAAT-box	CCAAT	397	5	+	Arabidopsis thaliana	common cis-acting element in promoter and enhancer regions
TaARL1d-A	CAAT-box	CAAT	398	4	+	Nicotiana glutinosa
TaARL1d-A	CAAT-box	CAAAT	456	5	+	Pisum sativum	common cis-acting element in promoter and enhancer regions
TaARL1d-A	CAAT-box	CAAAT	468	5	+	Pisum sativum	common cis-acting element in promoter and enhancer regions
TaARL1d-A	CAAT-box	CAAT	533	4	-	Nicotiana glutinosa
TaARL1d-A	CAAT-box	CAAT	546	4	-	Nicotiana glutinosa
TaARL1d-A	CAAT-box	CAAAT	641	5	-	Pisum sativum	common cis-acting element in promoter and enhancer regions
TaARL1d-A	CAAT-box	CAAT	672	4	+	Nicotiana glutinosa
TaARL1d-A	CAAT-box	CAAAT	711	5	-	Pisum sativum	common cis-acting element in promoter and enhancer regions
TaARL1d-A	CAAT-box	CAAT	735	4	+	Nicotiana glutinosa
TaARL1d-A	CAAT-box	CAAT	760	4	+	Nicotiana glutinosa
TaARL1d-A	CAAT-box	CAAT	785	4	+	Nicotiana glutinosa
TaARL1d-A	CAAT-box	CAAT	806	4	+	Nicotiana glutinosa
TaARL1d-A	CGTCA-motif	CGTCA	131	5	+	Hordeum vulgare	cis-acting regulatory element involved in the MeJA-responsiveness
TaARL1d-A	CGTCA-motif	CGTCA	354	5	+	Hordeum vulgare	cis-acting regulatory element involved in the MeJA-responsiveness
TaARL1d-A	G-Box	CACGTT	1292	6	+	Pisum sativum	cis-acting regulatory element involved in light responsiveness
TaARL1d-A	TGA-element	AACGAC	920	6	+	Brassica oleracea	auxin-responsive element
TaARL1d-A	TGA-element	AACGAC	1048	6	-	Brassica oleracea	auxin-responsive element
TaARL1d-A	AuxRR-core	GGTCCAT	4	7	+	Nicotiana tabacum	cis-acting regulatory element involved in auxin responsiveness
TaARL1d-A	AuxRR-core	GGTCCAT	1104	7	+	Nicotiana tabacum	cis-acting regulatory element involved in auxin responsiveness
TaARL1d-A	MBS	CAACTG	160	6	+	Arabidopsis thaliana	MYB binding site involved in drought-inducibility
TaARL1d-A	TGACG-motif	TGACG	131	5	-	Hordeum vulgare	cis-acting regulatory element involved in the MeJA-responsiveness
TaARL1d-A	TGACG-motif	TGACG	354	5	-	Hordeum vulgare	cis-acting regulatory element involved in the MeJA-responsiveness
TaARL1d-A	Box 4	ATTAAT	1471	6	-	Petroselinum crispum	part of a conserved DNA module involved in light responsiveness
TaARL1d-A	TCA-element	CCATCTTTTT	538	9	+	Nicotiana tabacum	cis-acting element involved in salicylic acid responsiveness
TaARL1d-A	ARE	AAACCA	1387	6	+	Zea mays	cis-acting regulatory element essential for the anaerobic induction
TaARL1d-A	G-box	CACGTC	129	6	+	Zea mays	cis-acting regulatory element involved in light responsiveness
TaARL1d-A	G-box	CACGAC	1127	6	+	Zea mays	cis-acting regulatory element involved in light responsiveness
TaARL1d-A	GC-motif	CCCCCG	1417	6	+	Zea mays	enhancer-like element involved in anoxic specific inducibility
TaARL1d-A	ABRE	ACGTG	129	5	-	Arabidopsis thaliana	cis-acting element involved in the abscisic acid responsiveness
TaARL1d-A	ABRE	GCAACGTGTC	1290	9	-	Hordeum vulgare	cis-acting element involved in the abscisic acid responsiveness
TaARL1d-A	ABRE	ACGTG	1292	5	-	Arabidopsis thaliana	cis-acting element involved in the abscisic acid responsiveness
TaARL1d-A	P-box	CCTTTTG	1347	7	-	Oryza sativa	gibberellin-responsive element
TaARL1d-A	TCT-motif	TCTTAC	579	6	-	Arabidopsis thaliana	part of a light responsive element
TaARL1d-A	TCT-motif	TCTTAC	745	6	-	Arabidopsis thaliana	part of a light responsive element
TaARL1d-A	TATA-box	TATACA	22	6	-	Helianthus annuus	core promoter element around -30 of transcription start
TaARL1d-A	TATA-box	TATA	24	4	+	Arabidopsis thaliana	core promoter element around -30 of transcription start
TaARL1d-A	TATA-box	TATA	501	4	+	Arabidopsis thaliana	core promoter element around -30 of transcription start
TaARL1d-A	TATA-box	TACAAAA	596	7	+	Oryza sativa	core promoter element around -30 of transcription start
TaARL1d-A	TATA-box	ATATAT	674	6	+	Brassica napus	core promoter element around -30 of transcription start
TaARL1d-A	TATA-box	TATATA	675	6	+	Arabidopsis thaliana	core promoter element around -30 of transcription start
TaARL1d-A	TATA-box	TATA	677	4	+	Arabidopsis thaliana	core promoter element around -30 of transcription start
TaARL1d-A	TATA-box	TATA	1246	4	-	Arabidopsis thaliana	core promoter element around -30 of transcription start
TaARL1d-B	CGTCA-motif	CGTCA	293	5	+	Hordeum vulgare	cis-acting regulatory element involved in the MeJA-responsiveness
TaARL1d-B	CGTCA-motif	CGTCA	873	5	-	Hordeum vulgare	cis-acting regulatory element involved in the MeJA-responsiveness
TaARL1d-B	CGTCA-motif	CGTCA	928	5	+	Hordeum vulgare	cis-acting regulatory element involved in the MeJA-responsiveness
TaARL1d-B	CAAT-box	CAAAT	113	5	-	Pisum sativum	common cis-acting element in promoter and enhancer regions
TaARL1d-B	CAAT-box	CAAT	152	4	-	Nicotiana glutinosa
TaARL1d-B	CAAT-box	CAAT	204	4	-	Nicotiana glutinosa
TaARL1d-B	CAAT-box	CAAT	391	4	-	Nicotiana glutinosa
TaARL1d-B	CAAT-box	CCAAT	532	5	-	Arabidopsis thaliana	common cis-acting element in promoter and enhancer regions
TaARL1d-B	CAAT-box	CAAAT	548	5	+	Pisum sativum	common cis-acting element in promoter and enhancer regions
TaARL1d-B	CAAT-box	CCAAT	629	5	+	Arabidopsis thaliana	common cis-acting element in promoter and enhancer regions
TaARL1d-B	CAAT-box	CAAT	630	4	+	Nicotiana glutinosa
TaARL1d-B	CAAT-box	CAAAT	689	5	+	Pisum sativum	common cis-acting element in promoter and enhancer regions
TaARL1d-B	CAAT-box	CAAT	694	4	-	Nicotiana glutinosa
TaARL1d-B	CAAT-box	CAAT	757	4	-	Nicotiana glutinosa
TaARL1d-B	CAAT-box	CAAT	868	4	-	Nicotiana glutinosa
TaARL1d-B	CAAT-box	CAAT	960	4	+	Nicotiana glutinosa
TaARL1d-B	CAAT-box	CAAT	1298	4	-	Nicotiana glutinosa
TaARL1d-B	CAAT-box	CAAT	1311	4	-	Nicotiana glutinosa
TaARL1d-B	CAAT-box	CAAAT	1321	5	+	Pisum sativum	common cis-acting element in promoter and enhancer regions
TaARL1d-B	CAAT-box	CAAT	1350	4	+	Nicotiana glutinosa
TaARL1d-B	CAAT-box	CAAAT	1406	5	-	Pisum sativum	common cis-acting element in promoter and enhancer regions
TaARL1d-B	CAAT-box	CCAAT	1427	5	+	Arabidopsis thaliana	common cis-acting element in promoter and enhancer regions
TaARL1d-B	CAAT-box	CAAT	1428	4	+	Nicotiana glutinosa
TaARL1d-B	CAAT-box	CAAAT	1476	5	-	Pisum sativum	common cis-acting element in promoter and enhancer regions
TaARL1d-B	G-Box	CACGTT	1102	6	-	Pisum sativum	cis-acting regulatory element involved in light responsiveness
TaARL1d-B	A-box	CCGTCC	1092	6	-	Petroselinum crispum	cis-acting regulatory element
TaARL1d-B	TGACG-motif	TGACG	293	5	-	Hordeum vulgare	cis-acting regulatory element involved in the MeJA-responsiveness
TaARL1d-B	TGACG-motif	TGACG	873	5	+	Hordeum vulgare	cis-acting regulatory element involved in the MeJA-responsiveness
TaARL1d-B	TGACG-motif	TGACG	928	5	-	Hordeum vulgare	cis-acting regulatory element involved in the MeJA-responsiveness
TaARL1d-B	Box 4	ATTAAT	1435	6	-	Petroselinum crispum	part of a conserved DNA module involved in light responsiveness
TaARL1d-B	TCA-element	CCATCTTTTT	1303	9	+	Nicotiana tabacum	cis-acting element involved in salicylic acid responsiveness
TaARL1d-B	Sp1	GGGCGG	1081	6	+	Oryza sativa	light responsive element
TaARL1d-B	ABRE	ACGTG	1103	5	+	Arabidopsis thaliana	cis-acting element involved in the abscisic acid responsiveness
TaARL1d-B	TCT-motif	TCTTAC	1344	6	-	Arabidopsis thaliana	part of a light responsive element
TaARL1d-B	TATA-box	TATAA	221	5	-	Arabidopsis thaliana	core promoter element around -30 of transcription start
TaARL1d-B	TATA-box	TATA	222	4	+	Arabidopsis thaliana	core promoter element around -30 of transcription start
TaARL1d-B	TATA-box	ATATAA	314	6	+	Brassica oleracea	core promoter element around -30 of transcription start
TaARL1d-B	TATA-box	TATA	315	4	+	Arabidopsis thaliana	core promoter element around -30 of transcription start
TaARL1d-B	TATA-box	TATATA	1188	6	-	Arabidopsis thaliana	core promoter element around -30 of transcription start
TaARL1d-B	TATA-box	ATATAT	1189	6	-	Brassica napus	core promoter element around -30 of transcription start
TaARL1d-B	TATA-box	TATATA	1190	6	-	Arabidopsis thaliana	core promoter element around -30 of transcription start
TaARL1d-B	TATA-box	TATA	1192	4	-	Arabidopsis thaliana	core promoter element around -30 of transcription start
TaARL1d-B	TATA-box	TATA	1266	4	-	Arabidopsis thaliana	core promoter element around -30 of transcription start
TaARL1d-B	TATA-box	TACAAAA	1361	7	+	Oryza sativa	core promoter element around -30 of transcription start
TaARL1d-D	A-box	CCGTCC	892	6	-	Petroselinum crispum	cis-acting regulatory element
TaARL1d-D	TGACG-motif	TGACG	717	5	-	Hordeum vulgare	cis-acting regulatory element involved in the MeJA-responsiveness
TaARL1d-D	TGACG-motif	TGACG	727	5	-	Hordeum vulgare	cis-acting regulatory element involved in the MeJA-responsiveness
TaARL1d-D	Box 4	ATTAAT	1203	6	-	Petroselinum crispum	part of a conserved DNA module involved in light responsiveness
TaARL1d-D	CGTCA-motif	CGTCA	717	5	+	Hordeum vulgare	cis-acting regulatory element involved in the MeJA-responsiveness
TaARL1d-D	CGTCA-motif	CGTCA	727	5	+	Hordeum vulgare	cis-acting regulatory element involved in the MeJA-responsiveness
TaARL1d-D	LTR	CCGAAA	1372	6	+	Hordeum vulgare	cis-acting element involved in low-temperature responsiveness
TaARL1d-D	CAAT-box	CAAT	85	4	+	Nicotiana glutinosa
TaARL1d-D	CAAT-box	CAAT	87	4	-	Nicotiana glutinosa
TaARL1d-D	CAAT-box	CAAT	153	4	+	Nicotiana glutinosa
TaARL1d-D	CAAT-box	CAAAT	159	5	-	Pisum sativum	common cis-acting element in promoter and enhancer regions
TaARL1d-D	CAAT-box	CAAAT	201	5	+	Pisum sativum	common cis-acting element in promoter and enhancer regions
TaARL1d-D	CAAT-box	CAAT	286	4	-	Nicotiana glutinosa
TaARL1d-D	CAAT-box	CCAAT	315	5	-	Arabidopsis thaliana	common cis-acting element in promoter and enhancer regions
TaARL1d-D	CAAT-box	CCAAT	339	5	-	Arabidopsis thaliana	common cis-acting element in promoter and enhancer regions
TaARL1d-D	CAAT-box	CAAT	347	4	-	Nicotiana glutinosa
TaARL1d-D	CAAT-box	CCAAT	429	5	+	Arabidopsis thaliana	common cis-acting element in promoter and enhancer regions
TaARL1d-D	CAAT-box	CAAT	430	4	+	Nicotiana glutinosa
TaARL1d-D	CAAT-box	CAAAT	488	5	+	Pisum sativum	common cis-acting element in promoter and enhancer regions
TaARL1d-D	CAAT-box	CAAT	554	4	+	Nicotiana glutinosa
TaARL1d-D	CAAT-box	CAAT	556	4	-	Nicotiana glutinosa
TaARL1d-D	CAAT-box	CCAAT	631	5	-	Arabidopsis thaliana	common cis-acting element in promoter and enhancer regions
TaARL1d-D	CAAT-box	CAAT	667	4	-	Nicotiana glutinosa
TaARL1d-D	CAAT-box	CAAT	759	4	+	Nicotiana glutinosa
TaARL1d-D	CAAT-box	CAAT	1081	4	-	Nicotiana glutinosa
TaARL1d-D	CAAT-box	CAAT	1094	4	-	Nicotiana glutinosa
TaARL1d-D	CAAT-box	CAAAT	1104	5	+	Pisum sativum	common cis-acting element in promoter and enhancer regions
TaARL1d-D	CAAT-box	CAAAT	1174	5	-	Pisum sativum	common cis-acting element in promoter and enhancer regions
TaARL1d-D	CAAT-box	CCAAT	1195	5	+	Arabidopsis thaliana	common cis-acting element in promoter and enhancer regions
TaARL1d-D	CAAT-box	CAAT	1196	4	+	Nicotiana glutinosa
TaARL1d-D	CAAT-box	CAAAT	1269	5	+	Pisum sativum	common cis-acting element in promoter and enhancer regions
TaARL1d-D	CAAT-box	CAAT	1285	4	+	Nicotiana glutinosa
TaARL1d-D	CAAT-box	CAAT	1306	4	+	Nicotiana glutinosa
TaARL1d-D	CAAT-box	CAAT	1308	4	-	Nicotiana glutinosa
TaARL1d-D	CAAT-box	CAACCAACTCC	1453	10	+	Arabidopsis thaliana	common cis-acting element in promoter and enhancer regions
TaARL1d-D	CCAAT-box	CAACGG	1252	6	-	Hordeum vulgare	MYBHv1 binding site
TaARL1d-D	ARE	AAACCA	1449	6	+	Zea mays	cis-acting regulatory element essential for the anaerobic induction
TaARL1d-D	TATA-box	TATACA	63	6	-	Helianthus annuus	core promoter element around -30 of transcription start
TaARL1d-D	TATA-box	TATA	65	4	+	Arabidopsis thaliana	core promoter element around -30 of transcription start
TaARL1d-D	TATA-box	TATATA	971	6	-	Arabidopsis thaliana	core promoter element around -30 of transcription start
TaARL1d-D	TATA-box	ATATAT	972	6	-	Brassica napus	core promoter element around -30 of transcription start
TaARL1d-D	TATA-box	TATATA	973	6	-	Arabidopsis thaliana	core promoter element around -30 of transcription start
TaARL1d-D	TATA-box	TATA	975	4	-	Arabidopsis thaliana	core promoter element around -30 of transcription start
TaARL1d-D	TATA-box	TATA	1049	4	-	Arabidopsis thaliana	core promoter element around -30 of transcription start
TaARL1d-D	TATA-box	TACAAAA	1144	7	+	Oryza sativa	core promoter element around -30 of transcription start
TaARL1d-D	TCT-motif	TCTTAC	1127	6	-	Arabidopsis thaliana	part of a light responsive element
TaARL1d-D	P-box	CCTTTTG	1409	7	-	Oryza sativa	gibberellin-responsive element
TaARL1d-D	Sp1	GGGCGG	697	6	+	Oryza sativa	light responsive element
TaARL1e-A	I-box	AGATAAGG	341	8	-	Triticum aestivum	part of a light responsive element
TaARL1e-A	CGTCA-motif	CGTCA	262	5	-	Hordeum vulgare	cis-acting regulatory element involved in the MeJA-responsiveness
TaARL1e-A	CGTCA-motif	CGTCA	917	5	+	Hordeum vulgare	cis-acting regulatory element involved in the MeJA-responsiveness
TaARL1e-A	CGTCA-motif	CGTCA	1169	5	-	Hordeum vulgare	cis-acting regulatory element involved in the MeJA-responsiveness
TaARL1e-A	CAAT-box	CAAT	2	4	+	Nicotiana glutinosa
TaARL1e-A	CAAT-box	CAAT	127	4	+	Nicotiana glutinosa
TaARL1e-A	CAAT-box	CAAT	134	4	+	Nicotiana glutinosa
TaARL1e-A	CAAT-box	CAAAT	136	5	-	Pisum sativum	common cis-acting element in promoter and enhancer regions
TaARL1e-A	CAAT-box	CAAT	189	4	+	Nicotiana glutinosa
TaARL1e-A	CAAT-box	CCAAT	193	5	-	Arabidopsis thaliana	common cis-acting element in promoter and enhancer regions
TaARL1e-A	CAAT-box	CCCAATTT	237	8	-	Arabidopsis thaliana	common cis-acting element in promoter and enhancer regions
TaARL1e-A	CAAT-box	CCAAT	239	5	-	Arabidopsis thaliana	common cis-acting element in promoter and enhancer regions
TaARL1e-A	CAAT-box	CCCAATTT	281	8	+	Arabidopsis thaliana	common cis-acting element in promoter and enhancer regions
TaARL1e-A	CAAT-box	CCAAT	282	5	+	Arabidopsis thaliana	common cis-acting element in promoter and enhancer regions
TaARL1e-A	CAAT-box	CAAT	283	4	+	Nicotiana glutinosa
TaARL1e-A	CAAT-box	CAAT	350	4	-	Nicotiana glutinosa
TaARL1e-A	CAAT-box	CCAAT	397	5	-	Arabidopsis thaliana	common cis-acting element in promoter and enhancer regions
TaARL1e-A	CAAT-box	CCAAT	425	5	-	Arabidopsis thaliana	common cis-acting element in promoter and enhancer regions
TaARL1e-A	CAAT-box	CAAT	430	4	-	Nicotiana glutinosa
TaARL1e-A	CAAT-box	CAAAT	439	5	+	Pisum sativum	common cis-acting element in promoter and enhancer regions
TaARL1e-A	CAAT-box	CAAAT	474	5	+	Pisum sativum	common cis-acting element in promoter and enhancer regions
TaARL1e-A	CAAT-box	CAAT	477	4	-	Nicotiana glutinosa
TaARL1e-A	CAAT-box	CAAT	571	4	-	Nicotiana glutinosa
TaARL1e-A	CAAT-box	CCAAT	579	5	+	Arabidopsis thaliana	common cis-acting element in promoter and enhancer regions
TaARL1e-A	CAAT-box	CAAT	580	4	+	Nicotiana glutinosa
TaARL1e-A	CAAT-box	CAAAT	604	5	-	Pisum sativum	common cis-acting element in promoter and enhancer regions
TaARL1e-A	CAAT-box	CAAT	691	4	+	Nicotiana glutinosa
TaARL1e-A	CAAT-box	CAAT	712	4	+	Nicotiana glutinosa
TaARL1e-A	CAAT-box	CAAAT	1175	5	+	Pisum sativum	common cis-acting element in promoter and enhancer regions
TaARL1e-A	CAAT-box	CAAT	1216	4	+	Nicotiana glutinosa
TaARL1e-A	CAAT-box	CAAT	1262	4	+	Nicotiana glutinosa
TaARL1e-A	CAAT-box	CAAAT	1409	5	+	Pisum sativum	common cis-acting element in promoter and enhancer regions
TaARL1e-A	CAT-box	GCCACT	210	6	-	Arabidopsis thaliana	cis-acting regulatory element related to meristem expression
TaARL1e-A	TGACG-motif	TGACG	262	5	+	Hordeum vulgare	cis-acting regulatory element involved in the MeJA-responsiveness
TaARL1e-A	TGACG-motif	TGACG	917	5	-	Hordeum vulgare	cis-acting regulatory element involved in the MeJA-responsiveness
TaARL1e-A	TGACG-motif	TGACG	1169	5	+	Hordeum vulgare	cis-acting regulatory element involved in the MeJA-responsiveness
TaARL1e-A	MBS	CAACTG	1165	6	+	Arabidopsis thaliana	MYB binding site involved in drought-inducibility
TaARL1e-A	MBS	CAACTG	1306	6	-	Arabidopsis thaliana	MYB binding site involved in drought-inducibility
TaARL1e-A	TGA-element	AACGAC	146	6	-	Brassica oleracea	auxin-responsive element
TaARL1e-A	ACE	GACACGTATG	1485	9	+	Petroselinum crispum	cis-acting element involved in light responsiveness
[truncated: 728 more rows]
