# Supplementary material for: Genome-wide identification and expression analysis of ADP-ribosylation factors associated with biotic and abiotic stress in wheat (Triticum aestivum L.)
Source: PeerJ. 2021 Mar 2;9:e10963. doi: 10.7717/peerj.10963 (PMC7934654; doi:10.7717/peerj.10963)
Supplement: Supplemental Information 13 [file peerj-09-10963-s013.xlsx]

## Sheet: Sheet1
Table S13. Detailed information on predicted cis-elements
Number	Name	types	function
1	ARE	Biotic/abiotic stress	cis-acting regulatory element essential for the anaerobic induction
2	Box 4	Biotic/abiotic stress	part of a conserved DNA module involved in light responsiveness
3	G-Box	Biotic/abiotic stress	cis-acting regulatory element involved in light responsiveness
4	GC-motif	Biotic/abiotic stress	enhancer-like element involved in anoxic specific inducibility
5	I-box	Biotic/abiotic stress	part of a light responsive element
6	LTR	Biotic/abiotic stress	cis-acting element involved in low-temperature responsiveness
7	MBS	Biotic/abiotic stress	MYB binding site involved in drought-inducibility
8	Sp1	Biotic/abiotic stress	light responsive element
9	TCT-motif	Biotic/abiotic stress	part of a light responsive element
10	ACE	Biotic/abiotic stress	cis-acting element involved in light responsiveness
11	TATA-box	Growth and development	core promoter element around -30 of transcription start
12	CAAT-box	Growth and development	common cis-acting element in promoter and enhancer regions
13	CAT-box	Growth and development	cis-acting regulatory element related to meristem expression
14	CCAAT-box	Growth and development	MYBHv1 binding site
15	O2-site	Growth and development	cis-acting regulatory element involved in zein metabolism regulation
16	A-box	Growth and development	cis-acting regulatory element
17	TATC-box	Phytohormone response	cis-acting element involved in gibberellin-responsiveness
18	ABRE	Phytohormone response	cis-acting element involved in the abscisic acid responsiveness
19	AuxRR-core	Phytohormone response	cis-acting regulatory element involved in auxin responsiveness
20	CGTCA-motif	Phytohormone response	cis-acting regulatory element involved in the MeJA-responsiveness
21	GARE-motif	Phytohormone response	gibberellin-responsive element
22	TCA-element	Phytohormone response	cis-acting element involved in salicylic acid responsiveness
23	TGACG-motif	Phytohormone response	cis-acting regulatory element involved in the MeJA-responsiveness
24	TGA-element	Phytohormone response	auxin-responsive element
25	P-box	Phytohormone response	gibberellin-responsive element
