# Supplementary material for: Genome-wide identification and expression analysis of ADP-ribosylation factors associated with biotic and abiotic stress in wheat (Triticum aestivum L.)
Source: PeerJ. 2021 Mar 2;9:e10963. doi: 10.7717/peerj.10963 (PMC7934654; doi:10.7717/peerj.10963)
Supplement: Supplemental Information 14 [file peerj-09-10963-s014.xlsx]

## Sheet: Sheet1
Table S14. Detailed information of GO annotation
GO ID	Description	Term Type	ARF ID num	ARF ID percent
GO:0032501	multicellular organismal process	biological_process	4	4/56
GO:0050789	regulation of biological process	biological_process	42	42/56
GO:0022414	reproductive process	biological_process	4	4/56
GO:0050896	response to stimulus	biological_process	42	42/56
GO:0009987	cellular process	biological_process	42	42/56
GO:0000003	reproduction	biological_process	4	4/56
GO:0065007	biological regulation	biological_process	42	42/56
GO:0051179	localization	biological_process	13	13/56
GO:0032502	developmental process	biological_process	4	4/56
GO:0044699	single-organism process	biological_process	42	42/56
GO:0023052	signaling	biological_process	42	42/56
GO:0002376	immune system process	biological_process	3	3/56
GO:0051704	multi-organism process	biological_process	3	3/56
GO:0005623	cell	cellular_component	50	50/56
GO:0043226	organelle	cellular_component	19	19/56
GO:0044422	organelle part	cellular_component	3	3/56
GO:0044464	cell part	cellular_component	50	50/56
GO:0016020	membrane	cellular_component	3	3/56
GO:0005215	transporter activity	molecular_function	8	8/56
GO:0005488	binding	molecular_function	50	50/56
